# Supplementary material for: Decoding mutational hotspots in human disease through the gene modules governing thymic regulatory T cells
Source: bioRxiv preprint, doi:10.1101/2023.12.27.573411, version 1 (2023-12-27)
Supplement: Supplemental Table S4 [file 573411_file07.xlsx]

## Sheet: FOXP3 direct targets
target_hgnc_symbol	ensembl_gene_id
ADAMTS7P4	ENSG00000218052
AMPH	ENSG00000078053
ARRDC3	ENSG00000113369
BBC3	ENSG00000105327
C1QTNF6	ENSG00000133466
CACNB2	ENSG00000165995
CAMK4	ENSG00000152495
CBX7	ENSG00000100307
CD40LG	ENSG00000102245
CD82	ENSG00000085117
CDC14A	ENSG00000079335
CHI3L2	ENSG00000064886
DAPK2	ENSG00000035664
DEPTOR	ENSG00000155792
DUSP10	ENSG00000143507
DUSP4	ENSG00000120875
ECT2	ENSG00000114346
EDAR	ENSG00000135960
EPAS1	ENSG00000116016
FCHO2	ENSG00000157107
FLOT2	ENSG00000132589
FOXO1	ENSG00000150907
FRY	ENSG00000073910
GABARAPL1	ENSG00000139112
GNG4	ENSG00000168243
IKZF2	ENSG00000030419
IKZF4	ENSG00000123411
IL2RA	ENSG00000134460
IL7R	ENSG00000168685
IRF4	ENSG00000137265
ITGA5	ENSG00000161638
KLF6	ENSG00000067082
LDLRAD4	ENSG00000168675
LINC01089	ENSG00000212694
LINC01619	ENSG00000257242
LRRC8D	ENSG00000171492
MAGEH1	ENSG00000187601
MAP3K8	ENSG00000107968
MDK	ENSG00000110492
MPP7	ENSG00000150054
MTURN	ENSG00000180354
NFIA	ENSG00000162599
NR4A3	ENSG00000119508
OSBPL3	ENSG00000070882
PCDH12	ENSG00000113555
PERP	ENSG00000112378
PHLPP1	ENSG00000081913
PLXDC1	ENSG00000161381
PRDM1	ENSG00000057657
RAB3A	ENSG00000105649
RASGRP4	ENSG00000171777
RFTN1	ENSG00000131378
RGS1	ENSG00000090104
RHOBTB1	ENSG00000072422
RORA	ENSG00000069667
RUNX1	ENSG00000159216
SCML4	ENSG00000146285
SH3BP5	ENSG00000131370
SLC9B2	ENSG00000164038
SMARCA2	ENSG00000080503
SYTL2	ENSG00000137501
SYTL3	ENSG00000164674
TAGLN2	ENSG00000158710
TC2N	ENSG00000165929
TFEB	ENSG00000112561
TGIF1	ENSG00000177426
TIGD2	ENSG00000180346
TMEM140	ENSG00000146859
TNFAIP3	ENSG00000118503
TNIP1	ENSG00000145901
TRABD2A	ENSG00000186854
TRIB1	ENSG00000173334
	ENSG00000259097
	ENSG00000226423

## Sheet: TFBS at FOXP3 targets
TFBS_chr	TFBS_start	TFBS_end	TF_hgnc_symbol	jaspar_motif_id	target_hgnc_symbol	ensembl_gene_id
chr1	61082143	61082158	AR	MA0007.2	NFIA	ENSG00000162599
chr1	61453408	61453423	AR	MA0007.2	NFIA	ENSG00000162599
chr1	89856006	89856021	AR	MA0007.2	LRRC8D	ENSG00000171492
chr1	221708942	221708957	AR	MA0007.2	DUSP10	ENSG00000143507
chr1	221726514	221726529	AR	MA0007.2	DUSP10	ENSG00000143507
chr1	235642356	235642371	AR	MA0007.2	GNG4	ENSG00000168243
chr10	3782694	3782709	AR	MA0007.2	KLF6	ENSG00000067082
chr10	6051125	6051140	AR	MA0007.2	IL2RA	ENSG00000134460
chr12	92030835	92030850	AR	MA0007.2	LINC01619	ENSG00000257242
chr12	92030851	92030866	AR	MA0007.2	LINC01619	ENSG00000257242
chr5	91380872	91380887	AR	MA0007.2	ARRDC3	ENSG00000113369
chr6	106097811	106097826	AR	MA0007.2	PRDM1	ENSG00000057657
chr6	137873503	137873518	AR	MA0007.2	TNFAIP3	ENSG00000118503
chr6	137873608	137873623	AR	MA0007.2	TNFAIP3	ENSG00000118503
chr6	137882703	137882718	AR	MA0007.2	TNFAIP3	ENSG00000118503
chr1	61453282	61453295	ATF2	MA1632.1	NFIA	ENSG00000162599
chr1	89855859	89855872	ATF2	MA1632.1	LRRC8D	ENSG00000171492
chr1	159925247	159925260	ATF2	MA1632.1	TAGLN2	ENSG00000158710
chr1	221709100	221709113	ATF2	MA1632.1	DUSP10	ENSG00000143507
chr1	221709162	221709175	ATF2	MA1632.1	DUSP10	ENSG00000143507
chr1	221709260	221709273	ATF2	MA1632.1	DUSP10	ENSG00000143507
chr1	221712432	221712445	ATF2	MA1632.1	DUSP10	ENSG00000143507
chr1	221742311	221742324	ATF2	MA1632.1	DUSP10	ENSG00000143507
chr10	3775998	3776011	ATF2	MA1632.1	KLF6	ENSG00000067082
chr10	3785370	3785383	ATF2	MA1632.1	KLF6	ENSG00000067082
chr12	10212843	10212856	ATF2	MA1632.1	GABARAPL1	ENSG00000139112
chr15	60592575	60592588	ATF2	MA1632.1	RORA	ENSG00000069667
chr18	62715268	62715281	ATF2	MA1632.1	PHLPP1	ENSG00000081913
chr2	213147755	213147768	ATF2	MA1632.1	IKZF2	ENSG00000030419
chr7	30134666	30134679	ATF2	MA1632.1	MTURN	ENSG00000180354
chr7	30134727	30134740	ATF2	MA1632.1	MTURN	ENSG00000180354
chr7	135148037	135148050	ATF2	MA1632.1	TMEM140	ENSG00000146859
chr1	61453282	61453296	ATF4	MA0833.2	NFIA	ENSG00000162599
chr1	221709260	221709274	ATF4	MA0833.2	DUSP10	ENSG00000143507
chr12	92056002	92056016	ATF4	MA0833.2	LINC01619	ENSG00000257242
chr18	3449118	3449132	ATF4	MA0833.2	TGIF1	ENSG00000177426
chr6	446782	446796	ATF4	MA0833.2	IRF4	ENSG00000137265
chr6	41733064	41733078	ATF4	MA0833.2	TFEB	ENSG00000112561
chr7	135148509	135148523	ATF4	MA0833.2	TMEM140	ENSG00000146859
chr1	61453181	61453195	ATF6	MA1466.1	NFIA	ENSG00000162599
chr1	192575638	192575652	ATF6	MA1466.1	RGS1	ENSG00000090104
chr1	221742428	221742442	ATF6	MA1466.1	DUSP10	ENSG00000143507
chr12	92065196	92065210	ATF6	MA1466.1	LINC01619	ENSG00000257242
chr6	137866939	137866953	ATF6	MA1466.1	TNFAIP3	ENSG00000118503
chr9	99821772	99821786	ATF6	MA1466.1	NR4A3	ENSG00000119508
chr9	99821856	99821870	ATF6	MA1466.1	NR4A3	ENSG00000119508
chr1	221712431	221712445	ATF7	MA0834.1	DUSP10	ENSG00000143507
chr1	221742311	221742325	ATF7	MA0834.1	DUSP10	ENSG00000143507
chr10	3775998	3776012	ATF7	MA0834.1	KLF6	ENSG00000067082
chr12	10212843	10212857	ATF7	MA0834.1	GABARAPL1	ENSG00000139112
chr18	62715268	62715282	ATF7	MA0834.1	PHLPP1	ENSG00000081913
chr7	30134665	30134679	ATF7	MA0834.1	MTURN	ENSG00000180354
chr7	30134727	30134741	ATF7	MA0834.1	MTURN	ENSG00000180354
chr9	99821787	99821801	ATF7	MA0834.1	NR4A3	ENSG00000119508
chr1	159924633	159924646	BACH1	MA1633.1	TAGLN2	ENSG00000158710
chr1	221712318	221712331	BACH1	MA1633.1	DUSP10	ENSG00000143507
chr1	221712406	221712419	BACH1	MA1633.1	DUSP10	ENSG00000143507
chr1	235642536	235642549	BACH1	MA1633.1	GNG4	ENSG00000168243
chr10	3776105	3776118	BACH1	MA1633.1	KLF6	ENSG00000067082
chr10	3783071	3783084	BACH1	MA1633.1	KLF6	ENSG00000067082
chr10	6052801	6052814	BACH1	MA1633.1	IL2RA	ENSG00000134460
chr11	44569323	44569336	BACH1	MA1633.1	CD82	ENSG00000085117
chr11	46380522	46380535	BACH1	MA1633.1	MDK	ENSG00000110492
chr12	10212363	10212376	BACH1	MA1633.1	GABARAPL1	ENSG00000139112
chr12	10213471	10213484	BACH1	MA1633.1	GABARAPL1	ENSG00000139112
chr15	60582592	60582605	BACH1	MA1633.1	RORA	ENSG00000069667
chr18	3448425	3448438	BACH1	MA1633.1	TGIF1	ENSG00000177426
chr18	13375411	13375424	BACH1	MA1633.1	LDLRAD4	ENSG00000168675
chr18	13375520	13375533	BACH1	MA1633.1	LDLRAD4	ENSG00000168675
chr18	13375542	13375555	BACH1	MA1633.1	LDLRAD4	ENSG00000168675
chr2	213151350	213151363	BACH1	MA1633.1	IKZF2	ENSG00000030419
chr5	151078962	151078975	BACH1	MA1633.1	TNIP1	ENSG00000145901
chr6	404479	404492	BACH1	MA1633.1	IRF4	ENSG00000137265
chr6	446971	446984	BACH1	MA1633.1	IRF4	ENSG00000137265
chr6	137866299	137866312	BACH1	MA1633.1	TNFAIP3	ENSG00000118503
chr6	138107511	138107524	BACH1	MA1633.1	PERP	ENSG00000112378
chr8	125434804	125434817	BACH1	MA1633.1	TRIB1	ENSG00000173334
chr1	159924631	159924650	BACH2	MA1101.2	TAGLN2	ENSG00000158710
chr1	221712402	221712421	BACH2	MA1101.2	DUSP10	ENSG00000143507
chr1	235642532	235642551	BACH2	MA1101.2	GNG4	ENSG00000168243
chr10	3783067	3783086	BACH2	MA1101.2	KLF6	ENSG00000067082
chr10	6052799	6052818	BACH2	MA1101.2	IL2RA	ENSG00000134460
chr12	10212361	10212380	BACH2	MA1101.2	GABARAPL1	ENSG00000139112
chr12	10213467	10213486	BACH2	MA1101.2	GABARAPL1	ENSG00000139112
chr15	60582588	60582607	BACH2	MA1101.2	RORA	ENSG00000069667
chr18	13375409	13375428	BACH2	MA1101.2	LDLRAD4	ENSG00000168675
chr2	213119618	213119637	BACH2	MA1101.2	IKZF2	ENSG00000030419
chr2	213147720	213147739	BACH2	MA1101.2	IKZF2	ENSG00000030419
chr4	89111037	89111056	BACH2	MA1101.2	TIGD2	ENSG00000180346
chr5	141973995	141974014	BACH2	MA1101.2	PCDH12	ENSG00000113555
chr5	141974129	141974148	BACH2	MA1101.2	PCDH12	ENSG00000113555
chr6	137866295	137866314	BACH2	MA1101.2	TNFAIP3	ENSG00000118503
chr8	125434802	125434821	BACH2	MA1101.2	TRIB1	ENSG00000173334
chr1	89855916	89855927	BATF	MA1634.1	LRRC8D	ENSG00000171492
chr1	159924635	159924646	BATF	MA1634.1	TAGLN2	ENSG00000158710
chr1	159925475	159925486	BATF	MA1634.1	TAGLN2	ENSG00000158710
chr1	221712406	221712417	BATF	MA1634.1	DUSP10	ENSG00000143507
chr1	235642536	235642547	BATF	MA1634.1	GNG4	ENSG00000168243
chr10	3783071	3783082	BATF	MA1634.1	KLF6	ENSG00000067082
chr10	6052803	6052814	BATF	MA1634.1	IL2RA	ENSG00000134460
chr11	44569325	44569336	BATF	MA1634.1	CD82	ENSG00000085117
chr11	46380522	46380533	BATF	MA1634.1	MDK	ENSG00000110492
chr12	10213471	10213482	BATF	MA1634.1	GABARAPL1	ENSG00000139112
chr12	92065168	92065179	BATF	MA1634.1	LINC01619	ENSG00000257242
chr15	60582592	60582603	BATF	MA1634.1	RORA	ENSG00000069667
chr17	28897897	28897908	BATF	MA1634.1	FLOT2	ENSG00000132589
chr18	13375413	13375424	BATF	MA1634.1	LDLRAD4	ENSG00000168675
chr18	13375476	13375487	BATF	MA1634.1	LDLRAD4	ENSG00000168675
chr2	213151350	213151361	BATF	MA1634.1	IKZF2	ENSG00000030419
chr3	16457141	16457152	BATF	MA1634.1	RFTN1	ENSG00000131378
chr5	141973999	141974010	BATF	MA1634.1	PCDH12	ENSG00000113555
chr5	151078962	151078973	BATF	MA1634.1	TNIP1	ENSG00000145901
chr6	389857	389868	BATF	MA1634.1	IRF4	ENSG00000137265
chr6	446971	446982	BATF	MA1634.1	IRF4	ENSG00000137265
chr6	106098896	106098907	BATF	MA1634.1	PRDM1	ENSG00000057657
chr6	137866299	137866310	BATF	MA1634.1	TNFAIP3	ENSG00000118503
chr6	137866971	137866982	BATF	MA1634.1	TNFAIP3	ENSG00000118503
chr6	138107511	138107522	BATF	MA1634.1	PERP	ENSG00000112378
chr8	125430280	125430291	BATF	MA1634.1	TRIB1	ENSG00000173334
chr8	125434806	125434817	BATF	MA1634.1	TRIB1	ENSG00000173334
chr1	159925769	159925785	BCL6	MA0463.2	TAGLN2	ENSG00000158710
chr1	192580746	192580762	BCL6	MA0463.2	RGS1	ENSG00000090104
chr12	121802105	121802121	BCL6	MA0463.2	LINC01089	ENSG00000212694
chr18	3448149	3448165	BCL6	MA0463.2	TGIF1	ENSG00000177426
chr2	213119327	213119343	BCL6	MA0463.2	IKZF2	ENSG00000030419
chr5	91380946	91380962	BCL6	MA0463.2	ARRDC3	ENSG00000113369
chr5	91383242	91383258	BCL6	MA0463.2	ARRDC3	ENSG00000113369
chr6	400165	400181	BCL6	MA0463.2	IRF4	ENSG00000137265
chr6	137873306	137873322	BCL6	MA0463.2	TNFAIP3	ENSG00000118503
chr9	99821808	99821824	BCL6	MA0463.2	NR4A3	ENSG00000119508
chr12	92065198	92065208	BHLHE40	MA0464.2	LINC01619	ENSG00000257242
chr22	39145776	39145786	BHLHE40	MA0464.2	CBX7	ENSG00000100307
chr6	137866747	137866757	BHLHE40	MA0464.2	TNFAIP3	ENSG00000118503
chr6	137867178	137867188	BHLHE40	MA0464.2	TNFAIP3	ENSG00000118503
chr10	3776890	3776900	CEBPB	MA0466.2	KLF6	ENSG00000067082
chr18	62717421	62717431	CEBPB	MA0466.2	PHLPP1	ENSG00000081913
chr6	446784	446794	CEBPB	MA0466.2	IRF4	ENSG00000137265
chr6	137873525	137873535	CEBPB	MA0466.2	TNFAIP3	ENSG00000118503
chr8	125430218	125430228	CEBPB	MA0466.2	TRIB1	ENSG00000173334
chr10	3776890	3776900	CEBPE	MA0837.1	KLF6	ENSG00000067082
chr18	62717421	62717431	CEBPE	MA0837.1	PHLPP1	ENSG00000081913
chr6	446784	446794	CEBPE	MA0837.1	IRF4	ENSG00000137265
chr6	137873525	137873535	CEBPE	MA0837.1	TNFAIP3	ENSG00000118503
chr8	125430218	125430228	CEBPE	MA0837.1	TRIB1	ENSG00000173334
chr18	62717421	62717431	CEBPG	MA0838.1	PHLPP1	ENSG00000081913
chr6	446784	446794	CEBPG	MA0838.1	IRF4	ENSG00000137265
chr6	137873525	137873535	CEBPG	MA0838.1	TNFAIP3	ENSG00000118503
chr8	125430218	125430228	CEBPG	MA0838.1	TRIB1	ENSG00000173334
chr8	125434715	125434725	CEBPG	MA0838.1	TRIB1	ENSG00000173334
chr1	221709021	221709031	CLOCK	MA0819.1	DUSP10	ENSG00000143507
chr10	3782613	3782623	CLOCK	MA0819.1	KLF6	ENSG00000067082
chr12	121803332	121803342	CLOCK	MA0819.1	LINC01089	ENSG00000212694
chr19	38427540	38427550	CLOCK	MA0819.1	RASGRP4	ENSG00000171777
chr1	61453282	61453295	CREB1	MA0018.4	NFIA	ENSG00000162599
chr1	89855859	89855872	CREB1	MA0018.4	LRRC8D	ENSG00000171492
chr1	159925247	159925260	CREB1	MA0018.4	TAGLN2	ENSG00000158710
chr1	192575685	192575698	CREB1	MA0018.4	RGS1	ENSG00000090104
chr1	221709100	221709113	CREB1	MA0018.4	DUSP10	ENSG00000143507
chr1	221709162	221709175	CREB1	MA0018.4	DUSP10	ENSG00000143507
chr1	221709260	221709273	CREB1	MA0018.4	DUSP10	ENSG00000143507
chr1	221742311	221742324	CREB1	MA0018.4	DUSP10	ENSG00000143507
chr10	3775998	3776011	CREB1	MA0018.4	KLF6	ENSG00000067082
chr10	3785370	3785383	CREB1	MA0018.4	KLF6	ENSG00000067082
chr10	6051340	6051353	CREB1	MA0018.4	IL2RA	ENSG00000134460
chr12	10212844	10212857	CREB1	MA0018.4	GABARAPL1	ENSG00000139112
chr15	60592575	60592588	CREB1	MA0018.4	RORA	ENSG00000069667
chr2	213147755	213147768	CREB1	MA0018.4	IKZF2	ENSG00000030419
chr6	400015	400028	CREB1	MA0018.4	IRF4	ENSG00000137265
chr6	445050	445063	CREB1	MA0018.4	IRF4	ENSG00000137265
chr7	30134666	30134679	CREB1	MA0018.4	MTURN	ENSG00000180354
chr7	30134728	30134741	CREB1	MA0018.4	MTURN	ENSG00000180354
chr7	135148037	135148050	CREB1	MA0018.4	TMEM140	ENSG00000146859
chr1	221709098	221709114	CREM	MA0609.2	DUSP10	ENSG00000143507
chr1	221709160	221709176	CREM	MA0609.2	DUSP10	ENSG00000143507
chr1	221742310	221742326	CREM	MA0609.2	DUSP10	ENSG00000143507
chr10	3775997	3776013	CREM	MA0609.2	KLF6	ENSG00000067082
chr10	3785369	3785385	CREM	MA0609.2	KLF6	ENSG00000067082
chr10	6051338	6051354	CREM	MA0609.2	IL2RA	ENSG00000134460
chr12	10212423	10212439	CREM	MA0609.2	GABARAPL1	ENSG00000139112
chr12	10212842	10212858	CREM	MA0609.2	GABARAPL1	ENSG00000139112
chr15	60592573	60592589	CREM	MA0609.2	RORA	ENSG00000069667
chr3	16512045	16512061	CREM	MA0609.2	RFTN1	ENSG00000131378
chr6	137866938	137866954	CREM	MA0609.2	TNFAIP3	ENSG00000118503
chr6	137867175	137867191	CREM	MA0609.2	TNFAIP3	ENSG00000118503
chr7	30134664	30134680	CREM	MA0609.2	MTURN	ENSG00000180354
chr7	30134726	30134742	CREM	MA0609.2	MTURN	ENSG00000180354
chr7	135148035	135148051	CREM	MA0609.2	TMEM140	ENSG00000146859
chr1	61043113	61043132	CTCF	MA0139.1	NFIA	ENSG00000162599
chr1	61050054	61050073	CTCF	MA0139.1	NFIA	ENSG00000162599
chr1	89843414	89843433	CTCF	MA0139.1	LRRC8D	ENSG00000171492
chr1	159924722	159924741	CTCF	MA0139.1	TAGLN2	ENSG00000158710
chr13	40666768	40666787	CTCF	MA0139.1	FOXO1	ENSG00000150907
chr18	62714967	62714986	CTCF	MA0139.1	PHLPP1	ENSG00000081913
chr22	37198628	37198647	CTCF	MA0139.1	C1QTNF6	ENSG00000133466
chr22	37199618	37199637	CTCF	MA0139.1	C1QTNF6	ENSG00000133466
chr4	89111320	89111339	CTCF	MA0139.1	TIGD2	ENSG00000180346
chr5	72955943	72955962	CTCF	MA0139.1	FCHO2	ENSG00000157107
chr5	91384998	91385017	CTCF	MA0139.1	ARRDC3	ENSG00000113369
chr5	141960894	141960913	CTCF	MA0139.1	PCDH12	ENSG00000113555
chr6	41683750	41683769	CTCF	MA0139.1	TFEB	ENSG00000112561
chr6	41735221	41735240	CTCF	MA0139.1	TFEB	ENSG00000112561
chr6	41735623	41735642	CTCF	MA0139.1	TFEB	ENSG00000112561
chr6	137867128	137867147	CTCF	MA0139.1	TNFAIP3	ENSG00000118503
chr6	138109576	138109595	CTCF	MA0139.1	PERP	ENSG00000112378
chr8	29340364	29340383	CTCF	MA0139.1	DUSP4	ENSG00000120875
chr8	125432199	125432218	CTCF	MA0139.1	TRIB1	ENSG00000173334
chr1	61078051	61078061	CUX1	MA0754.1	NFIA	ENSG00000162599
chr1	61453346	61453356	CUX1	MA0754.1	NFIA	ENSG00000162599
chr18	62717448	62717458	CUX1	MA0754.1	PHLPP1	ENSG00000081913
chr2	213151923	213151933	CUX1	MA0754.1	IKZF2	ENSG00000030419
chr1	61453346	61453356	CUX2	MA0755.1	NFIA	ENSG00000162599
chr12	121802098	121802108	CUX2	MA0755.1	LINC01089	ENSG00000212694
chr18	62717448	62717458	CUX2	MA0755.1	PHLPP1	ENSG00000081913
chr2	213151923	213151933	CUX2	MA0755.1	IKZF2	ENSG00000030419
chr1	61453283	61453295	DBP	MA0639.1	NFIA	ENSG00000162599
chr1	89871092	89871104	DBP	MA0639.1	LRRC8D	ENSG00000171492
chr1	221709261	221709273	DBP	MA0639.1	DUSP10	ENSG00000143507
chr6	446783	446795	DBP	MA0639.1	IRF4	ENSG00000137265
chr6	41735070	41735082	DBP	MA0639.1	TFEB	ENSG00000112561
chr8	125429913	125429925	DBP	MA0639.1	TRIB1	ENSG00000173334
chr8	125434843	125434855	DBP	MA0639.1	TRIB1	ENSG00000173334
chr3	16462866	16462882	E2F3	MA0469.3	RFTN1	ENSG00000131378
chr1	89843552	89843565	E2F6	MA0471.2	LRRC8D	ENSG00000171492
chr1	159923366	159923379	E2F6	MA0471.2	TAGLN2	ENSG00000158710
chr1	159924651	159924664	E2F6	MA0471.2	TAGLN2	ENSG00000158710
chr1	159925610	159925623	E2F6	MA0471.2	TAGLN2	ENSG00000158710
chr1	221709337	221709350	E2F6	MA0471.2	DUSP10	ENSG00000143507
chr1	221743071	221743084	E2F6	MA0471.2	DUSP10	ENSG00000143507
chr1	235642315	235642328	E2F6	MA0471.2	GNG4	ENSG00000168243
chr10	3785685	3785698	E2F6	MA0471.2	KLF6	ENSG00000067082
chr10	30433914	30433927	E2F6	MA0471.2	MAP3K8	ENSG00000107968
chr11	44565318	44565331	E2F6	MA0471.2	CD82	ENSG00000085117
chr11	44565515	44565528	E2F6	MA0471.2	CD82	ENSG00000085117
chr15	60720974	60720987	E2F6	MA0471.2	RORA	ENSG00000069667
chr18	13217896	13217909	E2F6	MA0471.2	LDLRAD4	ENSG00000168675
chr18	13375721	13375734	E2F6	MA0471.2	LDLRAD4	ENSG00000168675
chr18	62715312	62715325	E2F6	MA0471.2	PHLPP1	ENSG00000081913
chr18	62715328	62715341	E2F6	MA0471.2	PHLPP1	ENSG00000081913
chr18	62715445	62715458	E2F6	MA0471.2	PHLPP1	ENSG00000081913
chr22	37186647	37186660	E2F6	MA0471.2	C1QTNF6	ENSG00000133466
chr22	39145604	39145617	E2F6	MA0471.2	CBX7	ENSG00000100307
chr22	39145785	39145798	E2F6	MA0471.2	CBX7	ENSG00000100307
chr22	39152681	39152694	E2F6	MA0471.2	CBX7	ENSG00000100307
chr22	39152903	39152916	E2F6	MA0471.2	CBX7	ENSG00000100307
chr4	89111422	89111435	E2F6	MA0471.2	TIGD2	ENSG00000180346
chr6	41735003	41735016	E2F6	MA0471.2	TFEB	ENSG00000112561
chr6	41735030	41735043	E2F6	MA0471.2	TFEB	ENSG00000112561
chr6	41735059	41735072	E2F6	MA0471.2	TFEB	ENSG00000112561
chr6	41735498	41735511	E2F6	MA0471.2	TFEB	ENSG00000112561
chr6	41735533	41735546	E2F6	MA0471.2	TFEB	ENSG00000112561
chr6	41735612	41735625	E2F6	MA0471.2	TFEB	ENSG00000112561
chr6	137866332	137866345	E2F6	MA0471.2	TNFAIP3	ENSG00000118503
chr6	137866728	137866741	E2F6	MA0471.2	TNFAIP3	ENSG00000118503
chr7	30134803	30134816	E2F6	MA0471.2	MTURN	ENSG00000180354
chr7	30134854	30134867	E2F6	MA0471.2	MTURN	ENSG00000180354
chr8	29350834	29350847	E2F6	MA0471.2	DUSP4	ENSG00000120875
chr8	125429539	125429552	E2F6	MA0471.2	TRIB1	ENSG00000173334
chr8	125429800	125429813	E2F6	MA0471.2	TRIB1	ENSG00000173334
chr8	125429890	125429903	E2F6	MA0471.2	TRIB1	ENSG00000173334
chr9	99821910	99821923	E2F6	MA0471.2	NR4A3	ENSG00000119508
chr1	61078133	61078147	EGR1	MA0162.4	NFIA	ENSG00000162599
chr1	159923771	159923785	EGR1	MA0162.4	TAGLN2	ENSG00000158710
chr1	159925791	159925805	EGR1	MA0162.4	TAGLN2	ENSG00000158710
chr10	3785529	3785543	EGR1	MA0162.4	KLF6	ENSG00000067082
chr10	18400528	18400542	EGR1	MA0162.4	CACNB2	ENSG00000165995
chr11	44565273	44565287	EGR1	MA0162.4	CD82	ENSG00000085117
chr11	44565563	44565577	EGR1	MA0162.4	CD82	ENSG00000085117
chr12	10213264	10213278	EGR1	MA0162.4	GABARAPL1	ENSG00000139112
chr12	56007829	56007843	EGR1	MA0162.4	IKZF4	ENSG00000123411
chr15	60592685	60592699	EGR1	MA0162.4	RORA	ENSG00000069667
chr17	28897511	28897525	EGR1	MA0162.4	FLOT2	ENSG00000132589
chr18	3448371	3448385	EGR1	MA0162.4	TGIF1	ENSG00000177426
chr18	13612540	13612554	EGR1	MA0162.4	LDLRAD4	ENSG00000168675
chr18	13612557	13612571	EGR1	MA0162.4	LDLRAD4	ENSG00000168675
chr22	37199209	37199223	EGR1	MA0162.4	C1QTNF6	ENSG00000133466
chr22	39145628	39145642	EGR1	MA0162.4	CBX7	ENSG00000100307
chr22	39145649	39145663	EGR1	MA0162.4	CBX7	ENSG00000100307
chr22	39145664	39145678	EGR1	MA0162.4	CBX7	ENSG00000100307
chr22	39152672	39152686	EGR1	MA0162.4	CBX7	ENSG00000100307
chr22	39152778	39152792	EGR1	MA0162.4	CBX7	ENSG00000100307
chr4	89111481	89111495	EGR1	MA0162.4	TIGD2	ENSG00000180346
chr4	89111507	89111521	EGR1	MA0162.4	TIGD2	ENSG00000180346
chr5	91381023	91381037	EGR1	MA0162.4	ARRDC3	ENSG00000113369
chr5	151080588	151080602	EGR1	MA0162.4	TNIP1	ENSG00000145901
chr6	400068	400082	EGR1	MA0162.4	IRF4	ENSG00000137265
chr6	446962	446976	EGR1	MA0162.4	IRF4	ENSG00000137265
chr6	41734796	41734810	EGR1	MA0162.4	TFEB	ENSG00000112561
chr6	41734842	41734856	EGR1	MA0162.4	TFEB	ENSG00000112561
chr6	41735091	41735105	EGR1	MA0162.4	TFEB	ENSG00000112561
chr6	41735194	41735208	EGR1	MA0162.4	TFEB	ENSG00000112561
chr6	137866731	137866745	EGR1	MA0162.4	TNFAIP3	ENSG00000118503
chr6	137867299	137867313	EGR1	MA0162.4	TNFAIP3	ENSG00000118503
chr6	138107426	138107440	EGR1	MA0162.4	PERP	ENSG00000112378
chr8	29350837	29350851	EGR1	MA0162.4	DUSP4	ENSG00000120875
chr8	125429604	125429618	EGR1	MA0162.4	TRIB1	ENSG00000173334
chr8	125429684	125429698	EGR1	MA0162.4	TRIB1	ENSG00000173334
chr8	125429893	125429907	EGR1	MA0162.4	TRIB1	ENSG00000173334
chr8	125430024	125430038	EGR1	MA0162.4	TRIB1	ENSG00000173334
chrX	55452096	55452110	EGR1	MA0162.4	MAGEH1	ENSG00000187601
chr1	159923772	159923783	EGR2	MA0472.2	TAGLN2	ENSG00000158710
chr1	235642382	235642393	EGR2	MA0472.2	GNG4	ENSG00000168243
chr12	10213259	10213270	EGR2	MA0472.2	GABARAPL1	ENSG00000139112
chr12	56007830	56007841	EGR2	MA0472.2	IKZF4	ENSG00000123411
chr15	60592687	60592698	EGR2	MA0472.2	RORA	ENSG00000069667
chr22	39145651	39145662	EGR2	MA0472.2	CBX7	ENSG00000100307
chr22	39152780	39152791	EGR2	MA0472.2	CBX7	ENSG00000100307
chr4	89111109	89111120	EGR2	MA0472.2	TIGD2	ENSG00000180346
chr4	89111508	89111519	EGR2	MA0472.2	TIGD2	ENSG00000180346
chr6	446963	446974	EGR2	MA0472.2	IRF4	ENSG00000137265
chr6	137866733	137866744	EGR2	MA0472.2	TNFAIP3	ENSG00000118503
chr6	137867300	137867311	EGR2	MA0472.2	TNFAIP3	ENSG00000118503
chr1	159923770	159923785	EGR3	MA0732.1	TAGLN2	ENSG00000158710
chr1	221742122	221742137	EGR3	MA0732.1	DUSP10	ENSG00000143507
chr11	44565272	44565287	EGR3	MA0732.1	CD82	ENSG00000085117
chr12	10213263	10213278	EGR3	MA0732.1	GABARAPL1	ENSG00000139112
chr12	56007828	56007843	EGR3	MA0732.1	IKZF4	ENSG00000123411
chr15	60592685	60592700	EGR3	MA0732.1	RORA	ENSG00000069667
chr17	28897511	28897526	EGR3	MA0732.1	FLOT2	ENSG00000132589
chr18	13217906	13217921	EGR3	MA0732.1	LDLRAD4	ENSG00000168675
chr18	13612557	13612572	EGR3	MA0732.1	LDLRAD4	ENSG00000168675
chr18	62715464	62715479	EGR3	MA0732.1	PHLPP1	ENSG00000081913
chr22	37198804	37198819	EGR3	MA0732.1	C1QTNF6	ENSG00000133466
chr22	37199209	37199224	EGR3	MA0732.1	C1QTNF6	ENSG00000133466
chr22	39145649	39145664	EGR3	MA0732.1	CBX7	ENSG00000100307
chr22	39152671	39152686	EGR3	MA0732.1	CBX7	ENSG00000100307
chr22	39152778	39152793	EGR3	MA0732.1	CBX7	ENSG00000100307
chr4	89111107	89111122	EGR3	MA0732.1	TIGD2	ENSG00000180346
chr4	89111481	89111496	EGR3	MA0732.1	TIGD2	ENSG00000180346
chr4	89111506	89111521	EGR3	MA0732.1	TIGD2	ENSG00000180346
chr5	91381023	91381038	EGR3	MA0732.1	ARRDC3	ENSG00000113369
chr6	41734796	41734811	EGR3	MA0732.1	TFEB	ENSG00000112561
chr6	41734874	41734889	EGR3	MA0732.1	TFEB	ENSG00000112561
chr6	137866731	137866746	EGR3	MA0732.1	TNFAIP3	ENSG00000118503
chr6	137867298	137867313	EGR3	MA0732.1	TNFAIP3	ENSG00000118503
chr7	30134798	30134813	EGR3	MA0732.1	MTURN	ENSG00000180354
chr8	125429603	125429618	EGR3	MA0732.1	TRIB1	ENSG00000173334
chr8	125429935	125429950	EGR3	MA0732.1	TRIB1	ENSG00000173334
chr1	89843631	89843645	ELF1	MA0473.3	LRRC8D	ENSG00000171492
chr1	89871049	89871063	ELF1	MA0473.3	LRRC8D	ENSG00000171492
chr1	159923752	159923766	ELF1	MA0473.3	TAGLN2	ENSG00000158710
chr1	159924007	159924021	ELF1	MA0473.3	TAGLN2	ENSG00000158710
chr1	159924043	159924057	ELF1	MA0473.3	TAGLN2	ENSG00000158710
chr1	192575715	192575729	ELF1	MA0473.3	RGS1	ENSG00000090104
chr1	221712511	221712525	ELF1	MA0473.3	DUSP10	ENSG00000143507
chr1	221713295	221713309	ELF1	MA0473.3	DUSP10	ENSG00000143507
chr10	3782815	3782829	ELF1	MA0473.3	KLF6	ENSG00000067082
chr10	6051328	6051342	ELF1	MA0473.3	IL2RA	ENSG00000134460
chr11	44569116	44569130	ELF1	MA0473.3	CD82	ENSG00000085117
chr15	60580748	60580762	ELF1	MA0473.3	RORA	ENSG00000069667
chr15	60720971	60720985	ELF1	MA0473.3	RORA	ENSG00000069667
chr18	13375397	13375411	ELF1	MA0473.3	LDLRAD4	ENSG00000168675
chr18	13382443	13382457	ELF1	MA0473.3	LDLRAD4	ENSG00000168675
chr18	13382554	13382568	ELF1	MA0473.3	LDLRAD4	ENSG00000168675
chr2	213119319	213119333	ELF1	MA0473.3	IKZF2	ENSG00000030419
chr2	213151575	213151589	ELF1	MA0473.3	IKZF2	ENSG00000030419
chr22	37199428	37199442	ELF1	MA0473.3	C1QTNF6	ENSG00000133466
chr5	141960959	141960973	ELF1	MA0473.3	PCDH12	ENSG00000113555
chr5	151081023	151081037	ELF1	MA0473.3	TNIP1	ENSG00000145901
chr6	404941	404955	ELF1	MA0473.3	IRF4	ENSG00000137265
chr6	446981	446995	ELF1	MA0473.3	IRF4	ENSG00000137265
chr6	41732983	41732997	ELF1	MA0473.3	TFEB	ENSG00000112561
chr6	106097976	106097990	ELF1	MA0473.3	PRDM1	ENSG00000057657
chr8	29340285	29340299	ELF1	MA0473.3	DUSP4	ENSG00000120875
chrX	55452076	55452090	ELF1	MA0473.3	MAGEH1	ENSG00000187601
chr1	89843631	89843643	ELF2	MA1483.1	LRRC8D	ENSG00000171492
chr1	159923486	159923498	ELF2	MA1483.1	TAGLN2	ENSG00000158710
chr1	221712511	221712523	ELF2	MA1483.1	DUSP10	ENSG00000143507
chr1	221742952	221742964	ELF2	MA1483.1	DUSP10	ENSG00000143507
chr12	10213188	10213200	ELF2	MA1483.1	GABARAPL1	ENSG00000139112
chr18	13382556	13382568	ELF2	MA1483.1	LDLRAD4	ENSG00000168675
chr22	37199430	37199442	ELF2	MA1483.1	C1QTNF6	ENSG00000133466
chr22	39152388	39152400	ELF2	MA1483.1	CBX7	ENSG00000100307
chr5	91380339	91380351	ELF2	MA1483.1	ARRDC3	ENSG00000113369
chr5	141960959	141960971	ELF2	MA1483.1	PCDH12	ENSG00000113555
chr5	151081023	151081035	ELF2	MA1483.1	TNIP1	ENSG00000145901
chr6	404943	404955	ELF2	MA1483.1	IRF4	ENSG00000137265
chr8	125429592	125429604	ELF2	MA1483.1	TRIB1	ENSG00000173334
chrX	55452078	55452090	ELF2	MA1483.1	MAGEH1	ENSG00000187601
chr1	89843631	89843643	ELF4	MA0641.1	LRRC8D	ENSG00000171492
chr1	159923486	159923498	ELF4	MA0641.1	TAGLN2	ENSG00000158710
chr1	159924043	159924055	ELF4	MA0641.1	TAGLN2	ENSG00000158710
chr1	221712511	221712523	ELF4	MA0641.1	DUSP10	ENSG00000143507
chr1	221742952	221742964	ELF4	MA0641.1	DUSP10	ENSG00000143507
chr18	13382556	13382568	ELF4	MA0641.1	LDLRAD4	ENSG00000168675
chr22	37199430	37199442	ELF4	MA0641.1	C1QTNF6	ENSG00000133466
chr5	91380339	91380351	ELF4	MA0641.1	ARRDC3	ENSG00000113369
chr5	141960959	141960971	ELF4	MA0641.1	PCDH12	ENSG00000113555
chr5	151081023	151081035	ELF4	MA0641.1	TNIP1	ENSG00000145901
chr6	404943	404955	ELF4	MA0641.1	IRF4	ENSG00000137265
chr8	125429592	125429604	ELF4	MA0641.1	TRIB1	ENSG00000173334
chrX	55452078	55452090	ELF4	MA0641.1	MAGEH1	ENSG00000187601
chr1	89843633	89843643	ELK1	MA0028.2	LRRC8D	ENSG00000171492
chr1	89871051	89871061	ELK1	MA0028.2	LRRC8D	ENSG00000171492
chr10	6051173	6051183	ELK1	MA0028.2	IL2RA	ENSG00000134460
chr18	13377180	13377190	ELK1	MA0028.2	LDLRAD4	ENSG00000168675
chr22	37199430	37199440	ELK1	MA0028.2	C1QTNF6	ENSG00000133466
chr5	141960961	141960971	ELK1	MA0028.2	PCDH12	ENSG00000113555
chr6	106097978	106097988	ELK1	MA0028.2	PRDM1	ENSG00000057657
chrX	55452051	55452061	ELK1	MA0028.2	MAGEH1	ENSG00000187601
chr1	89843633	89843643	ELK3	MA0759.1	LRRC8D	ENSG00000171492
chr1	89871051	89871061	ELK3	MA0759.1	LRRC8D	ENSG00000171492
chr10	6051173	6051183	ELK3	MA0759.1	IL2RA	ENSG00000134460
chr10	18204134	18204144	ELK3	MA0759.1	CACNB2	ENSG00000165995
chr22	37199430	37199440	ELK3	MA0759.1	C1QTNF6	ENSG00000133466
chr5	141960961	141960971	ELK3	MA0759.1	PCDH12	ENSG00000113555
chr6	106097978	106097988	ELK3	MA0759.1	PRDM1	ENSG00000057657
chrX	55452051	55452061	ELK3	MA0759.1	MAGEH1	ENSG00000187601
chr1	89843633	89843644	ELK4	MA0076.2	LRRC8D	ENSG00000171492
chr1	89871050	89871061	ELK4	MA0076.2	LRRC8D	ENSG00000171492
chr1	221713297	221713308	ELK4	MA0076.2	DUSP10	ENSG00000143507
chr1	221742951	221742962	ELK4	MA0076.2	DUSP10	ENSG00000143507
chr10	3782816	3782827	ELK4	MA0076.2	KLF6	ENSG00000067082
chr10	6051173	6051184	ELK4	MA0076.2	IL2RA	ENSG00000134460
chr15	60720972	60720983	ELK4	MA0076.2	RORA	ENSG00000069667
chr22	37186651	37186662	ELK4	MA0076.2	C1QTNF6	ENSG00000133466
chr22	37199429	37199440	ELK4	MA0076.2	C1QTNF6	ENSG00000133466
chr5	91380338	91380349	ELK4	MA0076.2	ARRDC3	ENSG00000113369
chr5	141960961	141960972	ELK4	MA0076.2	PCDH12	ENSG00000113555
chr6	106097978	106097989	ELK4	MA0076.2	PRDM1	ENSG00000057657
chr8	29340287	29340298	ELK4	MA0076.2	DUSP4	ENSG00000120875
chrX	55452051	55452062	ELK4	MA0076.2	MAGEH1	ENSG00000187601
chr1	89843633	89843643	ERF	MA0760.1	LRRC8D	ENSG00000171492
chr1	89871051	89871061	ERF	MA0760.1	LRRC8D	ENSG00000171492
chr1	159924009	159924019	ERF	MA0760.1	TAGLN2	ENSG00000158710
chr10	3782817	3782827	ERF	MA0760.1	KLF6	ENSG00000067082
chr10	6051173	6051183	ERF	MA0760.1	IL2RA	ENSG00000134460
chr10	6062396	6062406	ERF	MA0760.1	IL2RA	ENSG00000134460
chr15	60720973	60720983	ERF	MA0760.1	RORA	ENSG00000069667
chr22	37199430	37199440	ERF	MA0760.1	C1QTNF6	ENSG00000133466
chr5	141960961	141960971	ERF	MA0760.1	PCDH12	ENSG00000113555
chr6	404943	404953	ERF	MA0760.1	IRF4	ENSG00000137265
chr6	106097978	106097988	ERF	MA0760.1	PRDM1	ENSG00000057657
chr6	106098925	106098935	ERF	MA0760.1	PRDM1	ENSG00000057657
chr18	13375588	13375605	ESR1	MA0112.3	LDLRAD4	ENSG00000168675
chr2	213152075	213152092	ESR1	MA0112.3	IKZF2	ENSG00000030419
chr5	91380385	91380402	ESR1	MA0112.3	ARRDC3	ENSG00000113369
chr6	137873436	137873453	ESR1	MA0112.3	TNFAIP3	ENSG00000118503
chr8	125434722	125434739	ESR1	MA0112.3	TRIB1	ENSG00000173334
chr1	61453299	61453312	ESRRA	MA0592.3	NFIA	ENSG00000162599
chr10	3785971	3785984	ESRRA	MA0592.3	KLF6	ENSG00000067082
chr10	6062471	6062484	ESRRA	MA0592.3	IL2RA	ENSG00000134460
chr3	16462810	16462823	ESRRA	MA0592.3	RFTN1	ENSG00000131378
chr5	141974153	141974166	ESRRA	MA0592.3	PCDH12	ENSG00000113555
chr6	41732974	41732987	ESRRA	MA0592.3	TFEB	ENSG00000112561
chr6	137867182	137867195	ESRRA	MA0592.3	TNFAIP3	ENSG00000118503
chr1	89843633	89843643	ETS1	MA0098.3	LRRC8D	ENSG00000171492
chr1	89871051	89871061	ETS1	MA0098.3	LRRC8D	ENSG00000171492
chr1	221742731	221742741	ETS1	MA0098.3	DUSP10	ENSG00000143507
chr10	3782817	3782827	ETS1	MA0098.3	KLF6	ENSG00000067082
chr10	6051173	6051183	ETS1	MA0098.3	IL2RA	ENSG00000134460
chr15	60720973	60720983	ETS1	MA0098.3	RORA	ENSG00000069667
chr22	37199430	37199440	ETS1	MA0098.3	C1QTNF6	ENSG00000133466
chr5	91380339	91380349	ETS1	MA0098.3	ARRDC3	ENSG00000113369
chr5	141960961	141960971	ETS1	MA0098.3	PCDH12	ENSG00000113555
chr6	404943	404953	ETS1	MA0098.3	IRF4	ENSG00000137265
chr6	106097978	106097988	ETS1	MA0098.3	PRDM1	ENSG00000057657
chr6	137877759	137877769	ETS1	MA0098.3	TNFAIP3	ENSG00000118503
chrX	55452051	55452061	ETS1	MA0098.3	MAGEH1	ENSG00000187601
chr1	89843632	89843642	ETS2	MA1484.1	LRRC8D	ENSG00000171492
chr1	89871052	89871062	ETS2	MA1484.1	LRRC8D	ENSG00000171492
chr1	159923753	159923763	ETS2	MA1484.1	TAGLN2	ENSG00000158710
chr1	221742732	221742742	ETS2	MA1484.1	DUSP10	ENSG00000143507
chr10	6051172	6051182	ETS2	MA1484.1	IL2RA	ENSG00000134460
chr12	92030838	92030848	ETS2	MA1484.1	LINC01619	ENSG00000257242
chr22	37199431	37199441	ETS2	MA1484.1	C1QTNF6	ENSG00000133466
chr5	91380340	91380350	ETS2	MA1484.1	ARRDC3	ENSG00000113369
chr5	141960960	141960970	ETS2	MA1484.1	PCDH12	ENSG00000113555
chr6	404944	404954	ETS2	MA1484.1	IRF4	ENSG00000137265
chr6	106097977	106097987	ETS2	MA1484.1	PRDM1	ENSG00000057657
chr6	137877760	137877770	ETS2	MA1484.1	TNFAIP3	ENSG00000118503
chrX	55452050	55452060	ETS2	MA1484.1	MAGEH1	ENSG00000187601
chr1	89843631	89843645	ETV1	MA0761.2	LRRC8D	ENSG00000171492
chr1	89871049	89871063	ETV1	MA0761.2	LRRC8D	ENSG00000171492
chr1	159923752	159923766	ETV1	MA0761.2	TAGLN2	ENSG00000158710
chr1	159924007	159924021	ETV1	MA0761.2	TAGLN2	ENSG00000158710
chr1	159924043	159924057	ETV1	MA0761.2	TAGLN2	ENSG00000158710
chr1	159925854	159925868	ETV1	MA0761.2	TAGLN2	ENSG00000158710
chr1	192575715	192575729	ETV1	MA0761.2	RGS1	ENSG00000090104
chr10	3782815	3782829	ETV1	MA0761.2	KLF6	ENSG00000067082
chr10	6051328	6051342	ETV1	MA0761.2	IL2RA	ENSG00000134460
chr12	92030837	92030851	ETV1	MA0761.2	LINC01619	ENSG00000257242
chr15	60580748	60580762	ETV1	MA0761.2	RORA	ENSG00000069667
chr15	60720971	60720985	ETV1	MA0761.2	RORA	ENSG00000069667
chr18	13375397	13375411	ETV1	MA0761.2	LDLRAD4	ENSG00000168675
chr18	13382443	13382457	ETV1	MA0761.2	LDLRAD4	ENSG00000168675
chr18	13382554	13382568	ETV1	MA0761.2	LDLRAD4	ENSG00000168675
chr2	213119319	213119333	ETV1	MA0761.2	IKZF2	ENSG00000030419
chr2	213151575	213151589	ETV1	MA0761.2	IKZF2	ENSG00000030419
chr22	37199428	37199442	ETV1	MA0761.2	C1QTNF6	ENSG00000133466
chr5	141960959	141960973	ETV1	MA0761.2	PCDH12	ENSG00000113555
chr6	404941	404955	ETV1	MA0761.2	IRF4	ENSG00000137265
chr6	446981	446995	ETV1	MA0761.2	IRF4	ENSG00000137265
chr6	41732983	41732997	ETV1	MA0761.2	TFEB	ENSG00000112561
chr6	106097976	106097990	ETV1	MA0761.2	PRDM1	ENSG00000057657
chr8	29340285	29340299	ETV1	MA0761.2	DUSP4	ENSG00000120875
chrX	55452076	55452090	ETV1	MA0761.2	MAGEH1	ENSG00000187601
chr1	89843633	89843643	ETV3	MA0763.1	LRRC8D	ENSG00000171492
chr1	89871051	89871061	ETV3	MA0763.1	LRRC8D	ENSG00000171492
chr1	192575669	192575679	ETV3	MA0763.1	RGS1	ENSG00000090104
chr10	6051173	6051183	ETV3	MA0763.1	IL2RA	ENSG00000134460
chr18	13377180	13377190	ETV3	MA0763.1	LDLRAD4	ENSG00000168675
chr22	37199430	37199440	ETV3	MA0763.1	C1QTNF6	ENSG00000133466
chr5	141960961	141960971	ETV3	MA0763.1	PCDH12	ENSG00000113555
chr6	137866904	137866914	ETV3	MA0763.1	TNFAIP3	ENSG00000118503
chrX	55452051	55452061	ETV3	MA0763.1	MAGEH1	ENSG00000187601
chr1	89843633	89843644	ETV5	MA0765.2	LRRC8D	ENSG00000171492
chr1	89871050	89871061	ETV5	MA0765.2	LRRC8D	ENSG00000171492
chr1	159924045	159924056	ETV5	MA0765.2	TAGLN2	ENSG00000158710
chr1	221713297	221713308	ETV5	MA0765.2	DUSP10	ENSG00000143507
chr1	221742951	221742962	ETV5	MA0765.2	DUSP10	ENSG00000143507
chr10	3782370	3782381	ETV5	MA0765.2	KLF6	ENSG00000067082
chr15	60580749	60580760	ETV5	MA0765.2	RORA	ENSG00000069667
chr15	60720972	60720983	ETV5	MA0765.2	RORA	ENSG00000069667
chr18	13375399	13375410	ETV5	MA0765.2	LDLRAD4	ENSG00000168675
chr2	213151576	213151587	ETV5	MA0765.2	IKZF2	ENSG00000030419
chr22	37199108	37199119	ETV5	MA0765.2	C1QTNF6	ENSG00000133466
chr22	37199429	37199440	ETV5	MA0765.2	C1QTNF6	ENSG00000133466
chr5	141960961	141960972	ETV5	MA0765.2	PCDH12	ENSG00000113555
chr5	151081025	151081036	ETV5	MA0765.2	TNIP1	ENSG00000145901
chr6	446983	446994	ETV5	MA0765.2	IRF4	ENSG00000137265
chr6	106097978	106097989	ETV5	MA0765.2	PRDM1	ENSG00000057657
chr8	29340287	29340298	ETV5	MA0765.2	DUSP4	ENSG00000120875
chrX	55452051	55452062	ETV5	MA0765.2	MAGEH1	ENSG00000187601
chrX	55452077	55452088	ETV5	MA0765.2	MAGEH1	ENSG00000187601
chr1	89843633	89843643	ETV6	MA0645.1	LRRC8D	ENSG00000171492
chr1	89871051	89871061	ETV6	MA0645.1	LRRC8D	ENSG00000171492
chr1	221713297	221713307	ETV6	MA0645.1	DUSP10	ENSG00000143507
chr1	221742731	221742741	ETV6	MA0645.1	DUSP10	ENSG00000143507
chr1	221742952	221742962	ETV6	MA0645.1	DUSP10	ENSG00000143507
chr10	6051173	6051183	ETV6	MA0645.1	IL2RA	ENSG00000134460
chr10	6062396	6062406	ETV6	MA0645.1	IL2RA	ENSG00000134460
chr15	60720973	60720983	ETV6	MA0645.1	RORA	ENSG00000069667
chr2	213151577	213151587	ETV6	MA0645.1	IKZF2	ENSG00000030419
chr22	37199109	37199119	ETV6	MA0645.1	C1QTNF6	ENSG00000133466
chr22	37199430	37199440	ETV6	MA0645.1	C1QTNF6	ENSG00000133466
chr5	91380339	91380349	ETV6	MA0645.1	ARRDC3	ENSG00000113369
chr5	141960961	141960971	ETV6	MA0645.1	PCDH12	ENSG00000113555
chr5	151081025	151081035	ETV6	MA0645.1	TNIP1	ENSG00000145901
chr6	106097978	106097988	ETV6	MA0645.1	PRDM1	ENSG00000057657
chr8	125429900	125429910	ETV6	MA0645.1	TRIB1	ENSG00000173334
chrX	55452051	55452061	ETV6	MA0645.1	MAGEH1	ENSG00000187601
chrX	55452078	55452088	ETV6	MA0645.1	MAGEH1	ENSG00000187601
chr1	89843633	89843643	FLI1	MA0475.2	LRRC8D	ENSG00000171492
chr1	89871051	89871061	FLI1	MA0475.2	LRRC8D	ENSG00000171492
chr10	3782817	3782827	FLI1	MA0475.2	KLF6	ENSG00000067082
chr10	6051173	6051183	FLI1	MA0475.2	IL2RA	ENSG00000134460
chr10	18204134	18204144	FLI1	MA0475.2	CACNB2	ENSG00000165995
chr22	37199430	37199440	FLI1	MA0475.2	C1QTNF6	ENSG00000133466
chr5	141960961	141960971	FLI1	MA0475.2	PCDH12	ENSG00000113555
chr6	106097978	106097988	FLI1	MA0475.2	PRDM1	ENSG00000057657
chrX	55452051	55452061	FLI1	MA0475.2	MAGEH1	ENSG00000187601
chr1	159924635	159924646	FOS	MA0476.1	TAGLN2	ENSG00000158710
chr1	221712406	221712417	FOS	MA0476.1	DUSP10	ENSG00000143507
chr1	235642536	235642547	FOS	MA0476.1	GNG4	ENSG00000168243
chr10	3783071	3783082	FOS	MA0476.1	KLF6	ENSG00000067082
chr10	6052803	6052814	FOS	MA0476.1	IL2RA	ENSG00000134460
chr11	44569325	44569336	FOS	MA0476.1	CD82	ENSG00000085117
chr11	46380522	46380533	FOS	MA0476.1	MDK	ENSG00000110492
chr12	10213471	10213482	FOS	MA0476.1	GABARAPL1	ENSG00000139112
chr15	60582592	60582603	FOS	MA0476.1	RORA	ENSG00000069667
chr17	28897897	28897908	FOS	MA0476.1	FLOT2	ENSG00000132589
chr18	3448427	3448438	FOS	MA0476.1	TGIF1	ENSG00000177426
chr18	13375413	13375424	FOS	MA0476.1	LDLRAD4	ENSG00000168675
chr18	13375476	13375487	FOS	MA0476.1	LDLRAD4	ENSG00000168675
chr2	213151350	213151361	FOS	MA0476.1	IKZF2	ENSG00000030419
chr3	16457141	16457152	FOS	MA0476.1	RFTN1	ENSG00000131378
chr5	141973999	141974010	FOS	MA0476.1	PCDH12	ENSG00000113555
chr5	151078962	151078973	FOS	MA0476.1	TNIP1	ENSG00000145901
chr6	446971	446982	FOS	MA0476.1	IRF4	ENSG00000137265
chr6	106098896	106098907	FOS	MA0476.1	PRDM1	ENSG00000057657
chr6	137866299	137866310	FOS	MA0476.1	TNFAIP3	ENSG00000118503
chr6	137866971	137866982	FOS	MA0476.1	TNFAIP3	ENSG00000118503
chr6	137873292	137873303	FOS	MA0476.1	TNFAIP3	ENSG00000118503
chr6	138107511	138107522	FOS	MA0476.1	PERP	ENSG00000112378
chr8	125430280	125430291	FOS	MA0476.1	TRIB1	ENSG00000173334
chr8	125434806	125434817	FOS	MA0476.1	TRIB1	ENSG00000173334
chr1	159924636	159924647	FOSL2	MA0478.1	TAGLN2	ENSG00000158710
chr1	221712405	221712416	FOSL2	MA0478.1	DUSP10	ENSG00000143507
chr1	235642537	235642548	FOSL2	MA0478.1	GNG4	ENSG00000168243
chr10	3783072	3783083	FOSL2	MA0478.1	KLF6	ENSG00000067082
chr10	6052802	6052813	FOSL2	MA0478.1	IL2RA	ENSG00000134460
chr10	30434129	30434140	FOSL2	MA0478.1	MAP3K8	ENSG00000107968
chr11	44569326	44569337	FOSL2	MA0478.1	CD82	ENSG00000085117
chr11	46380521	46380532	FOSL2	MA0478.1	MDK	ENSG00000110492
chr12	10212366	10212377	FOSL2	MA0478.1	GABARAPL1	ENSG00000139112
chr12	10213470	10213481	FOSL2	MA0478.1	GABARAPL1	ENSG00000139112
chr15	60582591	60582602	FOSL2	MA0478.1	RORA	ENSG00000069667
chr17	28897898	28897909	FOSL2	MA0478.1	FLOT2	ENSG00000132589
chr18	13375414	13375425	FOSL2	MA0478.1	LDLRAD4	ENSG00000168675
chr18	13375475	13375486	FOSL2	MA0478.1	LDLRAD4	ENSG00000168675
chr3	16457140	16457151	FOSL2	MA0478.1	RFTN1	ENSG00000131378
chr5	141974000	141974011	FOSL2	MA0478.1	PCDH12	ENSG00000113555
chr5	151078961	151078972	FOSL2	MA0478.1	TNIP1	ENSG00000145901
chr6	137866300	137866311	FOSL2	MA0478.1	TNFAIP3	ENSG00000118503
chr6	137866970	137866981	FOSL2	MA0478.1	TNFAIP3	ENSG00000118503
chr6	137873291	137873302	FOSL2	MA0478.1	TNFAIP3	ENSG00000118503
chr6	138107510	138107521	FOSL2	MA0478.1	PERP	ENSG00000112378
chr8	125430279	125430290	FOSL2	MA0478.1	TRIB1	ENSG00000173334
chr8	125434805	125434816	FOSL2	MA0478.1	TRIB1	ENSG00000173334
chr1	61077205	61077219	FOXK1	MA0852.2	NFIA	ENSG00000162599
chr1	89871100	89871114	FOXK1	MA0852.2	LRRC8D	ENSG00000171492
chr1	89871209	89871223	FOXK1	MA0852.2	LRRC8D	ENSG00000171492
chr1	159925798	159925812	FOXK1	MA0852.2	TAGLN2	ENSG00000158710
chr1	221712505	221712519	FOXK1	MA0852.2	DUSP10	ENSG00000143507
chr1	221742377	221742391	FOXK1	MA0852.2	DUSP10	ENSG00000143507
chr1	235642493	235642507	FOXK1	MA0852.2	GNG4	ENSG00000168243
chr10	3805534	3805548	FOXK1	MA0852.2	KLF6	ENSG00000067082
chr10	6051146	6051160	FOXK1	MA0852.2	IL2RA	ENSG00000134460
chr10	18400433	18400447	FOXK1	MA0852.2	CACNB2	ENSG00000165995
chr10	30434041	30434055	FOXK1	MA0852.2	MAP3K8	ENSG00000107968
chr11	44569189	44569203	FOXK1	MA0852.2	CD82	ENSG00000085117
chr11	46380504	46380518	FOXK1	MA0852.2	MDK	ENSG00000110492
chr12	10212375	10212389	FOXK1	MA0852.2	GABARAPL1	ENSG00000139112
chr12	92030900	92030914	FOXK1	MA0852.2	LINC01619	ENSG00000257242
chr12	92065170	92065184	FOXK1	MA0852.2	LINC01619	ENSG00000257242
chr12	121802157	121802171	FOXK1	MA0852.2	LINC01089	ENSG00000212694
chr13	40666956	40666970	FOXK1	MA0852.2	FOXO1	ENSG00000150907
chr15	60592593	60592607	FOXK1	MA0852.2	RORA	ENSG00000069667
chr17	28897287	28897301	FOXK1	MA0852.2	FLOT2	ENSG00000132589
chr18	3448936	3448950	FOXK1	MA0852.2	TGIF1	ENSG00000177426
chr18	3449182	3449196	FOXK1	MA0852.2	TGIF1	ENSG00000177426
chr18	13612310	13612324	FOXK1	MA0852.2	LDLRAD4	ENSG00000168675
chr18	62715208	62715222	FOXK1	MA0852.2	PHLPP1	ENSG00000081913
chr19	38427534	38427548	FOXK1	MA0852.2	RASGRP4	ENSG00000171777
chr2	213145946	213145960	FOXK1	MA0852.2	IKZF2	ENSG00000030419
chr22	37198527	37198541	FOXK1	MA0852.2	C1QTNF6	ENSG00000133466
chr22	39145764	39145778	FOXK1	MA0852.2	CBX7	ENSG00000100307
chr22	39145807	39145821	FOXK1	MA0852.2	CBX7	ENSG00000100307
chr3	16377542	16377556	FOXK1	MA0852.2	RFTN1	ENSG00000131378
chr3	16462924	16462938	FOXK1	MA0852.2	RFTN1	ENSG00000131378
chr4	89111137	89111151	FOXK1	MA0852.2	TIGD2	ENSG00000180346
chr4	103076037	103076051	FOXK1	MA0852.2	SLC9B2	ENSG00000164038
chr5	72956037	72956051	FOXK1	MA0852.2	FCHO2	ENSG00000157107
chr5	91380116	91380130	FOXK1	MA0852.2	ARRDC3	ENSG00000113369
chr5	91380640	91380654	FOXK1	MA0852.2	ARRDC3	ENSG00000113369
chr5	151081153	151081167	FOXK1	MA0852.2	TNIP1	ENSG00000145901
chr6	399977	399991	FOXK1	MA0852.2	IRF4	ENSG00000137265
chr6	106097841	106097855	FOXK1	MA0852.2	PRDM1	ENSG00000057657
chr6	106098008	106098022	FOXK1	MA0852.2	PRDM1	ENSG00000057657
chr6	137870933	137870947	FOXK1	MA0852.2	TNFAIP3	ENSG00000118503
chr6	137877686	137877700	FOXK1	MA0852.2	TNFAIP3	ENSG00000118503
chr6	138107569	138107583	FOXK1	MA0852.2	PERP	ENSG00000112378
chr7	135147961	135147975	FOXK1	MA0852.2	TMEM140	ENSG00000146859
chr7	135148074	135148088	FOXK1	MA0852.2	TMEM140	ENSG00000146859
chr8	29350936	29350950	FOXK1	MA0852.2	DUSP4	ENSG00000120875
chr8	125430237	125430251	FOXK1	MA0852.2	TRIB1	ENSG00000173334
chr9	99821284	99821298	FOXK1	MA0852.2	NR4A3	ENSG00000119508
chrX	55452229	55452243	FOXK1	MA0852.2	MAGEH1	ENSG00000187601
chr1	61077206	61077217	FOXK2	MA1103.2	NFIA	ENSG00000162599
chr1	89871102	89871113	FOXK2	MA1103.2	LRRC8D	ENSG00000171492
chr1	89871211	89871222	FOXK2	MA1103.2	LRRC8D	ENSG00000171492
chr1	159925800	159925811	FOXK2	MA1103.2	TAGLN2	ENSG00000158710
chr1	192575544	192575555	FOXK2	MA1103.2	RGS1	ENSG00000090104
chr1	192575697	192575708	FOXK2	MA1103.2	RGS1	ENSG00000090104
chr1	221712506	221712517	FOXK2	MA1103.2	DUSP10	ENSG00000143507
chr1	221742379	221742390	FOXK2	MA1103.2	DUSP10	ENSG00000143507
chr1	235642494	235642505	FOXK2	MA1103.2	GNG4	ENSG00000168243
chr10	3805536	3805547	FOXK2	MA1103.2	KLF6	ENSG00000067082
chr10	6051147	6051158	FOXK2	MA1103.2	IL2RA	ENSG00000134460
chr10	18400435	18400446	FOXK2	MA1103.2	CACNB2	ENSG00000165995
chr10	30434043	30434054	FOXK2	MA1103.2	MAP3K8	ENSG00000107968
chr11	44569190	44569201	FOXK2	MA1103.2	CD82	ENSG00000085117
chr11	46380506	46380517	FOXK2	MA1103.2	MDK	ENSG00000110492
chr12	10212377	10212388	FOXK2	MA1103.2	GABARAPL1	ENSG00000139112
chr12	56032139	56032150	FOXK2	MA1103.2	IKZF4	ENSG00000123411
chr12	92030902	92030913	FOXK2	MA1103.2	LINC01619	ENSG00000257242
chr12	92065171	92065182	FOXK2	MA1103.2	LINC01619	ENSG00000257242
chr12	92065400	92065411	FOXK2	MA1103.2	LINC01619	ENSG00000257242
chr12	121802158	121802169	FOXK2	MA1103.2	LINC01089	ENSG00000212694
chr13	40666958	40666969	FOXK2	MA1103.2	FOXO1	ENSG00000150907
chr15	60592595	60592606	FOXK2	MA1103.2	RORA	ENSG00000069667
chr17	28897288	28897299	FOXK2	MA1103.2	FLOT2	ENSG00000132589
chr18	3448938	3448949	FOXK2	MA1103.2	TGIF1	ENSG00000177426
chr18	3449184	3449195	FOXK2	MA1103.2	TGIF1	ENSG00000177426
chr18	13612311	13612322	FOXK2	MA1103.2	LDLRAD4	ENSG00000168675
chr18	62715210	62715221	FOXK2	MA1103.2	PHLPP1	ENSG00000081913
chr19	38427535	38427546	FOXK2	MA1103.2	RASGRP4	ENSG00000171777
chr2	213145948	213145959	FOXK2	MA1103.2	IKZF2	ENSG00000030419
chr22	37198528	37198539	FOXK2	MA1103.2	C1QTNF6	ENSG00000133466
chr22	39145765	39145776	FOXK2	MA1103.2	CBX7	ENSG00000100307
chr22	39145808	39145819	FOXK2	MA1103.2	CBX7	ENSG00000100307
chr3	16377543	16377554	FOXK2	MA1103.2	RFTN1	ENSG00000131378
chr3	16457219	16457230	FOXK2	MA1103.2	RFTN1	ENSG00000131378
chr4	89111138	89111149	FOXK2	MA1103.2	TIGD2	ENSG00000180346
chr4	103076038	103076049	FOXK2	MA1103.2	SLC9B2	ENSG00000164038
chr5	72956039	72956050	FOXK2	MA1103.2	FCHO2	ENSG00000157107
chr5	91380117	91380128	FOXK2	MA1103.2	ARRDC3	ENSG00000113369
chr5	141974124	141974135	FOXK2	MA1103.2	PCDH12	ENSG00000113555
chr5	151081154	151081165	FOXK2	MA1103.2	TNIP1	ENSG00000145901
chr6	399978	399989	FOXK2	MA1103.2	IRF4	ENSG00000137265
chr6	106097842	106097853	FOXK2	MA1103.2	PRDM1	ENSG00000057657
chr6	106098010	106098021	FOXK2	MA1103.2	PRDM1	ENSG00000057657
chr6	137877688	137877699	FOXK2	MA1103.2	TNFAIP3	ENSG00000118503
chr6	138107570	138107581	FOXK2	MA1103.2	PERP	ENSG00000112378
chr7	30134785	30134796	FOXK2	MA1103.2	MTURN	ENSG00000180354
chr7	30134997	30135008	FOXK2	MA1103.2	MTURN	ENSG00000180354
chr7	135147963	135147974	FOXK2	MA1103.2	TMEM140	ENSG00000146859
chr7	135148076	135148087	FOXK2	MA1103.2	TMEM140	ENSG00000146859
chr8	29350543	29350554	FOXK2	MA1103.2	DUSP4	ENSG00000120875
chr8	29350937	29350948	FOXK2	MA1103.2	DUSP4	ENSG00000120875
chr8	125430239	125430250	FOXK2	MA1103.2	TRIB1	ENSG00000173334
chr9	99821285	99821296	FOXK2	MA1103.2	NR4A3	ENSG00000119508
chrX	55452231	55452242	FOXK2	MA1103.2	MAGEH1	ENSG00000187601
chr1	61077208	61077216	FOXN3	MA1489.1	NFIA	ENSG00000162599
chr1	89871103	89871111	FOXN3	MA1489.1	LRRC8D	ENSG00000171492
chr1	89871212	89871220	FOXN3	MA1489.1	LRRC8D	ENSG00000171492
chr1	221709222	221709230	FOXN3	MA1489.1	DUSP10	ENSG00000143507
chr1	221712508	221712516	FOXN3	MA1489.1	DUSP10	ENSG00000143507
chr1	235642496	235642504	FOXN3	MA1489.1	GNG4	ENSG00000168243
chr10	3805268	3805276	FOXN3	MA1489.1	KLF6	ENSG00000067082
chr10	3805537	3805545	FOXN3	MA1489.1	KLF6	ENSG00000067082
chr11	44569192	44569200	FOXN3	MA1489.1	CD82	ENSG00000085117
chr11	46380507	46380515	FOXN3	MA1489.1	MDK	ENSG00000110492
chr12	92065173	92065181	FOXN3	MA1489.1	LINC01619	ENSG00000257242
chr12	92065402	92065410	FOXN3	MA1489.1	LINC01619	ENSG00000257242
chr12	121801957	121801965	FOXN3	MA1489.1	LINC01089	ENSG00000212694
chr12	121802160	121802168	FOXN3	MA1489.1	LINC01089	ENSG00000212694
chr13	40666959	40666967	FOXN3	MA1489.1	FOXO1	ENSG00000150907
chr15	60580900	60580908	FOXN3	MA1489.1	RORA	ENSG00000069667
chr18	3448939	3448947	FOXN3	MA1489.1	TGIF1	ENSG00000177426
chr18	3451412	3451420	FOXN3	MA1489.1	TGIF1	ENSG00000177426
chr18	62715211	62715219	FOXN3	MA1489.1	PHLPP1	ENSG00000081913
chr18	62869710	62869718	FOXN3	MA1489.1	PHLPP1	ENSG00000081913
chr18	62869861	62869869	FOXN3	MA1489.1	PHLPP1	ENSG00000081913
chr22	37198530	37198538	FOXN3	MA1489.1	C1QTNF6	ENSG00000133466
chr22	39145810	39145818	FOXN3	MA1489.1	CBX7	ENSG00000100307
chr3	16462927	16462935	FOXN3	MA1489.1	RFTN1	ENSG00000131378
chr5	91380119	91380127	FOXN3	MA1489.1	ARRDC3	ENSG00000113369
chr5	91380643	91380651	FOXN3	MA1489.1	ARRDC3	ENSG00000113369
chr5	141974025	141974033	FOXN3	MA1489.1	PCDH12	ENSG00000113555
chr6	106097844	106097852	FOXN3	MA1489.1	PRDM1	ENSG00000057657
chr6	137877689	137877697	FOXN3	MA1489.1	TNFAIP3	ENSG00000118503
chr7	30134786	30134794	FOXN3	MA1489.1	MTURN	ENSG00000180354
chr7	135147964	135147972	FOXN3	MA1489.1	TMEM140	ENSG00000146859
chr9	99821175	99821183	FOXN3	MA1489.1	NR4A3	ENSG00000119508
chrX	55452232	55452240	FOXN3	MA1489.1	MAGEH1	ENSG00000187601
chr1	61077208	61077216	FOXO3	MA0157.2	NFIA	ENSG00000162599
chr1	89871103	89871111	FOXO3	MA0157.2	LRRC8D	ENSG00000171492
chr1	89871212	89871220	FOXO3	MA0157.2	LRRC8D	ENSG00000171492
chr1	221712508	221712516	FOXO3	MA0157.2	DUSP10	ENSG00000143507
chr1	221726530	221726538	FOXO3	MA0157.2	DUSP10	ENSG00000143507
chr1	235642496	235642504	FOXO3	MA0157.2	GNG4	ENSG00000168243
chr10	3805537	3805545	FOXO3	MA0157.2	KLF6	ENSG00000067082
chr10	6051149	6051157	FOXO3	MA0157.2	IL2RA	ENSG00000134460
chr10	18400436	18400444	FOXO3	MA0157.2	CACNB2	ENSG00000165995
chr10	30434044	30434052	FOXO3	MA0157.2	MAP3K8	ENSG00000107968
chr11	44569192	44569200	FOXO3	MA0157.2	CD82	ENSG00000085117
chr11	46380507	46380515	FOXO3	MA0157.2	MDK	ENSG00000110492
chr12	92030903	92030911	FOXO3	MA0157.2	LINC01619	ENSG00000257242
chr12	92065173	92065181	FOXO3	MA0157.2	LINC01619	ENSG00000257242
chr12	121802160	121802168	FOXO3	MA0157.2	LINC01089	ENSG00000212694
chr13	40666959	40666967	FOXO3	MA0157.2	FOXO1	ENSG00000150907
chr15	60592596	60592604	FOXO3	MA0157.2	RORA	ENSG00000069667
chr18	3449185	3449193	FOXO3	MA0157.2	TGIF1	ENSG00000177426
chr18	13612313	13612321	FOXO3	MA0157.2	LDLRAD4	ENSG00000168675
chr18	62715211	62715219	FOXO3	MA0157.2	PHLPP1	ENSG00000081913
chr18	62869861	62869869	FOXO3	MA0157.2	PHLPP1	ENSG00000081913
chr19	38427537	38427545	FOXO3	MA0157.2	RASGRP4	ENSG00000171777
chr22	37198530	37198538	FOXO3	MA0157.2	C1QTNF6	ENSG00000133466
chr22	39145810	39145818	FOXO3	MA0157.2	CBX7	ENSG00000100307
chr3	16377545	16377553	FOXO3	MA0157.2	RFTN1	ENSG00000131378
chr4	89111140	89111148	FOXO3	MA0157.2	TIGD2	ENSG00000180346
chr4	103076040	103076048	FOXO3	MA0157.2	SLC9B2	ENSG00000164038
chr5	72956040	72956048	FOXO3	MA0157.2	FCHO2	ENSG00000157107
chr5	91380119	91380127	FOXO3	MA0157.2	ARRDC3	ENSG00000113369
chr5	141974126	141974134	FOXO3	MA0157.2	PCDH12	ENSG00000113555
chr5	151081156	151081164	FOXO3	MA0157.2	TNIP1	ENSG00000145901
chr6	106097844	106097852	FOXO3	MA0157.2	PRDM1	ENSG00000057657
chr6	106098011	106098019	FOXO3	MA0157.2	PRDM1	ENSG00000057657
chr6	137877689	137877697	FOXO3	MA0157.2	TNFAIP3	ENSG00000118503
chr6	138107572	138107580	FOXO3	MA0157.2	PERP	ENSG00000112378
chr7	30134999	30135007	FOXO3	MA0157.2	MTURN	ENSG00000180354
chr7	135147964	135147972	FOXO3	MA0157.2	TMEM140	ENSG00000146859
chr7	135148077	135148085	FOXO3	MA0157.2	TMEM140	ENSG00000146859
chr8	29350544	29350552	FOXO3	MA0157.2	DUSP4	ENSG00000120875
chr8	29350939	29350947	FOXO3	MA0157.2	DUSP4	ENSG00000120875
chr8	125430240	125430248	FOXO3	MA0157.2	TRIB1	ENSG00000173334
chr9	99821287	99821295	FOXO3	MA0157.2	NR4A3	ENSG00000119508
chrX	55452232	55452240	FOXO3	MA0157.2	MAGEH1	ENSG00000187601
chr1	61077208	61077215	FOXO4	MA0848.1	NFIA	ENSG00000162599
chr1	89871104	89871111	FOXO4	MA0848.1	LRRC8D	ENSG00000171492
chr1	89871213	89871220	FOXO4	MA0848.1	LRRC8D	ENSG00000171492
chr1	159925802	159925809	FOXO4	MA0848.1	TAGLN2	ENSG00000158710
chr1	192575699	192575706	FOXO4	MA0848.1	RGS1	ENSG00000090104
chr1	221712508	221712515	FOXO4	MA0848.1	DUSP10	ENSG00000143507
chr1	235642496	235642503	FOXO4	MA0848.1	GNG4	ENSG00000168243
chr10	3805538	3805545	FOXO4	MA0848.1	KLF6	ENSG00000067082
chr10	6051149	6051156	FOXO4	MA0848.1	IL2RA	ENSG00000134460
chr10	18400437	18400444	FOXO4	MA0848.1	CACNB2	ENSG00000165995
chr10	30434045	30434052	FOXO4	MA0848.1	MAP3K8	ENSG00000107968
chr11	44569192	44569199	FOXO4	MA0848.1	CD82	ENSG00000085117
chr11	46380508	46380515	FOXO4	MA0848.1	MDK	ENSG00000110492
chr12	10212379	10212386	FOXO4	MA0848.1	GABARAPL1	ENSG00000139112
chr12	56032141	56032148	FOXO4	MA0848.1	IKZF4	ENSG00000123411
chr12	92030904	92030911	FOXO4	MA0848.1	LINC01619	ENSG00000257242
chr12	92065173	92065180	FOXO4	MA0848.1	LINC01619	ENSG00000257242
chr12	121802160	121802167	FOXO4	MA0848.1	LINC01089	ENSG00000212694
chr13	40666960	40666967	FOXO4	MA0848.1	FOXO1	ENSG00000150907
chr15	60592597	60592604	FOXO4	MA0848.1	RORA	ENSG00000069667
chr17	28897290	28897297	FOXO4	MA0848.1	FLOT2	ENSG00000132589
chr18	3449186	3449193	FOXO4	MA0848.1	TGIF1	ENSG00000177426
chr18	13612313	13612320	FOXO4	MA0848.1	LDLRAD4	ENSG00000168675
chr18	62715212	62715219	FOXO4	MA0848.1	PHLPP1	ENSG00000081913
chr19	38427537	38427544	FOXO4	MA0848.1	RASGRP4	ENSG00000171777
chr2	213145950	213145957	FOXO4	MA0848.1	IKZF2	ENSG00000030419
chr22	37198530	37198537	FOXO4	MA0848.1	C1QTNF6	ENSG00000133466
chr22	39145767	39145774	FOXO4	MA0848.1	CBX7	ENSG00000100307
chr22	39145810	39145817	FOXO4	MA0848.1	CBX7	ENSG00000100307
chr3	16377545	16377552	FOXO4	MA0848.1	RFTN1	ENSG00000131378
chr3	16457221	16457228	FOXO4	MA0848.1	RFTN1	ENSG00000131378
chr4	89111140	89111147	FOXO4	MA0848.1	TIGD2	ENSG00000180346
chr4	103076040	103076047	FOXO4	MA0848.1	SLC9B2	ENSG00000164038
chr5	72956041	72956048	FOXO4	MA0848.1	FCHO2	ENSG00000157107
chr5	91380119	91380126	FOXO4	MA0848.1	ARRDC3	ENSG00000113369
chr5	141974126	141974133	FOXO4	MA0848.1	PCDH12	ENSG00000113555
chr5	151081156	151081163	FOXO4	MA0848.1	TNIP1	ENSG00000145901
chr6	399980	399987	FOXO4	MA0848.1	IRF4	ENSG00000137265
chr6	41733083	41733090	FOXO4	MA0848.1	TFEB	ENSG00000112561
chr6	106097844	106097851	FOXO4	MA0848.1	PRDM1	ENSG00000057657
chr6	106098012	106098019	FOXO4	MA0848.1	PRDM1	ENSG00000057657
chr6	137877690	137877697	FOXO4	MA0848.1	TNFAIP3	ENSG00000118503
chr6	138107572	138107579	FOXO4	MA0848.1	PERP	ENSG00000112378
chr7	30134999	30135006	FOXO4	MA0848.1	MTURN	ENSG00000180354
chr7	135147965	135147972	FOXO4	MA0848.1	TMEM140	ENSG00000146859
chr7	135148078	135148085	FOXO4	MA0848.1	TMEM140	ENSG00000146859
chr8	29350545	29350552	FOXO4	MA0848.1	DUSP4	ENSG00000120875
chr8	29350939	29350946	FOXO4	MA0848.1	DUSP4	ENSG00000120875
chr8	125430241	125430248	FOXO4	MA0848.1	TRIB1	ENSG00000173334
chr9	99821287	99821294	FOXO4	MA0848.1	NR4A3	ENSG00000119508
chrX	55452233	55452240	FOXO4	MA0848.1	MAGEH1	ENSG00000187601
chr1	61077206	61077217	FOXP1	MA0481.3	NFIA	ENSG00000162599
chr1	89871102	89871113	FOXP1	MA0481.3	LRRC8D	ENSG00000171492
chr1	89871211	89871222	FOXP1	MA0481.3	LRRC8D	ENSG00000171492
chr1	192575544	192575555	FOXP1	MA0481.3	RGS1	ENSG00000090104
chr1	192575697	192575708	FOXP1	MA0481.3	RGS1	ENSG00000090104
chr1	221742379	221742390	FOXP1	MA0481.3	DUSP10	ENSG00000143507
chr10	3805536	3805547	FOXP1	MA0481.3	KLF6	ENSG00000067082
chr10	6051147	6051158	FOXP1	MA0481.3	IL2RA	ENSG00000134460
chr10	18204246	18204257	FOXP1	MA0481.3	CACNB2	ENSG00000165995
chr10	18400435	18400446	FOXP1	MA0481.3	CACNB2	ENSG00000165995
chr10	30434043	30434054	FOXP1	MA0481.3	MAP3K8	ENSG00000107968
chr11	44569190	44569201	FOXP1	MA0481.3	CD82	ENSG00000085117
chr11	46380506	46380517	FOXP1	MA0481.3	MDK	ENSG00000110492
chr12	92030902	92030913	FOXP1	MA0481.3	LINC01619	ENSG00000257242
chr12	92065171	92065182	FOXP1	MA0481.3	LINC01619	ENSG00000257242
chr12	92065400	92065411	FOXP1	MA0481.3	LINC01619	ENSG00000257242
chr12	121802158	121802169	FOXP1	MA0481.3	LINC01089	ENSG00000212694
chr13	40666958	40666969	FOXP1	MA0481.3	FOXO1	ENSG00000150907
chr15	60592595	60592606	FOXP1	MA0481.3	RORA	ENSG00000069667
chr17	28897288	28897299	FOXP1	MA0481.3	FLOT2	ENSG00000132589
chr18	3449184	3449195	FOXP1	MA0481.3	TGIF1	ENSG00000177426
chr18	13612311	13612322	FOXP1	MA0481.3	LDLRAD4	ENSG00000168675
chr18	62715210	62715221	FOXP1	MA0481.3	PHLPP1	ENSG00000081913
chr19	38427535	38427546	FOXP1	MA0481.3	RASGRP4	ENSG00000171777
chr2	213145948	213145959	FOXP1	MA0481.3	IKZF2	ENSG00000030419
chr22	37198528	37198539	FOXP1	MA0481.3	C1QTNF6	ENSG00000133466
chr22	39145808	39145819	FOXP1	MA0481.3	CBX7	ENSG00000100307
chr3	16377543	16377554	FOXP1	MA0481.3	RFTN1	ENSG00000131378
chr3	16457219	16457230	FOXP1	MA0481.3	RFTN1	ENSG00000131378
chr4	89111138	89111149	FOXP1	MA0481.3	TIGD2	ENSG00000180346
chr4	103076038	103076049	FOXP1	MA0481.3	SLC9B2	ENSG00000164038
chr5	72956039	72956050	FOXP1	MA0481.3	FCHO2	ENSG00000157107
chr5	91380117	91380128	FOXP1	MA0481.3	ARRDC3	ENSG00000113369
chr5	141974124	141974135	FOXP1	MA0481.3	PCDH12	ENSG00000113555
chr5	151081154	151081165	FOXP1	MA0481.3	TNIP1	ENSG00000145901
chr6	399978	399989	FOXP1	MA0481.3	IRF4	ENSG00000137265
chr6	106097842	106097853	FOXP1	MA0481.3	PRDM1	ENSG00000057657
chr6	106098010	106098021	FOXP1	MA0481.3	PRDM1	ENSG00000057657
chr6	138107570	138107581	FOXP1	MA0481.3	PERP	ENSG00000112378
chr7	30134785	30134796	FOXP1	MA0481.3	MTURN	ENSG00000180354
chr7	30134997	30135008	FOXP1	MA0481.3	MTURN	ENSG00000180354
chr7	135147963	135147974	FOXP1	MA0481.3	TMEM140	ENSG00000146859
chr7	135148076	135148087	FOXP1	MA0481.3	TMEM140	ENSG00000146859
chr8	29350543	29350554	FOXP1	MA0481.3	DUSP4	ENSG00000120875
chr8	29350937	29350948	FOXP1	MA0481.3	DUSP4	ENSG00000120875
chr8	125430239	125430250	FOXP1	MA0481.3	TRIB1	ENSG00000173334
chr9	99821285	99821296	FOXP1	MA0481.3	NR4A3	ENSG00000119508
chrX	55452231	55452242	FOXP1	MA0481.3	MAGEH1	ENSG00000187601
chr1	61077208	61077215	FOXP3	MA0850.1	NFIA	ENSG00000162599
chr1	89871104	89871111	FOXP3	MA0850.1	LRRC8D	ENSG00000171492
chr1	89871213	89871220	FOXP3	MA0850.1	LRRC8D	ENSG00000171492
chr1	159925802	159925809	FOXP3	MA0850.1	TAGLN2	ENSG00000158710
chr1	192575699	192575706	FOXP3	MA0850.1	RGS1	ENSG00000090104
chr1	221712508	221712515	FOXP3	MA0850.1	DUSP10	ENSG00000143507
chr1	235642496	235642503	FOXP3	MA0850.1	GNG4	ENSG00000168243
chr10	3805538	3805545	FOXP3	MA0850.1	KLF6	ENSG00000067082
chr10	6051149	6051156	FOXP3	MA0850.1	IL2RA	ENSG00000134460
chr10	18400437	18400444	FOXP3	MA0850.1	CACNB2	ENSG00000165995
chr10	30434045	30434052	FOXP3	MA0850.1	MAP3K8	ENSG00000107968
chr11	44569192	44569199	FOXP3	MA0850.1	CD82	ENSG00000085117
chr11	46380508	46380515	FOXP3	MA0850.1	MDK	ENSG00000110492
chr12	10212379	10212386	FOXP3	MA0850.1	GABARAPL1	ENSG00000139112
chr12	56032141	56032148	FOXP3	MA0850.1	IKZF4	ENSG00000123411
chr12	92030904	92030911	FOXP3	MA0850.1	LINC01619	ENSG00000257242
chr12	92065173	92065180	FOXP3	MA0850.1	LINC01619	ENSG00000257242
chr12	121802160	121802167	FOXP3	MA0850.1	LINC01089	ENSG00000212694
chr13	40666960	40666967	FOXP3	MA0850.1	FOXO1	ENSG00000150907
chr15	60592597	60592604	FOXP3	MA0850.1	RORA	ENSG00000069667
chr17	28897290	28897297	FOXP3	MA0850.1	FLOT2	ENSG00000132589
chr18	3449186	3449193	FOXP3	MA0850.1	TGIF1	ENSG00000177426
chr18	13612313	13612320	FOXP3	MA0850.1	LDLRAD4	ENSG00000168675
chr18	62715212	62715219	FOXP3	MA0850.1	PHLPP1	ENSG00000081913
chr19	38427537	38427544	FOXP3	MA0850.1	RASGRP4	ENSG00000171777
chr2	213145950	213145957	FOXP3	MA0850.1	IKZF2	ENSG00000030419
chr22	37198530	37198537	FOXP3	MA0850.1	C1QTNF6	ENSG00000133466
chr22	39145767	39145774	FOXP3	MA0850.1	CBX7	ENSG00000100307
chr22	39145810	39145817	FOXP3	MA0850.1	CBX7	ENSG00000100307
chr3	16377545	16377552	FOXP3	MA0850.1	RFTN1	ENSG00000131378
chr3	16457221	16457228	FOXP3	MA0850.1	RFTN1	ENSG00000131378
chr4	89111140	89111147	FOXP3	MA0850.1	TIGD2	ENSG00000180346
chr4	103076040	103076047	FOXP3	MA0850.1	SLC9B2	ENSG00000164038
chr5	72956041	72956048	FOXP3	MA0850.1	FCHO2	ENSG00000157107
chr5	91380119	91380126	FOXP3	MA0850.1	ARRDC3	ENSG00000113369
chr5	141974126	141974133	FOXP3	MA0850.1	PCDH12	ENSG00000113555
chr5	151081156	151081163	FOXP3	MA0850.1	TNIP1	ENSG00000145901
chr6	399980	399987	FOXP3	MA0850.1	IRF4	ENSG00000137265
chr6	41733083	41733090	FOXP3	MA0850.1	TFEB	ENSG00000112561
chr6	106097844	106097851	FOXP3	MA0850.1	PRDM1	ENSG00000057657
chr6	106098012	106098019	FOXP3	MA0850.1	PRDM1	ENSG00000057657
chr6	137877690	137877697	FOXP3	MA0850.1	TNFAIP3	ENSG00000118503
chr6	138107572	138107579	FOXP3	MA0850.1	PERP	ENSG00000112378
chr7	30134999	30135006	FOXP3	MA0850.1	MTURN	ENSG00000180354
chr7	135147965	135147972	FOXP3	MA0850.1	TMEM140	ENSG00000146859
chr7	135148078	135148085	FOXP3	MA0850.1	TMEM140	ENSG00000146859
chr8	29350545	29350552	FOXP3	MA0850.1	DUSP4	ENSG00000120875
chr8	29350939	29350946	FOXP3	MA0850.1	DUSP4	ENSG00000120875
chr8	125430241	125430248	FOXP3	MA0850.1	TRIB1	ENSG00000173334
chr9	99821287	99821294	FOXP3	MA0850.1	NR4A3	ENSG00000119508
chrX	55452233	55452240	FOXP3	MA0850.1	MAGEH1	ENSG00000187601
chr10	18400585	18400593	GATA3	MA0037.3	CACNB2	ENSG00000165995
chr5	91384976	91384984	GATA3	MA0037.3	ARRDC3	ENSG00000113369
chr6	404110	404118	GATA3	MA0037.3	IRF4	ENSG00000137265
chr6	137873641	137873649	GATA3	MA0037.3	TNFAIP3	ENSG00000118503
chr1	61077192	61077204	GFI1	MA0038.2	NFIA	ENSG00000162599
chr10	3783081	3783093	GFI1	MA0038.2	KLF6	ENSG00000067082
chr10	3785480	3785492	GFI1	MA0038.2	KLF6	ENSG00000067082
chr11	44569109	44569121	GFI1	MA0038.2	CD82	ENSG00000085117
chr15	60580670	60580682	GFI1	MA0038.2	RORA	ENSG00000069667
chr18	3451482	3451494	GFI1	MA0038.2	TGIF1	ENSG00000177426
chr18	62869695	62869707	GFI1	MA0038.2	PHLPP1	ENSG00000081913
chr3	16512044	16512056	GFI1	MA0038.2	RFTN1	ENSG00000131378
chr6	403889	403901	GFI1	MA0038.2	IRF4	ENSG00000137265
chr6	404925	404937	GFI1	MA0038.2	IRF4	ENSG00000137265
chr6	137873399	137873411	GFI1	MA0038.2	TNFAIP3	ENSG00000118503
chr8	125429915	125429923	GMEB2	MA0862.1	TRIB1	ENSG00000173334
chr1	221742758	221742768	HES1	MA1099.2	DUSP10	ENSG00000143507
chr10	3785540	3785550	HES1	MA1099.2	KLF6	ENSG00000067082
chr12	92065198	92065208	HES1	MA1099.2	LINC01619	ENSG00000257242
chr18	3449373	3449383	HES1	MA1099.2	TGIF1	ENSG00000177426
chr18	13217351	13217361	HES1	MA1099.2	LDLRAD4	ENSG00000168675
chr22	39145689	39145699	HES1	MA1099.2	CBX7	ENSG00000100307
chr22	39145776	39145786	HES1	MA1099.2	CBX7	ENSG00000100307
chr4	103076047	103076057	HES1	MA1099.2	SLC9B2	ENSG00000164038
chr6	41735161	41735171	HES1	MA1099.2	TFEB	ENSG00000112561
chr1	89843287	89843296	HIC2	MA0738.1	LRRC8D	ENSG00000171492
chr1	221709171	221709180	HIC2	MA0738.1	DUSP10	ENSG00000143507
chr10	18400523	18400532	HIC2	MA0738.1	CACNB2	ENSG00000165995
chr12	92065245	92065254	HIC2	MA0738.1	LINC01619	ENSG00000257242
chr13	40666707	40666716	HIC2	MA0738.1	FOXO1	ENSG00000150907
chr6	403847	403856	HIC2	MA0738.1	IRF4	ENSG00000137265
chr6	41735046	41735055	HIC2	MA0738.1	TFEB	ENSG00000112561
chr6	137866705	137866714	HIC2	MA0738.1	TNFAIP3	ENSG00000118503
chr1	159925556	159925568	HINFP	MA0131.2	TAGLN2	ENSG00000158710
chr1	221742672	221742684	HINFP	MA0131.2	DUSP10	ENSG00000143507
chr12	10213010	10213022	HINFP	MA0131.2	GABARAPL1	ENSG00000139112
chr18	3448483	3448495	HINFP	MA0131.2	TGIF1	ENSG00000177426
chr2	213152030	213152042	HINFP	MA0131.2	IKZF2	ENSG00000030419
chr22	37198544	37198556	HINFP	MA0131.2	C1QTNF6	ENSG00000133466
chr7	135148079	135148089	HMBOX1	MA0895.1	TMEM140	ENSG00000146859
chr10	3782349	3782357	HOXB2	MA0902.2	KLF6	ENSG00000067082
chr18	13216524	13216532	HOXB2	MA0902.2	LDLRAD4	ENSG00000168675
chr6	41733071	41733079	HOXB2	MA0902.2	TFEB	ENSG00000112561
chr10	3782348	3782358	HOXB3	MA0903.1	KLF6	ENSG00000067082
chr1	159924117	159924130	HSF1	MA0486.2	TAGLN2	ENSG00000158710
chr10	3805449	3805462	HSF1	MA0486.2	KLF6	ENSG00000067082
chr10	3805462	3805475	HSF1	MA0486.2	KLF6	ENSG00000067082
chr10	6051374	6051387	HSF1	MA0486.2	IL2RA	ENSG00000134460
chr18	3451284	3451297	HSF1	MA0486.2	TGIF1	ENSG00000177426
chr6	391716	391729	HSF1	MA0486.2	IRF4	ENSG00000137265
chr1	89871146	89871159	HSF2	MA0770.1	LRRC8D	ENSG00000171492
chr1	159924117	159924130	HSF2	MA0770.1	TAGLN2	ENSG00000158710
chr1	159924242	159924255	HSF2	MA0770.1	TAGLN2	ENSG00000158710
chr10	3805449	3805462	HSF2	MA0770.1	KLF6	ENSG00000067082
chr10	6051374	6051387	HSF2	MA0770.1	IL2RA	ENSG00000134460
chr12	10213184	10213197	HSF2	MA0770.1	GABARAPL1	ENSG00000139112
chr13	40666875	40666888	HSF2	MA0770.1	FOXO1	ENSG00000150907
chr18	3451284	3451297	HSF2	MA0770.1	TGIF1	ENSG00000177426
chr5	141974104	141974117	HSF2	MA0770.1	PCDH12	ENSG00000113555
chr6	391716	391729	HSF2	MA0770.1	IRF4	ENSG00000137265
chr1	89843630	89843642	IKZF1	MA1508.1	LRRC8D	ENSG00000171492
chr1	89855815	89855827	IKZF1	MA1508.1	LRRC8D	ENSG00000171492
chr1	89871052	89871064	IKZF1	MA1508.1	LRRC8D	ENSG00000171492
chr1	159923168	159923180	IKZF1	MA1508.1	TAGLN2	ENSG00000158710
chr1	159923751	159923763	IKZF1	MA1508.1	TAGLN2	ENSG00000158710
chr1	159925853	159925865	IKZF1	MA1508.1	TAGLN2	ENSG00000158710
chr1	192575714	192575726	IKZF1	MA1508.1	RGS1	ENSG00000090104
chr1	192580678	192580690	IKZF1	MA1508.1	RGS1	ENSG00000090104
chr1	235642357	235642369	IKZF1	MA1508.1	GNG4	ENSG00000168243
chr10	3782818	3782830	IKZF1	MA1508.1	KLF6	ENSG00000067082
chr10	6052830	6052842	IKZF1	MA1508.1	IL2RA	ENSG00000134460
chr10	30434039	30434051	IKZF1	MA1508.1	MAP3K8	ENSG00000107968
chr11	44569360	44569372	IKZF1	MA1508.1	CD82	ENSG00000085117
chr12	10213170	10213182	IKZF1	MA1508.1	GABARAPL1	ENSG00000139112
chr12	92030836	92030848	IKZF1	MA1508.1	LINC01619	ENSG00000257242
chr12	121801960	121801972	IKZF1	MA1508.1	LINC01089	ENSG00000212694
chr12	121801978	121801990	IKZF1	MA1508.1	LINC01089	ENSG00000212694
chr15	60580751	60580763	IKZF1	MA1508.1	RORA	ENSG00000069667
chr17	28897293	28897305	IKZF1	MA1508.1	FLOT2	ENSG00000132589
chr18	3448960	3448972	IKZF1	MA1508.1	TGIF1	ENSG00000177426
chr18	3449172	3449184	IKZF1	MA1508.1	TGIF1	ENSG00000177426
chr18	13382446	13382458	IKZF1	MA1508.1	LDLRAD4	ENSG00000168675
chr18	13382557	13382569	IKZF1	MA1508.1	LDLRAD4	ENSG00000168675
chr18	62869767	62869779	IKZF1	MA1508.1	PHLPP1	ENSG00000081913
chr4	103076071	103076083	IKZF1	MA1508.1	SLC9B2	ENSG00000164038
chr5	141960958	141960970	IKZF1	MA1508.1	PCDH12	ENSG00000113555
chr6	399891	399903	IKZF1	MA1508.1	IRF4	ENSG00000137265
chr6	404944	404956	IKZF1	MA1508.1	IRF4	ENSG00000137265
chr6	41732982	41732994	IKZF1	MA1508.1	TFEB	ENSG00000112561
chr6	106097975	106097987	IKZF1	MA1508.1	PRDM1	ENSG00000057657
chr6	106098039	106098051	IKZF1	MA1508.1	PRDM1	ENSG00000057657
chr6	137866905	137866917	IKZF1	MA1508.1	TNFAIP3	ENSG00000118503
chr8	29340284	29340296	IKZF1	MA1508.1	DUSP4	ENSG00000120875
chrX	55452079	55452091	IKZF1	MA1508.1	MAGEH1	ENSG00000187601
chr1	89843259	89843280	IRF1	MA0050.2	LRRC8D	ENSG00000171492
chr1	159923163	159923184	IRF1	MA0050.2	TAGLN2	ENSG00000158710
chr1	159923441	159923462	IRF1	MA0050.2	TAGLN2	ENSG00000158710
chr1	159923724	159923745	IRF1	MA0050.2	TAGLN2	ENSG00000158710
chr1	192575542	192575563	IRF1	MA0050.2	RGS1	ENSG00000090104
chr1	192575618	192575639	IRF1	MA0050.2	RGS1	ENSG00000090104
chr1	221726445	221726466	IRF1	MA0050.2	DUSP10	ENSG00000143507
chr1	221726527	221726548	IRF1	MA0050.2	DUSP10	ENSG00000143507
chr1	221741964	221741985	IRF1	MA0050.2	DUSP10	ENSG00000143507
chr1	221742085	221742106	IRF1	MA0050.2	DUSP10	ENSG00000143507
chr1	235642352	235642373	IRF1	MA0050.2	GNG4	ENSG00000168243
chr10	3776005	3776026	IRF1	MA0050.2	KLF6	ENSG00000067082
chr10	3777124	3777145	IRF1	MA0050.2	KLF6	ENSG00000067082
chr10	3805488	3805509	IRF1	MA0050.2	KLF6	ENSG00000067082
chr10	30434052	30434073	IRF1	MA0050.2	MAP3K8	ENSG00000107968
chr11	44565257	44565278	IRF1	MA0050.2	CD82	ENSG00000085117
chr11	46380541	46380562	IRF1	MA0050.2	MDK	ENSG00000110492
chr12	121801956	121801977	IRF1	MA0050.2	LINC01089	ENSG00000212694
chr12	121803254	121803275	IRF1	MA0050.2	LINC01089	ENSG00000212694
chr13	40666809	40666830	IRF1	MA0050.2	FOXO1	ENSG00000150907
chr13	40666833	40666854	IRF1	MA0050.2	FOXO1	ENSG00000150907
chr18	3448955	3448976	IRF1	MA0050.2	TGIF1	ENSG00000177426
chr18	3449198	3449219	IRF1	MA0050.2	TGIF1	ENSG00000177426
chr18	13216556	13216577	IRF1	MA0050.2	LDLRAD4	ENSG00000168675
chr18	13217880	13217901	IRF1	MA0050.2	LDLRAD4	ENSG00000168675
chr18	62869749	62869770	IRF1	MA0050.2	PHLPP1	ENSG00000081913
chr2	213015939	213015960	IRF1	MA0050.2	IKZF2	ENSG00000030419
chr2	213151568	213151589	IRF1	MA0050.2	IKZF2	ENSG00000030419
chr22	37186524	37186545	IRF1	MA0050.2	C1QTNF6	ENSG00000133466
chr22	37199195	37199216	IRF1	MA0050.2	C1QTNF6	ENSG00000133466
chr22	39144556	39144577	IRF1	MA0050.2	CBX7	ENSG00000100307
chr3	16512010	16512031	IRF1	MA0050.2	RFTN1	ENSG00000131378
chr4	103075990	103076011	IRF1	MA0050.2	SLC9B2	ENSG00000164038
chr5	91380033	91380054	IRF1	MA0050.2	ARRDC3	ENSG00000113369
chr5	141960953	141960974	IRF1	MA0050.2	PCDH12	ENSG00000113555
chr5	141974031	141974052	IRF1	MA0050.2	PCDH12	ENSG00000113555
chr5	141974167	141974188	IRF1	MA0050.2	PCDH12	ENSG00000113555
chr6	404940	404961	IRF1	MA0050.2	IRF4	ENSG00000137265
chr6	106097887	106097908	IRF1	MA0050.2	PRDM1	ENSG00000057657
chr6	137866895	137866916	IRF1	MA0050.2	TNFAIP3	ENSG00000118503
chr6	137873353	137873374	IRF1	MA0050.2	TNFAIP3	ENSG00000118503
chr6	137873499	137873520	IRF1	MA0050.2	TNFAIP3	ENSG00000118503
chr6	137873604	137873625	IRF1	MA0050.2	TNFAIP3	ENSG00000118503
chr6	137882684	137882705	IRF1	MA0050.2	TNFAIP3	ENSG00000118503
chr7	135148013	135148034	IRF1	MA0050.2	TMEM140	ENSG00000146859
chr8	125429550	125429571	IRF1	MA0050.2	TRIB1	ENSG00000173334
chr1	159923259	159923277	IRF2	MA0051.1	TAGLN2	ENSG00000158710
chr1	159923439	159923457	IRF2	MA0051.1	TAGLN2	ENSG00000158710
chr1	159924079	159924097	IRF2	MA0051.1	TAGLN2	ENSG00000158710
chr1	221726531	221726549	IRF2	MA0051.1	DUSP10	ENSG00000143507
chr1	221742084	221742102	IRF2	MA0051.1	DUSP10	ENSG00000143507
chr10	6051218	6051236	IRF2	MA0051.1	IL2RA	ENSG00000134460
chr12	10213169	10213187	IRF2	MA0051.1	GABARAPL1	ENSG00000139112
chr12	121803430	121803448	IRF2	MA0051.1	LINC01089	ENSG00000212694
chr18	13217884	13217902	IRF2	MA0051.1	LDLRAD4	ENSG00000168675
chr18	13375622	13375640	IRF2	MA0051.1	LDLRAD4	ENSG00000168675
chr22	37186528	37186546	IRF2	MA0051.1	C1QTNF6	ENSG00000133466
chr22	37199193	37199211	IRF2	MA0051.1	C1QTNF6	ENSG00000133466
chr22	39144560	39144578	IRF2	MA0051.1	CBX7	ENSG00000100307
chr5	91380032	91380050	IRF2	MA0051.1	ARRDC3	ENSG00000113369
chr5	91380523	91380541	IRF2	MA0051.1	ARRDC3	ENSG00000113369
chr6	41733646	41733664	IRF2	MA0051.1	TFEB	ENSG00000112561
chr6	137866887	137866905	IRF2	MA0051.1	TNFAIP3	ENSG00000118503
chr6	137882683	137882701	IRF2	MA0051.1	TNFAIP3	ENSG00000118503
chr7	135148017	135148035	IRF2	MA0051.1	TMEM140	ENSG00000146859
chr8	125429547	125429565	IRF2	MA0051.1	TRIB1	ENSG00000173334
chr1	159923160	159923181	IRF3	MA1418.1	TAGLN2	ENSG00000158710
chr1	221709337	221709358	IRF3	MA1418.1	DUSP10	ENSG00000143507
chr1	221726448	221726469	IRF3	MA1418.1	DUSP10	ENSG00000143507
chr1	221726524	221726545	IRF3	MA1418.1	DUSP10	ENSG00000143507
chr1	221742088	221742109	IRF3	MA1418.1	DUSP10	ENSG00000143507
chr10	3805485	3805506	IRF3	MA1418.1	KLF6	ENSG00000067082
chr10	30434056	30434077	IRF3	MA1418.1	MAP3K8	ENSG00000107968
chr11	46380537	46380558	IRF3	MA1418.1	MDK	ENSG00000110492
chr12	10213169	10213190	IRF3	MA1418.1	GABARAPL1	ENSG00000139112
chr12	92056022	92056043	IRF3	MA1418.1	LINC01619	ENSG00000257242
chr18	3448952	3448973	IRF3	MA1418.1	TGIF1	ENSG00000177426
chr18	13216553	13216574	IRF3	MA1418.1	LDLRAD4	ENSG00000168675
chr18	62869752	62869773	IRF3	MA1418.1	PHLPP1	ENSG00000081913
chr19	38426378	38426399	IRF3	MA1418.1	RASGRP4	ENSG00000171777
chr22	37199192	37199213	IRF3	MA1418.1	C1QTNF6	ENSG00000133466
chr22	39144553	39144574	IRF3	MA1418.1	CBX7	ENSG00000100307
chr3	16462878	16462899	IRF3	MA1418.1	RFTN1	ENSG00000131378
chr5	91380036	91380057	IRF3	MA1418.1	ARRDC3	ENSG00000113369
chr5	91380527	91380548	IRF3	MA1418.1	ARRDC3	ENSG00000113369
chr5	141974028	141974049	IRF3	MA1418.1	PCDH12	ENSG00000113555
chr6	137866898	137866919	IRF3	MA1418.1	TNFAIP3	ENSG00000118503
chr6	137882687	137882708	IRF3	MA1418.1	TNFAIP3	ENSG00000118503
chr7	135148010	135148031	IRF3	MA1418.1	TMEM140	ENSG00000146859
chr7	135148131	135148152	IRF3	MA1418.1	TMEM140	ENSG00000146859
chr8	125429546	125429567	IRF3	MA1418.1	TRIB1	ENSG00000173334
chr1	221726530	221726545	IRF4	MA1419.1	DUSP10	ENSG00000143507
chr10	3805491	3805506	IRF4	MA1419.1	KLF6	ENSG00000067082
chr10	6051222	6051237	IRF4	MA1419.1	IL2RA	ENSG00000134460
chr18	3449201	3449216	IRF4	MA1419.1	TGIF1	ENSG00000177426
chr19	38426378	38426393	IRF4	MA1419.1	RASGRP4	ENSG00000171777
chr2	213015942	213015957	IRF4	MA1419.1	IKZF2	ENSG00000030419
chr22	39144559	39144574	IRF4	MA1419.1	CBX7	ENSG00000100307
chr6	137873356	137873371	IRF4	MA1419.1	TNFAIP3	ENSG00000118503
chr7	135148016	135148031	IRF4	MA1419.1	TMEM140	ENSG00000146859
chr1	89866031	89866045	IRF5	MA1420.1	LRRC8D	ENSG00000171492
chr10	18204185	18204199	IRF5	MA1420.1	CACNB2	ENSG00000165995
chr18	13217251	13217265	IRF5	MA1420.1	LDLRAD4	ENSG00000168675
chr19	38426379	38426393	IRF5	MA1420.1	RASGRP4	ENSG00000171777
chr22	39144559	39144573	IRF5	MA1420.1	CBX7	ENSG00000100307
chr5	91380399	91380413	IRF5	MA1420.1	ARRDC3	ENSG00000113369
chr1	159923438	159923452	IRF7	MA0772.1	TAGLN2	ENSG00000158710
chr1	192575546	192575560	IRF7	MA0772.1	RGS1	ENSG00000090104
chr1	221726448	221726462	IRF7	MA0772.1	DUSP10	ENSG00000143507
chr1	221726530	221726544	IRF7	MA0772.1	DUSP10	ENSG00000143507
chr1	221742089	221742103	IRF7	MA0772.1	DUSP10	ENSG00000143507
chr10	3776009	3776023	IRF7	MA0772.1	KLF6	ENSG00000067082
chr10	3805491	3805505	IRF7	MA0772.1	KLF6	ENSG00000067082
chr10	6051223	6051237	IRF7	MA0772.1	IL2RA	ENSG00000134460
chr11	44565260	44565274	IRF7	MA0772.1	CD82	ENSG00000085117
chr13	40666813	40666827	IRF7	MA0772.1	FOXO1	ENSG00000150907
chr18	3449109	3449123	IRF7	MA0772.1	TGIF1	ENSG00000177426
chr19	38426379	38426393	IRF7	MA0772.1	RASGRP4	ENSG00000171777
chr2	213015942	213015956	IRF7	MA0772.1	IKZF2	ENSG00000030419
chr22	37199198	37199212	IRF7	MA0772.1	C1QTNF6	ENSG00000133466
chr22	39144559	39144573	IRF7	MA0772.1	CBX7	ENSG00000100307
chr4	103075993	103076007	IRF7	MA0772.1	SLC9B2	ENSG00000164038
chr5	91380399	91380413	IRF7	MA0772.1	ARRDC3	ENSG00000113369
chr5	141974034	141974048	IRF7	MA0772.1	PCDH12	ENSG00000113555
chr6	389888	389902	IRF7	MA0772.1	IRF4	ENSG00000137265
chr6	137873356	137873370	IRF7	MA0772.1	TNFAIP3	ENSG00000118503
chr6	137882688	137882702	IRF7	MA0772.1	TNFAIP3	ENSG00000118503
chr7	135148016	135148030	IRF7	MA0772.1	TMEM140	ENSG00000146859
chr1	221726530	221726544	IRF8	MA0652.1	DUSP10	ENSG00000143507
chr10	6051223	6051237	IRF8	MA0652.1	IL2RA	ENSG00000134460
chr11	44565254	44565268	IRF8	MA0652.1	CD82	ENSG00000085117
chr18	3449109	3449123	IRF8	MA0652.1	TGIF1	ENSG00000177426
chr18	3449202	3449216	IRF8	MA0652.1	TGIF1	ENSG00000177426
chr19	38426379	38426393	IRF8	MA0652.1	RASGRP4	ENSG00000171777
chr2	213015942	213015956	IRF8	MA0652.1	IKZF2	ENSG00000030419
chr22	37199198	37199212	IRF8	MA0652.1	C1QTNF6	ENSG00000133466
chr22	39144559	39144573	IRF8	MA0652.1	CBX7	ENSG00000100307
chr5	91380399	91380413	IRF8	MA0652.1	ARRDC3	ENSG00000113369
chr6	137873356	137873370	IRF8	MA0652.1	TNFAIP3	ENSG00000118503
chr7	135148016	135148030	IRF8	MA0652.1	TMEM140	ENSG00000146859
chr1	159924425	159924440	IRF9	MA0653.1	TAGLN2	ENSG00000158710
chr1	192575546	192575561	IRF9	MA0653.1	RGS1	ENSG00000090104
chr1	221726463	221726478	IRF9	MA0653.1	DUSP10	ENSG00000143507
chr1	221726529	221726544	IRF9	MA0653.1	DUSP10	ENSG00000143507
chr1	221742089	221742104	IRF9	MA0653.1	DUSP10	ENSG00000143507
chr10	3805490	3805505	IRF9	MA0653.1	KLF6	ENSG00000067082
chr10	6051223	6051238	IRF9	MA0653.1	IL2RA	ENSG00000134460
chr10	18204184	18204199	IRF9	MA0653.1	CACNB2	ENSG00000165995
chr18	3449202	3449217	IRF9	MA0653.1	TGIF1	ENSG00000177426
chr18	62869753	62869768	IRF9	MA0653.1	PHLPP1	ENSG00000081913
chr19	38426379	38426394	IRF9	MA0653.1	RASGRP4	ENSG00000171777
chr2	213015941	213015956	IRF9	MA0653.1	IKZF2	ENSG00000030419
chr22	37199197	37199212	IRF9	MA0653.1	C1QTNF6	ENSG00000133466
chr22	39144558	39144573	IRF9	MA0653.1	CBX7	ENSG00000100307
chr6	106097995	106098010	IRF9	MA0653.1	PRDM1	ENSG00000057657
chr6	137873355	137873370	IRF9	MA0653.1	TNFAIP3	ENSG00000118503
chr6	137882688	137882703	IRF9	MA0653.1	TNFAIP3	ENSG00000118503
chr7	135148015	135148030	IRF9	MA0653.1	TMEM140	ENSG00000146859
chr1	61453281	61453294	JUN	MA0488.1	NFIA	ENSG00000162599
chr1	159923430	159923443	JUN	MA0488.1	TAGLN2	ENSG00000158710
chr1	159925248	159925261	JUN	MA0488.1	TAGLN2	ENSG00000158710
chr1	221709101	221709114	JUN	MA0488.1	DUSP10	ENSG00000143507
chr1	221709163	221709176	JUN	MA0488.1	DUSP10	ENSG00000143507
chr1	221709259	221709272	JUN	MA0488.1	DUSP10	ENSG00000143507
chr1	221712430	221712443	JUN	MA0488.1	DUSP10	ENSG00000143507
chr1	221742245	221742258	JUN	MA0488.1	DUSP10	ENSG00000143507
chr1	221742310	221742323	JUN	MA0488.1	DUSP10	ENSG00000143507
chr10	3775997	3776010	JUN	MA0488.1	KLF6	ENSG00000067082
chr10	3785369	3785382	JUN	MA0488.1	KLF6	ENSG00000067082
chr11	44565216	44565229	JUN	MA0488.1	CD82	ENSG00000085117
chr12	10212842	10212855	JUN	MA0488.1	GABARAPL1	ENSG00000139112
chr12	92030771	92030784	JUN	MA0488.1	LINC01619	ENSG00000257242
chr12	92056004	92056017	JUN	MA0488.1	LINC01619	ENSG00000257242
chr2	213147754	213147767	JUN	MA0488.1	IKZF2	ENSG00000030419
chr6	41733063	41733076	JUN	MA0488.1	TFEB	ENSG00000112561
chr7	30134667	30134680	JUN	MA0488.1	MTURN	ENSG00000180354
chr7	30134729	30134742	JUN	MA0488.1	MTURN	ENSG00000180354
chr7	135148038	135148051	JUN	MA0488.1	TMEM140	ENSG00000146859
chr7	135148508	135148521	JUN	MA0488.1	TMEM140	ENSG00000146859
chr9	99821789	99821802	JUN	MA0488.1	NR4A3	ENSG00000119508
chr1	159924634	159924647	JUNB	MA0490.2	TAGLN2	ENSG00000158710
chr1	221712405	221712418	JUNB	MA0490.2	DUSP10	ENSG00000143507
chr1	235642535	235642548	JUNB	MA0490.2	GNG4	ENSG00000168243
chr10	3783070	3783083	JUNB	MA0490.2	KLF6	ENSG00000067082
chr10	6052802	6052815	JUNB	MA0490.2	IL2RA	ENSG00000134460
chr11	46380521	46380534	JUNB	MA0490.2	MDK	ENSG00000110492
chr12	10213470	10213483	JUNB	MA0490.2	GABARAPL1	ENSG00000139112
chr15	60582591	60582604	JUNB	MA0490.2	RORA	ENSG00000069667
chr17	28897896	28897909	JUNB	MA0490.2	FLOT2	ENSG00000132589
chr18	3448426	3448439	JUNB	MA0490.2	TGIF1	ENSG00000177426
chr18	13375412	13375425	JUNB	MA0490.2	LDLRAD4	ENSG00000168675
chr18	13375475	13375488	JUNB	MA0490.2	LDLRAD4	ENSG00000168675
chr19	38427598	38427611	JUNB	MA0490.2	RASGRP4	ENSG00000171777
chr5	141973998	141974011	JUNB	MA0490.2	PCDH12	ENSG00000113555
chr5	141974132	141974145	JUNB	MA0490.2	PCDH12	ENSG00000113555
chr5	151078961	151078974	JUNB	MA0490.2	TNIP1	ENSG00000145901
chr6	137866298	137866311	JUNB	MA0490.2	TNFAIP3	ENSG00000118503
chr6	137866970	137866983	JUNB	MA0490.2	TNFAIP3	ENSG00000118503
chr8	125429616	125429629	JUNB	MA0490.2	TRIB1	ENSG00000173334
chr8	125434805	125434818	JUNB	MA0490.2	TRIB1	ENSG00000173334
chr1	159924634	159924647	JUND	MA0491.2	TAGLN2	ENSG00000158710
chr1	221712405	221712418	JUND	MA0491.2	DUSP10	ENSG00000143507
chr1	235642535	235642548	JUND	MA0491.2	GNG4	ENSG00000168243
chr10	3783070	3783083	JUND	MA0491.2	KLF6	ENSG00000067082
chr10	6052802	6052815	JUND	MA0491.2	IL2RA	ENSG00000134460
chr11	44569324	44569337	JUND	MA0491.2	CD82	ENSG00000085117
chr11	46380521	46380534	JUND	MA0491.2	MDK	ENSG00000110492
chr12	10213470	10213483	JUND	MA0491.2	GABARAPL1	ENSG00000139112
chr15	60582591	60582604	JUND	MA0491.2	RORA	ENSG00000069667
chr18	3448426	3448439	JUND	MA0491.2	TGIF1	ENSG00000177426
chr18	13375412	13375425	JUND	MA0491.2	LDLRAD4	ENSG00000168675
chr18	13375475	13375488	JUND	MA0491.2	LDLRAD4	ENSG00000168675
chr18	62717365	62717378	JUND	MA0491.2	PHLPP1	ENSG00000081913
chr19	38427598	38427611	JUND	MA0491.2	RASGRP4	ENSG00000171777
chr5	141973998	141974011	JUND	MA0491.2	PCDH12	ENSG00000113555
chr5	141974132	141974145	JUND	MA0491.2	PCDH12	ENSG00000113555
chr5	151078961	151078974	JUND	MA0491.2	TNIP1	ENSG00000145901
chr6	137866298	137866311	JUND	MA0491.2	TNFAIP3	ENSG00000118503
chr6	137866970	137866983	JUND	MA0491.2	TNFAIP3	ENSG00000118503
chr6	138107510	138107523	JUND	MA0491.2	PERP	ENSG00000112378
chr8	125429616	125429629	JUND	MA0491.2	TRIB1	ENSG00000173334
chr8	125434805	125434818	JUND	MA0491.2	TRIB1	ENSG00000173334
chr1	61078137	61078148	KLF10	MA1511.1	NFIA	ENSG00000162599
chr1	159924597	159924608	KLF10	MA1511.1	TAGLN2	ENSG00000158710
chr1	159925795	159925806	KLF10	MA1511.1	TAGLN2	ENSG00000158710
chr1	221742239	221742250	KLF10	MA1511.1	DUSP10	ENSG00000143507
chr1	221742967	221742978	KLF10	MA1511.1	DUSP10	ENSG00000143507
chr10	3777239	3777250	KLF10	MA1511.1	KLF6	ENSG00000067082
chr10	6051040	6051051	KLF10	MA1511.1	IL2RA	ENSG00000134460
chr10	6062488	6062499	KLF10	MA1511.1	IL2RA	ENSG00000134460
chr11	44565210	44565221	KLF10	MA1511.1	CD82	ENSG00000085117
chr11	44565403	44565414	KLF10	MA1511.1	CD82	ENSG00000085117
chr11	44565501	44565512	KLF10	MA1511.1	CD82	ENSG00000085117
chr11	44565549	44565560	KLF10	MA1511.1	CD82	ENSG00000085117
chr11	44565567	44565578	KLF10	MA1511.1	CD82	ENSG00000085117
chr11	44565582	44565593	KLF10	MA1511.1	CD82	ENSG00000085117
chr12	10212822	10212833	KLF10	MA1511.1	GABARAPL1	ENSG00000139112
chr15	60592684	60592695	KLF10	MA1511.1	RORA	ENSG00000069667
chr18	13217663	13217674	KLF10	MA1511.1	LDLRAD4	ENSG00000168675
chr18	13612539	13612550	KLF10	MA1511.1	LDLRAD4	ENSG00000168675
chr18	13612574	13612585	KLF10	MA1511.1	LDLRAD4	ENSG00000168675
chr18	62715454	62715465	KLF10	MA1511.1	PHLPP1	ENSG00000081913
chr2	213152036	213152047	KLF10	MA1511.1	IKZF2	ENSG00000030419
chr22	37198800	37198811	KLF10	MA1511.1	C1QTNF6	ENSG00000133466
chr22	39145648	39145659	KLF10	MA1511.1	CBX7	ENSG00000100307
chr22	39152676	39152687	KLF10	MA1511.1	CBX7	ENSG00000100307
chr22	39152747	39152758	KLF10	MA1511.1	CBX7	ENSG00000100307
chr22	39152764	39152775	KLF10	MA1511.1	CBX7	ENSG00000100307
chr4	89111398	89111409	KLF10	MA1511.1	TIGD2	ENSG00000180346
chr4	89111480	89111491	KLF10	MA1511.1	TIGD2	ENSG00000180346
chr4	103075966	103075977	KLF10	MA1511.1	SLC9B2	ENSG00000164038
chr5	91380315	91380326	KLF10	MA1511.1	ARRDC3	ENSG00000113369
chr5	151081054	151081065	KLF10	MA1511.1	TNIP1	ENSG00000145901
chr6	404097	404108	KLF10	MA1511.1	IRF4	ENSG00000137265
chr6	41683726	41683737	KLF10	MA1511.1	TFEB	ENSG00000112561
chr6	41734822	41734833	KLF10	MA1511.1	TFEB	ENSG00000112561
chr6	137867337	137867348	KLF10	MA1511.1	TNFAIP3	ENSG00000118503
chr6	137873448	137873459	KLF10	MA1511.1	TNFAIP3	ENSG00000118503
chr7	30135181	30135192	KLF10	MA1511.1	MTURN	ENSG00000180354
chr8	125430022	125430033	KLF10	MA1511.1	TRIB1	ENSG00000173334
chr9	99822050	99822061	KLF10	MA1511.1	NR4A3	ENSG00000119508
chr1	61078137	61078148	KLF11	MA1512.1	NFIA	ENSG00000162599
chr1	159924597	159924608	KLF11	MA1512.1	TAGLN2	ENSG00000158710
chr1	159925795	159925806	KLF11	MA1512.1	TAGLN2	ENSG00000158710
chr1	221742227	221742238	KLF11	MA1512.1	DUSP10	ENSG00000143507
chr1	221742239	221742250	KLF11	MA1512.1	DUSP10	ENSG00000143507
chr1	221742967	221742978	KLF11	MA1512.1	DUSP10	ENSG00000143507
chr10	3777239	3777250	KLF11	MA1512.1	KLF6	ENSG00000067082
chr10	6062488	6062499	KLF11	MA1512.1	IL2RA	ENSG00000134460
chr10	6062547	6062558	KLF11	MA1512.1	IL2RA	ENSG00000134460
chr11	44565210	44565221	KLF11	MA1512.1	CD82	ENSG00000085117
chr11	44565403	44565414	KLF11	MA1512.1	CD82	ENSG00000085117
chr11	44565501	44565512	KLF11	MA1512.1	CD82	ENSG00000085117
chr11	44565549	44565560	KLF11	MA1512.1	CD82	ENSG00000085117
chr11	44565567	44565578	KLF11	MA1512.1	CD82	ENSG00000085117
chr11	44565582	44565593	KLF11	MA1512.1	CD82	ENSG00000085117
chr12	10212822	10212833	KLF11	MA1512.1	GABARAPL1	ENSG00000139112
chr12	10213262	10213273	KLF11	MA1512.1	GABARAPL1	ENSG00000139112
chr12	56007833	56007844	KLF11	MA1512.1	IKZF4	ENSG00000123411
chr15	60592684	60592695	KLF11	MA1512.1	RORA	ENSG00000069667
chr18	13217663	13217674	KLF11	MA1512.1	LDLRAD4	ENSG00000168675
chr18	13612539	13612550	KLF11	MA1512.1	LDLRAD4	ENSG00000168675
chr18	62715183	62715194	KLF11	MA1512.1	PHLPP1	ENSG00000081913
chr18	62715454	62715465	KLF11	MA1512.1	PHLPP1	ENSG00000081913
chr2	213152036	213152047	KLF11	MA1512.1	IKZF2	ENSG00000030419
chr22	37198800	37198811	KLF11	MA1512.1	C1QTNF6	ENSG00000133466
chr22	39145648	39145659	KLF11	MA1512.1	CBX7	ENSG00000100307
chr22	39152676	39152687	KLF11	MA1512.1	CBX7	ENSG00000100307
chr22	39152747	39152758	KLF11	MA1512.1	CBX7	ENSG00000100307
chr22	39152764	39152775	KLF11	MA1512.1	CBX7	ENSG00000100307
chr4	89111143	89111154	KLF11	MA1512.1	TIGD2	ENSG00000180346
chr4	89111480	89111491	KLF11	MA1512.1	TIGD2	ENSG00000180346
chr4	103075966	103075977	KLF11	MA1512.1	SLC9B2	ENSG00000164038
chr5	91380315	91380326	KLF11	MA1512.1	ARRDC3	ENSG00000113369
chr6	400067	400078	KLF11	MA1512.1	IRF4	ENSG00000137265
chr6	446960	446971	KLF11	MA1512.1	IRF4	ENSG00000137265
chr6	41734795	41734806	KLF11	MA1512.1	TFEB	ENSG00000112561
chr6	41734822	41734833	KLF11	MA1512.1	TFEB	ENSG00000112561
chr6	41734847	41734858	KLF11	MA1512.1	TFEB	ENSG00000112561
chr6	41734998	41735009	KLF11	MA1512.1	TFEB	ENSG00000112561
chr6	137867337	137867348	KLF11	MA1512.1	TNFAIP3	ENSG00000118503
chr6	137873448	137873459	KLF11	MA1512.1	TNFAIP3	ENSG00000118503
chr7	30134803	30134814	KLF11	MA1512.1	MTURN	ENSG00000180354
chr8	29350797	29350808	KLF11	MA1512.1	DUSP4	ENSG00000120875
chr8	29350816	29350827	KLF11	MA1512.1	DUSP4	ENSG00000120875
chr8	29350836	29350847	KLF11	MA1512.1	DUSP4	ENSG00000120875
chr8	125429892	125429903	KLF11	MA1512.1	TRIB1	ENSG00000173334
chr8	125430022	125430033	KLF11	MA1512.1	TRIB1	ENSG00000173334
chr9	99821912	99821923	KLF11	MA1512.1	NR4A3	ENSG00000119508
chr1	61078132	61078150	KLF13	MA0657.1	NFIA	ENSG00000162599
chr1	159925790	159925808	KLF13	MA0657.1	TAGLN2	ENSG00000158710
chr1	221742965	221742983	KLF13	MA0657.1	DUSP10	ENSG00000143507
chr10	6062545	6062563	KLF13	MA0657.1	IL2RA	ENSG00000134460
chr11	44565205	44565223	KLF13	MA0657.1	CD82	ENSG00000085117
chr11	44565496	44565514	KLF13	MA0657.1	CD82	ENSG00000085117
chr11	44565562	44565580	KLF13	MA0657.1	CD82	ENSG00000085117
chr2	213119311	213119329	KLF13	MA0657.1	IKZF2	ENSG00000030419
chr22	39152745	39152763	KLF13	MA0657.1	CBX7	ENSG00000100307
chr3	16467624	16467642	KLF13	MA0657.1	RFTN1	ENSG00000131378
chr4	103075964	103075982	KLF13	MA0657.1	SLC9B2	ENSG00000164038
chr6	137873446	137873464	KLF13	MA0657.1	TNFAIP3	ENSG00000118503
chrX	55452095	55452113	KLF13	MA0657.1	MAGEH1	ENSG00000187601
chr1	61078137	61078148	KLF16	MA0741.1	NFIA	ENSG00000162599
chr1	89843236	89843247	KLF16	MA0741.1	LRRC8D	ENSG00000171492
chr1	159924597	159924608	KLF16	MA0741.1	TAGLN2	ENSG00000158710
chr1	159925795	159925806	KLF16	MA0741.1	TAGLN2	ENSG00000158710
chr1	221742227	221742238	KLF16	MA0741.1	DUSP10	ENSG00000143507
chr1	221742967	221742978	KLF16	MA0741.1	DUSP10	ENSG00000143507
chr1	235642203	235642214	KLF16	MA0741.1	GNG4	ENSG00000168243
chr10	3777239	3777250	KLF16	MA0741.1	KLF6	ENSG00000067082
chr11	44565210	44565221	KLF16	MA0741.1	CD82	ENSG00000085117
chr11	44565403	44565414	KLF16	MA0741.1	CD82	ENSG00000085117
chr11	44565501	44565512	KLF16	MA0741.1	CD82	ENSG00000085117
chr11	44565549	44565560	KLF16	MA0741.1	CD82	ENSG00000085117
chr11	44565567	44565578	KLF16	MA0741.1	CD82	ENSG00000085117
chr11	44565582	44565593	KLF16	MA0741.1	CD82	ENSG00000085117
chr12	10212822	10212833	KLF16	MA0741.1	GABARAPL1	ENSG00000139112
chr12	10213262	10213273	KLF16	MA0741.1	GABARAPL1	ENSG00000139112
chr12	56007833	56007844	KLF16	MA0741.1	IKZF4	ENSG00000123411
chr15	60592684	60592695	KLF16	MA0741.1	RORA	ENSG00000069667
chr18	3448241	3448252	KLF16	MA0741.1	TGIF1	ENSG00000177426
chr18	3448702	3448713	KLF16	MA0741.1	TGIF1	ENSG00000177426
chr18	13217663	13217674	KLF16	MA0741.1	LDLRAD4	ENSG00000168675
chr18	13382453	13382464	KLF16	MA0741.1	LDLRAD4	ENSG00000168675
chr18	13612539	13612550	KLF16	MA0741.1	LDLRAD4	ENSG00000168675
chr2	213152036	213152047	KLF16	MA0741.1	IKZF2	ENSG00000030419
chr22	37198800	37198811	KLF16	MA0741.1	C1QTNF6	ENSG00000133466
chr22	39145626	39145637	KLF16	MA0741.1	CBX7	ENSG00000100307
chr22	39145648	39145659	KLF16	MA0741.1	CBX7	ENSG00000100307
chr22	39152676	39152687	KLF16	MA0741.1	CBX7	ENSG00000100307
chr22	39152734	39152745	KLF16	MA0741.1	CBX7	ENSG00000100307
chr22	39152747	39152758	KLF16	MA0741.1	CBX7	ENSG00000100307
chr22	39152764	39152775	KLF16	MA0741.1	CBX7	ENSG00000100307
chr22	39152777	39152788	KLF16	MA0741.1	CBX7	ENSG00000100307
chr4	89111415	89111426	KLF16	MA0741.1	TIGD2	ENSG00000180346
chr4	89111444	89111455	KLF16	MA0741.1	TIGD2	ENSG00000180346
chr4	89111480	89111491	KLF16	MA0741.1	TIGD2	ENSG00000180346
chr4	103075966	103075977	KLF16	MA0741.1	SLC9B2	ENSG00000164038
chr5	91380315	91380326	KLF16	MA0741.1	ARRDC3	ENSG00000113369
chr5	91380470	91380481	KLF16	MA0741.1	ARRDC3	ENSG00000113369
chr5	91380503	91380514	KLF16	MA0741.1	ARRDC3	ENSG00000113369
chr5	151081037	151081048	KLF16	MA0741.1	TNIP1	ENSG00000145901
chr5	151081054	151081065	KLF16	MA0741.1	TNIP1	ENSG00000145901
chr6	446940	446951	KLF16	MA0741.1	IRF4	ENSG00000137265
chr6	446960	446971	KLF16	MA0741.1	IRF4	ENSG00000137265
chr6	41734795	41734806	KLF16	MA0741.1	TFEB	ENSG00000112561
chr6	41734812	41734823	KLF16	MA0741.1	TFEB	ENSG00000112561
chr6	41734847	41734858	KLF16	MA0741.1	TFEB	ENSG00000112561
chr6	41735645	41735656	KLF16	MA0741.1	TFEB	ENSG00000112561
chr6	137867303	137867314	KLF16	MA0741.1	TNFAIP3	ENSG00000118503
chr6	137867337	137867348	KLF16	MA0741.1	TNFAIP3	ENSG00000118503
chr6	137873448	137873459	KLF16	MA0741.1	TNFAIP3	ENSG00000118503
chr8	29350731	29350742	KLF16	MA0741.1	DUSP4	ENSG00000120875
chr8	29350797	29350808	KLF16	MA0741.1	DUSP4	ENSG00000120875
chr8	29350816	29350827	KLF16	MA0741.1	DUSP4	ENSG00000120875
chr8	29350836	29350847	KLF16	MA0741.1	DUSP4	ENSG00000120875
chr8	125430022	125430033	KLF16	MA0741.1	TRIB1	ENSG00000173334
chr9	99821919	99821930	KLF16	MA0741.1	NR4A3	ENSG00000119508
chr1	61078138	61078149	KLF2	MA1515.1	NFIA	ENSG00000162599
chr1	159923403	159923414	KLF2	MA1515.1	TAGLN2	ENSG00000158710
chr1	159923469	159923480	KLF2	MA1515.1	TAGLN2	ENSG00000158710
chr1	159923840	159923851	KLF2	MA1515.1	TAGLN2	ENSG00000158710
chr1	159924610	159924621	KLF2	MA1515.1	TAGLN2	ENSG00000158710
chr1	159925566	159925577	KLF2	MA1515.1	TAGLN2	ENSG00000158710
chr1	159925796	159925807	KLF2	MA1515.1	TAGLN2	ENSG00000158710
chr1	235642204	235642215	KLF2	MA1515.1	GNG4	ENSG00000168243
chr10	3777238	3777249	KLF2	MA1515.1	KLF6	ENSG00000067082
chr11	44565211	44565222	KLF2	MA1515.1	CD82	ENSG00000085117
chr11	44565404	44565415	KLF2	MA1515.1	CD82	ENSG00000085117
chr11	44565442	44565453	KLF2	MA1515.1	CD82	ENSG00000085117
chr11	44565502	44565513	KLF2	MA1515.1	CD82	ENSG00000085117
chr11	44565550	44565561	KLF2	MA1515.1	CD82	ENSG00000085117
chr11	44565583	44565594	KLF2	MA1515.1	CD82	ENSG00000085117
chr12	10212823	10212834	KLF2	MA1515.1	GABARAPL1	ENSG00000139112
chr12	10213263	10213274	KLF2	MA1515.1	GABARAPL1	ENSG00000139112
chr12	56007834	56007845	KLF2	MA1515.1	IKZF4	ENSG00000123411
chr12	121803008	121803019	KLF2	MA1515.1	LINC01089	ENSG00000212694
chr13	40666753	40666764	KLF2	MA1515.1	FOXO1	ENSG00000150907
chr15	60592603	60592614	KLF2	MA1515.1	RORA	ENSG00000069667
chr15	60592683	60592694	KLF2	MA1515.1	RORA	ENSG00000069667
chr18	3448703	3448714	KLF2	MA1515.1	TGIF1	ENSG00000177426
chr18	62715182	62715193	KLF2	MA1515.1	PHLPP1	ENSG00000081913
chr2	213015956	213015967	KLF2	MA1515.1	IKZF2	ENSG00000030419
chr2	213152035	213152046	KLF2	MA1515.1	IKZF2	ENSG00000030419
chr22	39145647	39145658	KLF2	MA1515.1	CBX7	ENSG00000100307
chr22	39145791	39145802	KLF2	MA1515.1	CBX7	ENSG00000100307
chr22	39152677	39152688	KLF2	MA1515.1	CBX7	ENSG00000100307
chr22	39152746	39152757	KLF2	MA1515.1	CBX7	ENSG00000100307
chr22	39152763	39152774	KLF2	MA1515.1	CBX7	ENSG00000100307
chr22	39152861	39152872	KLF2	MA1515.1	CBX7	ENSG00000100307
chr4	89111142	89111153	KLF2	MA1515.1	TIGD2	ENSG00000180346
chr4	89111414	89111425	KLF2	MA1515.1	TIGD2	ENSG00000180346
chr4	89111479	89111490	KLF2	MA1515.1	TIGD2	ENSG00000180346
chr5	91380316	91380327	KLF2	MA1515.1	ARRDC3	ENSG00000113369
chr5	91380936	91380947	KLF2	MA1515.1	ARRDC3	ENSG00000113369
chr5	91381027	91381038	KLF2	MA1515.1	ARRDC3	ENSG00000113369
chr5	91381107	91381118	KLF2	MA1515.1	ARRDC3	ENSG00000113369
chr5	151081053	151081064	KLF2	MA1515.1	TNIP1	ENSG00000145901
chr6	41734281	41734292	KLF2	MA1515.1	TFEB	ENSG00000112561
chr6	41734823	41734834	KLF2	MA1515.1	TFEB	ENSG00000112561
chr6	137873447	137873458	KLF2	MA1515.1	TNFAIP3	ENSG00000118503
chr7	30135180	30135191	KLF2	MA1515.1	MTURN	ENSG00000180354
chr8	29350762	29350773	KLF2	MA1515.1	DUSP4	ENSG00000120875
chr1	159924610	159924621	KLF3	MA1516.1	TAGLN2	ENSG00000158710
chr1	159925796	159925807	KLF3	MA1516.1	TAGLN2	ENSG00000158710
chr1	221742240	221742251	KLF3	MA1516.1	DUSP10	ENSG00000143507
chr1	221743083	221743094	KLF3	MA1516.1	DUSP10	ENSG00000143507
chr10	3777238	3777249	KLF3	MA1516.1	KLF6	ENSG00000067082
chr10	3785576	3785587	KLF3	MA1516.1	KLF6	ENSG00000067082
chr11	44565211	44565222	KLF3	MA1516.1	CD82	ENSG00000085117
chr11	44565442	44565453	KLF3	MA1516.1	CD82	ENSG00000085117
chr11	44565502	44565513	KLF3	MA1516.1	CD82	ENSG00000085117
chr11	44565550	44565561	KLF3	MA1516.1	CD82	ENSG00000085117
chr11	44565583	44565594	KLF3	MA1516.1	CD82	ENSG00000085117
chr12	10212790	10212801	KLF3	MA1516.1	GABARAPL1	ENSG00000139112
chr12	121803008	121803019	KLF3	MA1516.1	LINC01089	ENSG00000212694
chr15	60592603	60592614	KLF3	MA1516.1	RORA	ENSG00000069667
chr15	60592673	60592684	KLF3	MA1516.1	RORA	ENSG00000069667
chr2	213152035	213152046	KLF3	MA1516.1	IKZF2	ENSG00000030419
chr22	37199597	37199608	KLF3	MA1516.1	C1QTNF6	ENSG00000133466
chr22	39145647	39145658	KLF3	MA1516.1	CBX7	ENSG00000100307
chr22	39146101	39146112	KLF3	MA1516.1	CBX7	ENSG00000100307
chr4	89111142	89111153	KLF3	MA1516.1	TIGD2	ENSG00000180346
chr4	89111479	89111490	KLF3	MA1516.1	TIGD2	ENSG00000180346
chr5	91381027	91381038	KLF3	MA1516.1	ARRDC3	ENSG00000113369
chr5	91381107	91381118	KLF3	MA1516.1	ARRDC3	ENSG00000113369
chr6	41683777	41683788	KLF3	MA1516.1	TFEB	ENSG00000112561
chr6	41734823	41734834	KLF3	MA1516.1	TFEB	ENSG00000112561
chr6	41735522	41735533	KLF3	MA1516.1	TFEB	ENSG00000112561
chr6	137873447	137873458	KLF3	MA1516.1	TNFAIP3	ENSG00000118503
chr8	29350762	29350773	KLF3	MA1516.1	DUSP4	ENSG00000120875
chr1	61078137	61078149	KLF4	MA0039.4	NFIA	ENSG00000162599
chr1	89820839	89820851	KLF4	MA0039.4	LRRC8D	ENSG00000171492
chr1	89843236	89843248	KLF4	MA0039.4	LRRC8D	ENSG00000171492
chr1	159923378	159923390	KLF4	MA0039.4	TAGLN2	ENSG00000158710
chr1	159923403	159923415	KLF4	MA0039.4	TAGLN2	ENSG00000158710
chr1	159923468	159923480	KLF4	MA0039.4	TAGLN2	ENSG00000158710
chr1	159923839	159923851	KLF4	MA0039.4	TAGLN2	ENSG00000158710
chr1	159924170	159924182	KLF4	MA0039.4	TAGLN2	ENSG00000158710
chr1	159924596	159924608	KLF4	MA0039.4	TAGLN2	ENSG00000158710
chr1	159924610	159924622	KLF4	MA0039.4	TAGLN2	ENSG00000158710
chr1	159925565	159925577	KLF4	MA0039.4	TAGLN2	ENSG00000158710
chr1	235642203	235642215	KLF4	MA0039.4	GNG4	ENSG00000168243
chr10	3776087	3776099	KLF4	MA0039.4	KLF6	ENSG00000067082
chr10	3777238	3777250	KLF4	MA0039.4	KLF6	ENSG00000067082
chr10	30433972	30433984	KLF4	MA0039.4	MAP3K8	ENSG00000107968
chr11	44565205	44565217	KLF4	MA0039.4	CD82	ENSG00000085117
chr11	44565403	44565415	KLF4	MA0039.4	CD82	ENSG00000085117
chr11	44565441	44565453	KLF4	MA0039.4	CD82	ENSG00000085117
chr11	44565501	44565513	KLF4	MA0039.4	CD82	ENSG00000085117
chr11	44565549	44565561	KLF4	MA0039.4	CD82	ENSG00000085117
chr11	44565582	44565594	KLF4	MA0039.4	CD82	ENSG00000085117
chr12	10212822	10212834	KLF4	MA0039.4	GABARAPL1	ENSG00000139112
chr12	10212959	10212971	KLF4	MA0039.4	GABARAPL1	ENSG00000139112
chr12	10213262	10213274	KLF4	MA0039.4	GABARAPL1	ENSG00000139112
chr12	56007833	56007845	KLF4	MA0039.4	IKZF4	ENSG00000123411
chr13	40666752	40666764	KLF4	MA0039.4	FOXO1	ENSG00000150907
chr15	60592683	60592695	KLF4	MA0039.4	RORA	ENSG00000069667
chr18	3448702	3448714	KLF4	MA0039.4	TGIF1	ENSG00000177426
chr18	3451353	3451365	KLF4	MA0039.4	TGIF1	ENSG00000177426
chr18	13217896	13217908	KLF4	MA0039.4	LDLRAD4	ENSG00000168675
chr18	13612573	13612585	KLF4	MA0039.4	LDLRAD4	ENSG00000168675
chr18	62715177	62715189	KLF4	MA0039.4	PHLPP1	ENSG00000081913
chr2	213015955	213015967	KLF4	MA0039.4	IKZF2	ENSG00000030419
chr2	213152035	213152047	KLF4	MA0039.4	IKZF2	ENSG00000030419
chr2	213152095	213152107	KLF4	MA0039.4	IKZF2	ENSG00000030419
chr22	37198799	37198811	KLF4	MA0039.4	C1QTNF6	ENSG00000133466
chr22	37199234	37199246	KLF4	MA0039.4	C1QTNF6	ENSG00000133466
chr22	39145626	39145638	KLF4	MA0039.4	CBX7	ENSG00000100307
chr22	39145647	39145659	KLF4	MA0039.4	CBX7	ENSG00000100307
chr22	39145681	39145693	KLF4	MA0039.4	CBX7	ENSG00000100307
chr22	39145791	39145803	KLF4	MA0039.4	CBX7	ENSG00000100307
chr22	39152676	39152688	KLF4	MA0039.4	CBX7	ENSG00000100307
chr22	39152746	39152758	KLF4	MA0039.4	CBX7	ENSG00000100307
chr22	39152763	39152775	KLF4	MA0039.4	CBX7	ENSG00000100307
chr22	39152860	39152872	KLF4	MA0039.4	CBX7	ENSG00000100307
chr4	89111414	89111426	KLF4	MA0039.4	TIGD2	ENSG00000180346
chr4	89111443	89111455	KLF4	MA0039.4	TIGD2	ENSG00000180346
chr4	89111479	89111491	KLF4	MA0039.4	TIGD2	ENSG00000180346
chr5	91380315	91380327	KLF4	MA0039.4	ARRDC3	ENSG00000113369
chr5	91380470	91380482	KLF4	MA0039.4	ARRDC3	ENSG00000113369
chr5	91380502	91380514	KLF4	MA0039.4	ARRDC3	ENSG00000113369
chr5	91380935	91380947	KLF4	MA0039.4	ARRDC3	ENSG00000113369
chr5	91381017	91381029	KLF4	MA0039.4	ARRDC3	ENSG00000113369
chr5	91381106	91381118	KLF4	MA0039.4	ARRDC3	ENSG00000113369
chr5	91381856	91381868	KLF4	MA0039.4	ARRDC3	ENSG00000113369
chr5	91383659	91383671	KLF4	MA0039.4	ARRDC3	ENSG00000113369
chr5	151081053	151081065	KLF4	MA0039.4	TNIP1	ENSG00000145901
chr6	41734281	41734293	KLF4	MA0039.4	TFEB	ENSG00000112561
chr6	41735242	41735254	KLF4	MA0039.4	TFEB	ENSG00000112561
chr6	106098774	106098786	KLF4	MA0039.4	PRDM1	ENSG00000057657
chr6	137873447	137873459	KLF4	MA0039.4	TNFAIP3	ENSG00000118503
chr6	137883783	137883795	KLF4	MA0039.4	TNFAIP3	ENSG00000118503
chr6	138107494	138107506	KLF4	MA0039.4	PERP	ENSG00000112378
chr8	29350731	29350743	KLF4	MA0039.4	DUSP4	ENSG00000120875
chr8	29350762	29350774	KLF4	MA0039.4	DUSP4	ENSG00000120875
chr8	29350796	29350808	KLF4	MA0039.4	DUSP4	ENSG00000120875
chr8	29350815	29350827	KLF4	MA0039.4	DUSP4	ENSG00000120875
chr8	29350835	29350847	KLF4	MA0039.4	DUSP4	ENSG00000120875
chr8	29350858	29350870	KLF4	MA0039.4	DUSP4	ENSG00000120875
chr8	125430006	125430018	KLF4	MA0039.4	TRIB1	ENSG00000173334
chr9	99821918	99821930	KLF4	MA0039.4	NR4A3	ENSG00000119508
chr1	61078138	61078148	KLF5	MA0599.1	NFIA	ENSG00000162599
chr1	89820840	89820850	KLF5	MA0599.1	LRRC8D	ENSG00000171492
chr1	89843237	89843247	KLF5	MA0599.1	LRRC8D	ENSG00000171492
chr1	89843336	89843346	KLF5	MA0599.1	LRRC8D	ENSG00000171492
chr1	159923379	159923389	KLF5	MA0599.1	TAGLN2	ENSG00000158710
chr1	159923404	159923414	KLF5	MA0599.1	TAGLN2	ENSG00000158710
chr1	159923469	159923479	KLF5	MA0599.1	TAGLN2	ENSG00000158710
chr1	159923840	159923850	KLF5	MA0599.1	TAGLN2	ENSG00000158710
chr1	159924171	159924181	KLF5	MA0599.1	TAGLN2	ENSG00000158710
chr1	159924330	159924340	KLF5	MA0599.1	TAGLN2	ENSG00000158710
chr1	159924597	159924607	KLF5	MA0599.1	TAGLN2	ENSG00000158710
chr1	159925566	159925576	KLF5	MA0599.1	TAGLN2	ENSG00000158710
chr1	235642204	235642214	KLF5	MA0599.1	GNG4	ENSG00000168243
chr10	3776093	3776103	KLF5	MA0599.1	KLF6	ENSG00000067082
chr10	3777239	3777249	KLF5	MA0599.1	KLF6	ENSG00000067082
chr11	44565206	44565216	KLF5	MA0599.1	CD82	ENSG00000085117
chr11	44565330	44565340	KLF5	MA0599.1	CD82	ENSG00000085117
chr11	44565404	44565414	KLF5	MA0599.1	CD82	ENSG00000085117
chr11	44565442	44565452	KLF5	MA0599.1	CD82	ENSG00000085117
chr11	44565502	44565512	KLF5	MA0599.1	CD82	ENSG00000085117
chr11	44565550	44565560	KLF5	MA0599.1	CD82	ENSG00000085117
chr11	44565583	44565593	KLF5	MA0599.1	CD82	ENSG00000085117
chr11	44569173	44569183	KLF5	MA0599.1	CD82	ENSG00000085117
chr12	10212828	10212838	KLF5	MA0599.1	GABARAPL1	ENSG00000139112
chr12	10212960	10212970	KLF5	MA0599.1	GABARAPL1	ENSG00000139112
chr12	10213263	10213273	KLF5	MA0599.1	GABARAPL1	ENSG00000139112
chr12	56007834	56007844	KLF5	MA0599.1	IKZF4	ENSG00000123411
chr13	40666753	40666763	KLF5	MA0599.1	FOXO1	ENSG00000150907
chr15	60592684	60592694	KLF5	MA0599.1	RORA	ENSG00000069667
chr17	28897269	28897279	KLF5	MA0599.1	FLOT2	ENSG00000132589
chr18	3448386	3448396	KLF5	MA0599.1	TGIF1	ENSG00000177426
chr18	3448703	3448713	KLF5	MA0599.1	TGIF1	ENSG00000177426
chr18	13217897	13217907	KLF5	MA0599.1	LDLRAD4	ENSG00000168675
chr18	13612574	13612584	KLF5	MA0599.1	LDLRAD4	ENSG00000168675
chr18	62715178	62715188	KLF5	MA0599.1	PHLPP1	ENSG00000081913
chr19	38427438	38427448	KLF5	MA0599.1	RASGRP4	ENSG00000171777
chr2	213152036	213152046	KLF5	MA0599.1	IKZF2	ENSG00000030419
chr2	213152096	213152106	KLF5	MA0599.1	IKZF2	ENSG00000030419
chr22	37198800	37198810	KLF5	MA0599.1	C1QTNF6	ENSG00000133466
chr22	37199235	37199245	KLF5	MA0599.1	C1QTNF6	ENSG00000133466
chr22	37199393	37199403	KLF5	MA0599.1	C1QTNF6	ENSG00000133466
chr22	39145627	39145637	KLF5	MA0599.1	CBX7	ENSG00000100307
chr22	39145648	39145658	KLF5	MA0599.1	CBX7	ENSG00000100307
chr22	39145682	39145692	KLF5	MA0599.1	CBX7	ENSG00000100307
chr22	39145792	39145802	KLF5	MA0599.1	CBX7	ENSG00000100307
chr22	39152677	39152687	KLF5	MA0599.1	CBX7	ENSG00000100307
chr22	39152734	39152744	KLF5	MA0599.1	CBX7	ENSG00000100307
chr22	39152747	39152757	KLF5	MA0599.1	CBX7	ENSG00000100307
chr22	39152764	39152774	KLF5	MA0599.1	CBX7	ENSG00000100307
chr22	39152861	39152871	KLF5	MA0599.1	CBX7	ENSG00000100307
chr22	39152904	39152914	KLF5	MA0599.1	CBX7	ENSG00000100307
chr4	89111415	89111425	KLF5	MA0599.1	TIGD2	ENSG00000180346
chr4	89111444	89111454	KLF5	MA0599.1	TIGD2	ENSG00000180346
chr4	89111480	89111490	KLF5	MA0599.1	TIGD2	ENSG00000180346
chr5	91380316	91380326	KLF5	MA0599.1	ARRDC3	ENSG00000113369
chr5	91380471	91380481	KLF5	MA0599.1	ARRDC3	ENSG00000113369
chr5	91380503	91380513	KLF5	MA0599.1	ARRDC3	ENSG00000113369
chr5	91380936	91380946	KLF5	MA0599.1	ARRDC3	ENSG00000113369
chr5	91381107	91381117	KLF5	MA0599.1	ARRDC3	ENSG00000113369
chr5	91383660	91383670	KLF5	MA0599.1	ARRDC3	ENSG00000113369
chr5	151081054	151081064	KLF5	MA0599.1	TNIP1	ENSG00000145901
chr5	151081138	151081148	KLF5	MA0599.1	TNIP1	ENSG00000145901
chr6	41734282	41734292	KLF5	MA0599.1	TFEB	ENSG00000112561
chr6	41734823	41734833	KLF5	MA0599.1	TFEB	ENSG00000112561
chr6	41735243	41735253	KLF5	MA0599.1	TFEB	ENSG00000112561
chr6	137867304	137867314	KLF5	MA0599.1	TNFAIP3	ENSG00000118503
chr6	137873284	137873294	KLF5	MA0599.1	TNFAIP3	ENSG00000118503
chr8	29350732	29350742	KLF5	MA0599.1	DUSP4	ENSG00000120875
chr8	29350763	29350773	KLF5	MA0599.1	DUSP4	ENSG00000120875
chr8	29350797	29350807	KLF5	MA0599.1	DUSP4	ENSG00000120875
chr8	29350816	29350826	KLF5	MA0599.1	DUSP4	ENSG00000120875
chr8	29350836	29350846	KLF5	MA0599.1	DUSP4	ENSG00000120875
chr8	29350865	29350875	KLF5	MA0599.1	DUSP4	ENSG00000120875
chr8	125429534	125429544	KLF5	MA0599.1	TRIB1	ENSG00000173334
chr8	125430007	125430017	KLF5	MA0599.1	TRIB1	ENSG00000173334
chr9	99821919	99821929	KLF5	MA0599.1	NR4A3	ENSG00000119508
chr1	159924610	159924621	KLF6	MA1517.1	TAGLN2	ENSG00000158710
chr1	159925796	159925807	KLF6	MA1517.1	TAGLN2	ENSG00000158710
chr1	221742966	221742977	KLF6	MA1517.1	DUSP10	ENSG00000143507
chr1	235642204	235642215	KLF6	MA1517.1	GNG4	ENSG00000168243
chr10	3777238	3777249	KLF6	MA1517.1	KLF6	ENSG00000067082
chr10	6062546	6062557	KLF6	MA1517.1	IL2RA	ENSG00000134460
chr11	44565211	44565222	KLF6	MA1517.1	CD82	ENSG00000085117
chr11	44565442	44565453	KLF6	MA1517.1	CD82	ENSG00000085117
chr11	44565502	44565513	KLF6	MA1517.1	CD82	ENSG00000085117
chr11	44565550	44565561	KLF6	MA1517.1	CD82	ENSG00000085117
chr11	44565568	44565579	KLF6	MA1517.1	CD82	ENSG00000085117
chr11	44565583	44565594	KLF6	MA1517.1	CD82	ENSG00000085117
chr18	13377138	13377149	KLF6	MA1517.1	LDLRAD4	ENSG00000168675
chr18	13612538	13612549	KLF6	MA1517.1	LDLRAD4	ENSG00000168675
chr2	213015956	213015967	KLF6	MA1517.1	IKZF2	ENSG00000030419
chr2	213147743	213147754	KLF6	MA1517.1	IKZF2	ENSG00000030419
chr2	213152035	213152046	KLF6	MA1517.1	IKZF2	ENSG00000030419
chr22	39145647	39145658	KLF6	MA1517.1	CBX7	ENSG00000100307
chr4	89111142	89111153	KLF6	MA1517.1	TIGD2	ENSG00000180346
chr4	89111479	89111490	KLF6	MA1517.1	TIGD2	ENSG00000180346
chr4	103075965	103075976	KLF6	MA1517.1	SLC9B2	ENSG00000164038
chr5	91381107	91381118	KLF6	MA1517.1	ARRDC3	ENSG00000113369
chr6	41734823	41734834	KLF6	MA1517.1	TFEB	ENSG00000112561
chr6	137873447	137873458	KLF6	MA1517.1	TNFAIP3	ENSG00000118503
chr7	30135180	30135191	KLF6	MA1517.1	MTURN	ENSG00000180354
chr8	29350762	29350773	KLF6	MA1517.1	DUSP4	ENSG00000120875
chr8	125430023	125430034	KLF6	MA1517.1	TRIB1	ENSG00000173334
chr1	61078134	61078150	KLF9	MA1107.2	NFIA	ENSG00000162599
chr1	159923402	159923418	KLF9	MA1107.2	TAGLN2	ENSG00000158710
chr1	159923836	159923852	KLF9	MA1107.2	TAGLN2	ENSG00000158710
chr1	159924597	159924613	KLF9	MA1107.2	TAGLN2	ENSG00000158710
chr1	159925792	159925808	KLF9	MA1107.2	TAGLN2	ENSG00000158710
chr10	3777237	3777253	KLF9	MA1107.2	KLF6	ENSG00000067082
chr10	3805420	3805436	KLF9	MA1107.2	KLF6	ENSG00000067082
chr11	44565207	44565223	KLF9	MA1107.2	CD82	ENSG00000085117
chr11	44565400	44565416	KLF9	MA1107.2	CD82	ENSG00000085117
chr11	44565498	44565514	KLF9	MA1107.2	CD82	ENSG00000085117
chr11	44565564	44565580	KLF9	MA1107.2	CD82	ENSG00000085117
chr11	46380514	46380530	KLF9	MA1107.2	MDK	ENSG00000110492
chr12	10212819	10212835	KLF9	MA1107.2	GABARAPL1	ENSG00000139112
chr12	121802026	121802042	KLF9	MA1107.2	LINC01089	ENSG00000212694
chr13	40666749	40666765	KLF9	MA1107.2	FOXO1	ENSG00000150907
chr18	13612241	13612257	KLF9	MA1107.2	LDLRAD4	ENSG00000168675
chr18	13612537	13612553	KLF9	MA1107.2	LDLRAD4	ENSG00000168675
chr18	62715453	62715469	KLF9	MA1107.2	PHLPP1	ENSG00000081913
chr2	213015952	213015968	KLF9	MA1107.2	IKZF2	ENSG00000030419
chr2	213015975	213015991	KLF9	MA1107.2	IKZF2	ENSG00000030419
chr22	37198798	37198814	KLF9	MA1107.2	C1QTNF6	ENSG00000133466
chr22	39145646	39145662	KLF9	MA1107.2	CBX7	ENSG00000100307
chr22	39152673	39152689	KLF9	MA1107.2	CBX7	ENSG00000100307
chr22	39152745	39152761	KLF9	MA1107.2	CBX7	ENSG00000100307
chr4	89111478	89111494	KLF9	MA1107.2	TIGD2	ENSG00000180346
chr4	103075964	103075980	KLF9	MA1107.2	SLC9B2	ENSG00000164038
chr5	91380932	91380948	KLF9	MA1107.2	ARRDC3	ENSG00000113369
chr6	400065	400081	KLF9	MA1107.2	IRF4	ENSG00000137265
chr6	41734845	41734861	KLF9	MA1107.2	TFEB	ENSG00000112561
chr6	41735241	41735257	KLF9	MA1107.2	TFEB	ENSG00000112561
chr6	41735601	41735617	KLF9	MA1107.2	TFEB	ENSG00000112561
chr6	137867335	137867351	KLF9	MA1107.2	TNFAIP3	ENSG00000118503
chr6	137873446	137873462	KLF9	MA1107.2	TNFAIP3	ENSG00000118503
chr8	29350859	29350875	KLF9	MA1107.2	DUSP4	ENSG00000120875
chr8	125429563	125429579	KLF9	MA1107.2	TRIB1	ENSG00000173334
chr8	125430019	125430035	KLF9	MA1107.2	TRIB1	ENSG00000173334
chr8	125430261	125430277	KLF9	MA1107.2	TRIB1	ENSG00000173334
chrX	55452097	55452113	KLF9	MA1107.2	MAGEH1	ENSG00000187601
chr1	89843313	89843328	LEF1	MA0768.1	LRRC8D	ENSG00000171492
chr1	89843589	89843604	LEF1	MA0768.1	LRRC8D	ENSG00000171492
chr1	89855877	89855892	LEF1	MA0768.1	LRRC8D	ENSG00000171492
chr1	89871184	89871199	LEF1	MA0768.1	LRRC8D	ENSG00000171492
chr1	159925372	159925387	LEF1	MA0768.1	TAGLN2	ENSG00000158710
chr1	221726513	221726528	LEF1	MA0768.1	DUSP10	ENSG00000143507
chr1	221742552	221742567	LEF1	MA0768.1	DUSP10	ENSG00000143507
chr1	235642472	235642487	LEF1	MA0768.1	GNG4	ENSG00000168243
chr10	3777175	3777190	LEF1	MA0768.1	KLF6	ENSG00000067082
chr12	10212714	10212729	LEF1	MA0768.1	GABARAPL1	ENSG00000139112
chr12	121803272	121803287	LEF1	MA0768.1	LINC01089	ENSG00000212694
chr15	60580770	60580785	LEF1	MA0768.1	RORA	ENSG00000069667
chr15	60580809	60580824	LEF1	MA0768.1	RORA	ENSG00000069667
chr18	13216506	13216521	LEF1	MA0768.1	LDLRAD4	ENSG00000168675
chr18	13375616	13375631	LEF1	MA0768.1	LDLRAD4	ENSG00000168675
chr18	62869757	62869772	LEF1	MA0768.1	PHLPP1	ENSG00000081913
chr2	213119687	213119702	LEF1	MA0768.1	IKZF2	ENSG00000030419
chr3	16462805	16462820	LEF1	MA0768.1	RFTN1	ENSG00000131378
chr10	18204233	18204248	MAF	MA1520.1	CACNB2	ENSG00000165995
chr18	13216279	13216294	MAF	MA1520.1	LDLRAD4	ENSG00000168675
chr22	37186702	37186717	MAF	MA1520.1	C1QTNF6	ENSG00000133466
chr1	89866022	89866038	MAFF	MA0495.3	LRRC8D	ENSG00000171492
chr1	89871171	89871187	MAFF	MA0495.3	LRRC8D	ENSG00000171492
chr10	3776003	3776019	MAFF	MA0495.3	KLF6	ENSG00000067082
chr10	3783074	3783090	MAFF	MA0495.3	KLF6	ENSG00000067082
chr10	6052686	6052702	MAFF	MA0495.3	IL2RA	ENSG00000134460
chr11	44569365	44569381	MAFF	MA0495.3	CD82	ENSG00000085117
chr12	121802132	121802148	MAFF	MA0495.3	LINC01089	ENSG00000212694
chr18	13375588	13375604	MAFF	MA0495.3	LDLRAD4	ENSG00000168675
chr19	38427503	38427519	MAFF	MA0495.3	RASGRP4	ENSG00000171777
chr19	38427572	38427588	MAFF	MA0495.3	RASGRP4	ENSG00000171777
chr2	213147689	213147705	MAFF	MA0495.3	IKZF2	ENSG00000030419
chr5	91381823	91381839	MAFF	MA0495.3	ARRDC3	ENSG00000113369
chr6	445046	445062	MAFF	MA0495.3	IRF4	ENSG00000137265
chr6	41732876	41732892	MAFF	MA0495.3	TFEB	ENSG00000112561
chr6	106098914	106098930	MAFF	MA0495.3	PRDM1	ENSG00000057657
chr1	89866023	89866038	MAFG	MA0659.2	LRRC8D	ENSG00000171492
chr1	89871172	89871187	MAFG	MA0659.2	LRRC8D	ENSG00000171492
chr10	3776003	3776018	MAFG	MA0659.2	KLF6	ENSG00000067082
chr10	6052687	6052702	MAFG	MA0659.2	IL2RA	ENSG00000134460
chr12	121802133	121802148	MAFG	MA0659.2	LINC01089	ENSG00000212694
chr18	3448563	3448578	MAFG	MA0659.2	TGIF1	ENSG00000177426
chr18	13375589	13375604	MAFG	MA0659.2	LDLRAD4	ENSG00000168675
chr2	213147690	213147705	MAFG	MA0659.2	IKZF2	ENSG00000030419
chr6	41732877	41732892	MAFG	MA0659.2	TFEB	ENSG00000112561
chr6	106098914	106098929	MAFG	MA0659.2	PRDM1	ENSG00000057657
chrX	55452125	55452140	MAFG	MA0659.2	MAGEH1	ENSG00000187601
chr1	159924632	159924647	MAFK	MA0496.3	TAGLN2	ENSG00000158710
chr1	221712317	221712332	MAFK	MA0496.3	DUSP10	ENSG00000143507
chr1	235642533	235642548	MAFK	MA0496.3	GNG4	ENSG00000168243
chr10	3776104	3776119	MAFK	MA0496.3	KLF6	ENSG00000067082
chr10	3783070	3783085	MAFK	MA0496.3	KLF6	ENSG00000067082
chr11	44569324	44569339	MAFK	MA0496.3	CD82	ENSG00000085117
chr11	46380521	46380536	MAFK	MA0496.3	MDK	ENSG00000110492
chr12	10212362	10212377	MAFK	MA0496.3	GABARAPL1	ENSG00000139112
chr12	10213470	10213485	MAFK	MA0496.3	GABARAPL1	ENSG00000139112
chr18	3448424	3448439	MAFK	MA0496.3	TGIF1	ENSG00000177426
chr18	13375410	13375425	MAFK	MA0496.3	LDLRAD4	ENSG00000168675
chr18	13375519	13375534	MAFK	MA0496.3	LDLRAD4	ENSG00000168675
chr18	13375541	13375556	MAFK	MA0496.3	LDLRAD4	ENSG00000168675
chr2	213119648	213119663	MAFK	MA0496.3	IKZF2	ENSG00000030419
chr5	151078961	151078976	MAFK	MA0496.3	TNIP1	ENSG00000145901
chr6	403921	403936	MAFK	MA0496.3	IRF4	ENSG00000137265
chr6	404478	404493	MAFK	MA0496.3	IRF4	ENSG00000137265
chr6	446970	446985	MAFK	MA0496.3	IRF4	ENSG00000137265
chr6	41734868	41734883	MAFK	MA0496.3	TFEB	ENSG00000112561
chr6	137866298	137866313	MAFK	MA0496.3	TNFAIP3	ENSG00000118503
chr8	125434803	125434818	MAFK	MA0496.3	TRIB1	ENSG00000173334
chr12	92065198	92065208	MAX	MA0058.3	LINC01619	ENSG00000257242
chr22	39145776	39145786	MAX	MA0058.3	CBX7	ENSG00000100307
chr1	61077094	61077105	MAZ	MA1522.1	NFIA	ENSG00000162599
chr1	89820839	89820850	MAZ	MA1522.1	LRRC8D	ENSG00000171492
chr1	89843336	89843347	MAZ	MA1522.1	LRRC8D	ENSG00000171492
chr1	159923379	159923390	MAZ	MA1522.1	TAGLN2	ENSG00000158710
chr1	159923779	159923790	MAZ	MA1522.1	TAGLN2	ENSG00000158710
chr1	159924330	159924341	MAZ	MA1522.1	TAGLN2	ENSG00000158710
chr1	159924544	159924555	MAZ	MA1522.1	TAGLN2	ENSG00000158710
chr10	3776092	3776103	MAZ	MA1522.1	KLF6	ENSG00000067082
chr10	3785802	3785813	MAZ	MA1522.1	KLF6	ENSG00000067082
chr10	3785829	3785840	MAZ	MA1522.1	KLF6	ENSG00000067082
chr10	3785903	3785914	MAZ	MA1522.1	KLF6	ENSG00000067082
chr11	44565206	44565217	MAZ	MA1522.1	CD82	ENSG00000085117
chr11	44565562	44565573	MAZ	MA1522.1	CD82	ENSG00000085117
chr11	44565625	44565636	MAZ	MA1522.1	CD82	ENSG00000085117
chr11	44569142	44569153	MAZ	MA1522.1	CD82	ENSG00000085117
chr11	44569173	44569184	MAZ	MA1522.1	CD82	ENSG00000085117
chr11	46380438	46380449	MAZ	MA1522.1	MDK	ENSG00000110492
chr12	10212452	10212463	MAZ	MA1522.1	GABARAPL1	ENSG00000139112
chr12	56007818	56007829	MAZ	MA1522.1	IKZF4	ENSG00000123411
chr13	40665077	40665088	MAZ	MA1522.1	FOXO1	ENSG00000150907
chr13	40666775	40666786	MAZ	MA1522.1	FOXO1	ENSG00000150907
chr15	60592608	60592619	MAZ	MA1522.1	RORA	ENSG00000069667
chr17	28897269	28897280	MAZ	MA1522.1	FLOT2	ENSG00000132589
chr17	28897312	28897323	MAZ	MA1522.1	FLOT2	ENSG00000132589
chr18	3448385	3448396	MAZ	MA1522.1	TGIF1	ENSG00000177426
chr18	3449061	3449072	MAZ	MA1522.1	TGIF1	ENSG00000177426
chr18	3451340	3451351	MAZ	MA1522.1	TGIF1	ENSG00000177426
chr18	3451537	3451548	MAZ	MA1522.1	TGIF1	ENSG00000177426
chr18	13217669	13217680	MAZ	MA1522.1	LDLRAD4	ENSG00000168675
chr18	13612550	13612561	MAZ	MA1522.1	LDLRAD4	ENSG00000168675
chr19	38427437	38427448	MAZ	MA1522.1	RASGRP4	ENSG00000171777
chr2	213152095	213152106	MAZ	MA1522.1	IKZF2	ENSG00000030419
chr22	37198677	37198688	MAZ	MA1522.1	C1QTNF6	ENSG00000133466
chr22	37199234	37199245	MAZ	MA1522.1	C1QTNF6	ENSG00000133466
chr22	39145627	39145638	MAZ	MA1522.1	CBX7	ENSG00000100307
chr22	39145682	39145693	MAZ	MA1522.1	CBX7	ENSG00000100307
chr22	39152321	39152332	MAZ	MA1522.1	CBX7	ENSG00000100307
chr22	39152671	39152682	MAZ	MA1522.1	CBX7	ENSG00000100307
chr4	89111419	89111430	MAZ	MA1522.1	TIGD2	ENSG00000180346
chr4	89111443	89111454	MAZ	MA1522.1	TIGD2	ENSG00000180346
chr5	91380435	91380446	MAZ	MA1522.1	ARRDC3	ENSG00000113369
chr5	91380471	91380482	MAZ	MA1522.1	ARRDC3	ENSG00000113369
chr5	91380502	91380513	MAZ	MA1522.1	ARRDC3	ENSG00000113369
chr5	91381848	91381859	MAZ	MA1522.1	ARRDC3	ENSG00000113369
chr5	151080843	151080854	MAZ	MA1522.1	TNIP1	ENSG00000145901
chr5	151087201	151087212	MAZ	MA1522.1	TNIP1	ENSG00000145901
chr6	41735056	41735067	MAZ	MA1522.1	TFEB	ENSG00000112561
chr6	137867550	137867561	MAZ	MA1522.1	TNFAIP3	ENSG00000118503
chr6	137870950	137870961	MAZ	MA1522.1	TNFAIP3	ENSG00000118503
chr6	137873284	137873295	MAZ	MA1522.1	TNFAIP3	ENSG00000118503
chr6	138107461	138107472	MAZ	MA1522.1	PERP	ENSG00000112378
chr8	29350514	29350525	MAZ	MA1522.1	DUSP4	ENSG00000120875
chr8	29350732	29350743	MAZ	MA1522.1	DUSP4	ENSG00000120875
chr8	29350851	29350862	MAZ	MA1522.1	DUSP4	ENSG00000120875
chr8	29350864	29350875	MAZ	MA1522.1	DUSP4	ENSG00000120875
chr8	29351000	29351011	MAZ	MA1522.1	DUSP4	ENSG00000120875
chr8	125429534	125429545	MAZ	MA1522.1	TRIB1	ENSG00000173334
chr8	125429649	125429660	MAZ	MA1522.1	TRIB1	ENSG00000173334
chr8	125429939	125429950	MAZ	MA1522.1	TRIB1	ENSG00000173334
chr8	125430006	125430017	MAZ	MA1522.1	TRIB1	ENSG00000173334
chr9	99821923	99821934	MAZ	MA1522.1	NR4A3	ENSG00000119508
chr1	89855833	89855848	MEF2A	MA0052.4	LRRC8D	ENSG00000171492
chr1	89866013	89866028	MEF2A	MA0052.4	LRRC8D	ENSG00000171492
chr1	221713360	221713375	MEF2A	MA0052.4	DUSP10	ENSG00000143507
chr1	221726528	221726543	MEF2A	MA0052.4	DUSP10	ENSG00000143507
chr10	3775821	3775836	MEF2A	MA0052.4	KLF6	ENSG00000067082
chr10	3777125	3777140	MEF2A	MA0052.4	KLF6	ENSG00000067082
chr10	3785505	3785520	MEF2A	MA0052.4	KLF6	ENSG00000067082
chr12	121802088	121802103	MEF2A	MA0052.4	LINC01089	ENSG00000212694
chr13	40666841	40666856	MEF2A	MA0052.4	FOXO1	ENSG00000150907
chr18	3448962	3448977	MEF2A	MA0052.4	TGIF1	ENSG00000177426
chr18	3451322	3451337	MEF2A	MA0052.4	TGIF1	ENSG00000177426
chr18	13375303	13375318	MEF2A	MA0052.4	LDLRAD4	ENSG00000168675
chr18	13382585	13382600	MEF2A	MA0052.4	LDLRAD4	ENSG00000168675
chr22	39152615	39152630	MEF2A	MA0052.4	CBX7	ENSG00000100307
chr6	399907	399922	MEF2A	MA0052.4	IRF4	ENSG00000137265
chr6	399985	400000	MEF2A	MA0052.4	IRF4	ENSG00000137265
chr6	106098045	106098060	MEF2A	MA0052.4	PRDM1	ENSG00000057657
chr6	137866394	137866409	MEF2A	MA0052.4	TNFAIP3	ENSG00000118503
chr6	137882689	137882704	MEF2A	MA0052.4	TNFAIP3	ENSG00000118503
chr7	30134788	30134803	MEF2A	MA0052.4	MTURN	ENSG00000180354
chr1	61453234	61453246	MEF2D	MA0773.1	NFIA	ENSG00000162599
chr1	89855834	89855846	MEF2D	MA0773.1	LRRC8D	ENSG00000171492
chr1	192575741	192575753	MEF2D	MA0773.1	RGS1	ENSG00000090104
chr1	221713362	221713374	MEF2D	MA0773.1	DUSP10	ENSG00000143507
chr10	3785507	3785519	MEF2D	MA0773.1	KLF6	ENSG00000067082
chr18	13375305	13375317	MEF2D	MA0773.1	LDLRAD4	ENSG00000168675
chr18	13382586	13382598	MEF2D	MA0773.1	LDLRAD4	ENSG00000168675
chr2	213151337	213151349	MEF2D	MA0773.1	IKZF2	ENSG00000030419
chr6	399909	399921	MEF2D	MA0773.1	IRF4	ENSG00000137265
chr6	399987	399999	MEF2D	MA0773.1	IRF4	ENSG00000137265
chr7	30134789	30134801	MEF2D	MA0773.1	MTURN	ENSG00000180354
chr10	3782348	3782358	MEOX1	MA0661.1	KLF6	ENSG00000067082
chr11	46380519	46380527	MGA	MA0801.1	MDK	ENSG00000110492
chr12	121801821	121801829	MGA	MA0801.1	LINC01089	ENSG00000212694
chr18	13377140	13377148	MGA	MA0801.1	LDLRAD4	ENSG00000168675
chr18	13612261	13612269	MGA	MA0801.1	LDLRAD4	ENSG00000168675
chr19	38427469	38427477	MGA	MA0801.1	RASGRP4	ENSG00000171777
chr6	389769	389777	MGA	MA0801.1	IRF4	ENSG00000137265
chr6	137867338	137867346	MGA	MA0801.1	TNFAIP3	ENSG00000118503
chr9	99822051	99822059	MGA	MA0801.1	NR4A3	ENSG00000119508
chr1	221712433	221712443	MLX	MA0663.1	DUSP10	ENSG00000143507
chr12	92065198	92065208	MLX	MA0663.1	LINC01619	ENSG00000257242
chr22	39145776	39145786	MLX	MA0663.1	CBX7	ENSG00000100307
chr6	137866747	137866757	MLX	MA0663.1	TNFAIP3	ENSG00000118503
chr6	137867178	137867188	MLX	MA0663.1	TNFAIP3	ENSG00000118503
chr12	92065198	92065208	MNT	MA0825.1	LINC01619	ENSG00000257242
chr22	39145776	39145786	MNT	MA0825.1	CBX7	ENSG00000100307
chr6	137866747	137866757	MNT	MA0825.1	TNFAIP3	ENSG00000118503
chr1	221709192	221709202	MSANTD3	MA1523.1	DUSP10	ENSG00000143507
chr11	44565354	44565364	MSANTD3	MA1523.1	CD82	ENSG00000085117
chr11	44569203	44569213	MSANTD3	MA1523.1	CD82	ENSG00000085117
chr13	40666825	40666835	MSANTD3	MA1523.1	FOXO1	ENSG00000150907
chr17	28897455	28897465	MSANTD3	MA1523.1	FLOT2	ENSG00000132589
chr18	13382420	13382430	MSANTD3	MA1523.1	LDLRAD4	ENSG00000168675
chr19	38427570	38427580	MSANTD3	MA1523.1	RASGRP4	ENSG00000171777
chr2	213145965	213145975	MSANTD3	MA1523.1	IKZF2	ENSG00000030419
chr4	89111371	89111381	MSANTD3	MA1523.1	TIGD2	ENSG00000180346
chr6	137866553	137866563	MSANTD3	MA1523.1	TNFAIP3	ENSG00000118503
chr8	125430260	125430270	MSANTD3	MA1523.1	TRIB1	ENSG00000173334
chr8	125430355	125430365	MSANTD3	MA1523.1	TRIB1	ENSG00000173334
chr1	235642438	235642452	MTF1	MA0863.1	GNG4	ENSG00000168243
chr18	3448461	3448475	MTF1	MA0863.1	TGIF1	ENSG00000177426
chr18	62715195	62715209	MTF1	MA0863.1	PHLPP1	ENSG00000081913
chr22	39153028	39153042	MTF1	MA0863.1	CBX7	ENSG00000100307
chr5	72956035	72956049	MTF1	MA0863.1	FCHO2	ENSG00000157107
chr5	91383665	91383679	MTF1	MA0863.1	ARRDC3	ENSG00000113369
chr6	404914	404928	MTF1	MA0863.1	IRF4	ENSG00000137265
chr8	125429773	125429787	MTF1	MA0863.1	TRIB1	ENSG00000173334
chr1	159925410	159925420	MXI1	MA1108.2	TAGLN2	ENSG00000158710
chr1	192575515	192575525	MXI1	MA1108.2	RGS1	ENSG00000090104
chr1	221709021	221709031	MXI1	MA1108.2	DUSP10	ENSG00000143507
chr10	3777208	3777218	MXI1	MA1108.2	KLF6	ENSG00000067082
chr10	3782613	3782623	MXI1	MA1108.2	KLF6	ENSG00000067082
chr10	3805284	3805294	MXI1	MA1108.2	KLF6	ENSG00000067082
chr12	121803332	121803342	MXI1	MA1108.2	LINC01089	ENSG00000212694
chr19	38427540	38427550	MXI1	MA1108.2	RASGRP4	ENSG00000171777
chr5	141974136	141974146	MXI1	MA1108.2	PCDH12	ENSG00000113555
chr6	106097950	106097960	MXI1	MA1108.2	PRDM1	ENSG00000057657
chr6	137866930	137866940	MXI1	MA1108.2	TNFAIP3	ENSG00000118503
chr8	125434888	125434898	MXI1	MA1108.2	TRIB1	ENSG00000173334
chr1	159924290	159924300	MYB	MA0100.3	TAGLN2	ENSG00000158710
chr1	159924480	159924490	MYB	MA0100.3	TAGLN2	ENSG00000158710
chr1	235642513	235642523	MYB	MA0100.3	GNG4	ENSG00000168243
chr10	3783063	3783073	MYB	MA0100.3	KLF6	ENSG00000067082
chr10	3785837	3785847	MYB	MA0100.3	KLF6	ENSG00000067082
chr10	3785874	3785884	MYB	MA0100.3	KLF6	ENSG00000067082
chr10	3785911	3785921	MYB	MA0100.3	KLF6	ENSG00000067082
chr12	92030825	92030835	MYB	MA0100.3	LINC01619	ENSG00000257242
chr18	3448470	3448480	MYB	MA0100.3	TGIF1	ENSG00000177426
chr6	404012	404022	MYB	MA0100.3	IRF4	ENSG00000137265
chr6	137867229	137867239	MYB	MA0100.3	TNFAIP3	ENSG00000118503
chr6	138109566	138109576	MYB	MA0100.3	PERP	ENSG00000112378
chr7	135147904	135147914	MYB	MA0100.3	TMEM140	ENSG00000146859
chr8	125430235	125430245	MYB	MA0100.3	TRIB1	ENSG00000173334
chr1	221742410	221742422	MYBL1	MA0776.1	DUSP10	ENSG00000143507
chr18	3448084	3448099	MYBL2	MA0777.1	TGIF1	ENSG00000177426
chr5	141973985	141974000	MYBL2	MA0777.1	PCDH12	ENSG00000113555
chr12	92065197	92065209	MYC	MA0147.3	LINC01619	ENSG00000257242
chr22	39145775	39145787	MYC	MA0147.3	CBX7	ENSG00000100307
chr4	89111149	89111161	MYC	MA0147.3	TIGD2	ENSG00000180346
chr1	159923980	159923993	MZF1	MA0056.2	TAGLN2	ENSG00000158710
chr1	159924069	159924082	MZF1	MA0056.2	TAGLN2	ENSG00000158710
chr1	159924439	159924452	MZF1	MA0056.2	TAGLN2	ENSG00000158710
chr1	159925521	159925534	MZF1	MA0056.2	TAGLN2	ENSG00000158710
chr1	221743111	221743124	MZF1	MA0056.2	DUSP10	ENSG00000143507
chr10	6051290	6051303	MZF1	MA0056.2	IL2RA	ENSG00000134460
chr11	44565384	44565397	MZF1	MA0056.2	CD82	ENSG00000085117
chr12	92065294	92065307	MZF1	MA0056.2	LINC01619	ENSG00000257242
chr18	62715541	62715554	MZF1	MA0056.2	PHLPP1	ENSG00000081913
chr22	39146036	39146049	MZF1	MA0056.2	CBX7	ENSG00000100307
chr5	91383661	91383674	MZF1	MA0056.2	ARRDC3	ENSG00000113369
chr5	151083503	151083516	MZF1	MA0056.2	TNIP1	ENSG00000145901
chr6	137883780	137883793	MZF1	MA0056.2	TNFAIP3	ENSG00000118503
chr8	125429518	125429531	MZF1	MA0056.2	TRIB1	ENSG00000173334
chr1	192580683	192580690	NFATC2	MA0152.1	RGS1	ENSG00000090104
chr1	221742531	221742538	NFATC2	MA0152.1	DUSP10	ENSG00000143507
chr1	235649107	235649114	NFATC2	MA0152.1	GNG4	ENSG00000168243
chr10	30434068	30434075	NFATC2	MA0152.1	MAP3K8	ENSG00000107968
chr11	44569360	44569367	NFATC2	MA0152.1	CD82	ENSG00000085117
chr12	121801960	121801967	NFATC2	MA0152.1	LINC01089	ENSG00000212694
chr12	121802865	121802872	NFATC2	MA0152.1	LINC01089	ENSG00000212694
chr12	121803268	121803275	NFATC2	MA0152.1	LINC01089	ENSG00000212694
chr13	40666767	40666774	NFATC2	MA0152.1	FOXO1	ENSG00000150907
chr17	28897298	28897305	NFATC2	MA0152.1	FLOT2	ENSG00000132589
chr18	3448656	3448663	NFATC2	MA0152.1	TGIF1	ENSG00000177426
chr18	13375291	13375298	NFATC2	MA0152.1	LDLRAD4	ENSG00000168675
chr18	13382463	13382470	NFATC2	MA0152.1	LDLRAD4	ENSG00000168675
chr22	39152640	39152647	NFATC2	MA0152.1	CBX7	ENSG00000100307
chr5	141960804	141960811	NFATC2	MA0152.1	PCDH12	ENSG00000113555
chr7	30134819	30134826	NFATC2	MA0152.1	MTURN	ENSG00000180354
chr8	125429545	125429552	NFATC2	MA0152.1	TRIB1	ENSG00000173334
chr8	125429930	125429937	NFATC2	MA0152.1	TRIB1	ENSG00000173334
chrX	55452037	55452044	NFATC2	MA0152.1	MAGEH1	ENSG00000187601
chr10	3785487	3785497	NFATC3	MA0625.1	KLF6	ENSG00000067082
chr10	30434066	30434076	NFATC3	MA0625.1	MAP3K8	ENSG00000107968
chr12	121802863	121802873	NFATC3	MA0625.1	LINC01089	ENSG00000212694
chr18	3448654	3448664	NFATC3	MA0625.1	TGIF1	ENSG00000177426
chr18	3448835	3448845	NFATC3	MA0625.1	TGIF1	ENSG00000177426
chr18	13382462	13382472	NFATC3	MA0625.1	LDLRAD4	ENSG00000168675
chr3	16462882	16462892	NFATC3	MA0625.1	RFTN1	ENSG00000131378
chr5	91385009	91385019	NFATC3	MA0625.1	ARRDC3	ENSG00000113369
chr5	141960802	141960812	NFATC3	MA0625.1	PCDH12	ENSG00000113555
chr6	446893	446903	NFATC3	MA0625.1	IRF4	ENSG00000137265
chr6	446996	447006	NFATC3	MA0625.1	IRF4	ENSG00000137265
chr8	125434816	125434826	NFATC3	MA0625.1	TRIB1	ENSG00000173334
chr1	221712319	221712330	NFE2L2	MA0150.1	DUSP10	ENSG00000143507
chr11	44565642	44565653	NFE2L2	MA0150.1	CD82	ENSG00000085117
chr11	46380523	46380534	NFE2L2	MA0150.1	MDK	ENSG00000110492
chr12	10212364	10212375	NFE2L2	MA0150.1	GABARAPL1	ENSG00000139112
chr12	10213472	10213483	NFE2L2	MA0150.1	GABARAPL1	ENSG00000139112
chr12	92065391	92065402	NFE2L2	MA0150.1	LINC01619	ENSG00000257242
chr18	13375521	13375532	NFE2L2	MA0150.1	LDLRAD4	ENSG00000168675
chr18	13612381	13612392	NFE2L2	MA0150.1	LDLRAD4	ENSG00000168675
chr22	39146070	39146081	NFE2L2	MA0150.1	CBX7	ENSG00000100307
chr6	404480	404491	NFE2L2	MA0150.1	IRF4	ENSG00000137265
chr6	41733038	41733049	NFE2L2	MA0150.1	TFEB	ENSG00000112561
chr6	137873545	137873556	NFE2L2	MA0150.1	TNFAIP3	ENSG00000118503
chr1	221709171	221709181	NFIA	MA0670.1	DUSP10	ENSG00000143507
chr1	221742778	221742788	NFIA	MA0670.1	DUSP10	ENSG00000143507
chr15	60586273	60586283	NFIA	MA0670.1	RORA	ENSG00000069667
chr6	403846	403856	NFIA	MA0670.1	IRF4	ENSG00000137265
chr1	159923496	159923507	NFIC	MA0161.2	TAGLN2	ENSG00000158710
chr1	221742777	221742788	NFIC	MA0161.2	DUSP10	ENSG00000143507
chr15	60586273	60586284	NFIC	MA0161.2	RORA	ENSG00000069667
chr22	37186462	37186473	NFIC	MA0161.2	C1QTNF6	ENSG00000133466
chr5	91383676	91383687	NFIC	MA0161.2	ARRDC3	ENSG00000113369
chr6	137873704	137873715	NFIC	MA0161.2	TNFAIP3	ENSG00000118503
chr1	61453283	61453296	NFIL3	MA0025.2	NFIA	ENSG00000162599
chr1	89843150	89843163	NFIL3	MA0025.2	LRRC8D	ENSG00000171492
chr1	89871092	89871105	NFIL3	MA0025.2	LRRC8D	ENSG00000171492
chr1	221709261	221709274	NFIL3	MA0025.2	DUSP10	ENSG00000143507
chr12	10213333	10213346	NFIL3	MA0025.2	GABARAPL1	ENSG00000139112
chr6	446783	446796	NFIL3	MA0025.2	IRF4	ENSG00000137265
chr6	41733065	41733078	NFIL3	MA0025.2	TFEB	ENSG00000112561
chr6	41735069	41735082	NFIL3	MA0025.2	TFEB	ENSG00000112561
chr8	125430216	125430229	NFIL3	MA0025.2	TRIB1	ENSG00000173334
chr8	125434714	125434727	NFIL3	MA0025.2	TRIB1	ENSG00000173334
chr8	125434842	125434855	NFIL3	MA0025.2	TRIB1	ENSG00000173334
chr15	60586273	60586282	NFIX	MA0671.1	RORA	ENSG00000069667
chr22	37186462	37186471	NFIX	MA0671.1	C1QTNF6	ENSG00000133466
chr6	403846	403855	NFIX	MA0671.1	IRF4	ENSG00000137265
chr8	125434700	125434709	NFIX	MA0671.1	TRIB1	ENSG00000173334
[truncated: 4,031 more rows]

## Sheet: TFBS at Other DEGs
TFBS_chr	TFBS_start	TFBS_end	TF_hgnc_symbol	jaspar_motif_id	target_hgnc_symbol	ensembl_gene_id
chr1	26787665	26787680	AR	MA0007.2	PIGV	ENSG00000060642
chr1	40315526	40315541	AR	MA0007.2	COL9A2	ENSG00000049089
chr1	67333336	67333351	AR	MA0007.2	IL12RB2	ENSG00000081985
chr1	109113791	109113806	AR	MA0007.2	KIAA1324	ENSG00000116299
chr1	151839985	151840000	AR	MA0007.2	C2CD4D	ENSG00000225556
chr1	205285118	205285133	AR	MA0007.2	TMCC2	ENSG00000133069
chr11	95231451	95231466	AR	MA0007.2	SESN3	ENSG00000149212
chr12	6779082	6779097	AR	MA0007.2	LAG3	ENSG00000089692
chr12	47904972	47904987	AR	MA0007.2	VDR	ENSG00000111424
chr12	57225597	57225612	AR	MA0007.2	SHMT2	ENSG00000182199
chr14	35403935	35403950	AR	MA0007.2	NFKBIA	ENSG00000100906
chr14	35404035	35404050	AR	MA0007.2	NFKBIA	ENSG00000100906
chr14	55354780	55354795	AR	MA0007.2	FBXO34	ENSG00000178974
chr16	68448712	68448727	AR	MA0007.2	SMPD3	ENSG00000103056
chr16	88456986	88457001	AR	MA0007.2	ZFPM1	ENSG00000179588
chr17	45317726	45317741	AR	MA0007.2	MAP3K14	ENSG00000006062
chr18	45686880	45686895	AR	MA0007.2	SLC14A1	ENSG00000141469
chr19	2475592	2475607	AR	MA0007.2	GADD45B	ENSG00000099860
chr2	24919338	24919353	AR	MA0007.2	ADCY3	ENSG00000138031
chr2	101174153	101174168	AR	MA0007.2	TBC1D8-AS1	ENSG00000272902
chr2	201118760	201118775	AR	MA0007.2	CFLAR	ENSG00000003402
chr20	43751354	43751369	AR	MA0007.2	GTSF1L	ENSG00000124196
chr21	15441142	15441157	AR	MA0007.2		ENSG00000229425
chr21	15441260	15441275	AR	MA0007.2		ENSG00000229425
chr22	37115230	37115245	AR	MA0007.2	TMPRSS6	ENSG00000187045
chr3	4493138	4493153	AR	MA0007.2	ITPR1	ENSG00000150995
chr3	32458253	32458268	AR	MA0007.2	CMTM7	ENSG00000153551
chr3	56758734	56758749	AR	MA0007.2	ARHGEF3	ENSG00000163947
chr4	80183718	80183733	AR	MA0007.2	PRDM8	ENSG00000152784
chr4	121256564	121256579	AR	MA0007.2	TNIP3	ENSG00000050730
chr4	185143015	185143030	AR	MA0007.2	SLC25A4	ENSG00000151729
chr6	44265095	44265110	AR	MA0007.2	NFKBIE	ENSG00000146232
chr6	144063932	144063947	AR	MA0007.2	PLAGL1	ENSG00000118495
chr7	76009144	76009159	AR	MA0007.2	TMEM120A	ENSG00000189077
chr9	109416268	109416283	AR	MA0007.2	PTPN3	ENSG00000070159
chr9	136882806	136882821	AR	MA0007.2	TRAF2	ENSG00000127191
chrX	30652994	30653009	AR	MA0007.2	GK	ENSG00000198814
chr1	12173862	12173875	ATF2	MA1632.1	TNFRSF1B	ENSG00000028137
chr1	12173880	12173893	ATF2	MA1632.1	TNFRSF1B	ENSG00000028137
chr1	24744976	24744989	ATF2	MA1632.1	CLIC4	ENSG00000169504
chr1	67683974	67683987	ATF2	MA1632.1	GADD45A	ENSG00000116717
chr10	102395628	102395641	ATF2	MA1632.1	NFKB2	ENSG00000077150
chr11	65426450	65426463	ATF2	MA1632.1	NEAT1	ENSG00000245532
chr11	83071917	83071930	ATF2	MA1632.1	RAB30	ENSG00000137502
chr11	130069837	130069850	ATF2	MA1632.1	APLP2	ENSG00000084234
chr12	12562624	12562637	ATF2	MA1632.1	DUSP16	ENSG00000111266
chr12	123115814	123115827	ATF2	MA1632.1	PITPNM2	ENSG00000090975
chr14	55271346	55271359	ATF2	MA1632.1	FBXO34	ENSG00000178974
chr14	75543024	75543037	ATF2	MA1632.1	BATF	ENSG00000156127
chr14	91246223	91246236	ATF2	MA1632.1	GPR68	ENSG00000119714
chr16	27367779	27367792	ATF2	MA1632.1	IL4R	ENSG00000077238
chr16	27368312	27368325	ATF2	MA1632.1	IL4R	ENSG00000077238
chr16	27401969	27401982	ATF2	MA1632.1	IL21R	ENSG00000103522
chr16	68756450	68756463	ATF2	MA1632.1	CDH1	ENSG00000039068
chr17	43212081	43212094	ATF2	MA1632.1	TMEM106A	ENSG00000184988
chr18	3594048	3594061	ATF2	MA1632.1	DLGAP1-AS1	ENSG00000177337
chr19	10416766	10416779	ATF2	MA1632.1	PDE4A	ENSG00000065989
chr19	45001352	45001365	ATF2	MA1632.1	RELB	ENSG00000104856
chr2	178523128	178523141	ATF2	MA1632.1	TTN-AS1	ENSG00000237298
chr2	218880442	218880455	ATF2	MA1632.1	WNT10A	ENSG00000135925
chr20	34704280	34704293	ATF2	MA1632.1	TP53INP2	ENSG00000078804
chr20	34704657	34704670	ATF2	MA1632.1	TP53INP2	ENSG00000078804
chr21	15065939	15065952	ATF2	MA1632.1	NRIP1	ENSG00000180530
chr22	41940979	41940992	ATF2	MA1632.1	CENPM	ENSG00000100162
chr3	8501636	8501649	ATF2	MA1632.1	LMCD1	ENSG00000071282
chr3	29687046	29687059	ATF2	MA1632.1	RBMS3	ENSG00000144642
chr3	101851255	101851268	ATF2	MA1632.1	NFKBIZ	ENSG00000144802
chr3	105368823	105368836	ATF2	MA1632.1	ALCAM	ENSG00000170017
chr3	130850229	130850242	ATF2	MA1632.1	ATP2C1	ENSG00000017260
chr3	183286020	183286033	ATF2	MA1632.1	B3GNT5	ENSG00000176597
chr4	10671732	10671745	ATF2	MA1632.1	CLNK	ENSG00000109684
chr5	150411488	150411501	ATF2	MA1632.1	CD74	ENSG00000019582
chr5	170312884	170312897	ATF2	MA1632.1		ENSG00000250274
chr6	119350520	119350533	ATF2	MA1632.1	MAN1A1	ENSG00000111885
chr6	129490580	129490593	ATF2	MA1632.1	LAMA2	ENSG00000196569
chr7	39733367	39733380	ATF2	MA1632.1	LINC00265	ENSG00000188185
chr7	104944550	104944563	ATF2	MA1632.1		ENSG00000237513
chr7	138002255	138002268	ATF2	MA1632.1	CREB3L2	ENSG00000182158
chr8	37882051	37882064	ATF2	MA1632.1	RAB11FIP1	ENSG00000156675
chr8	37892034	37892047	ATF2	MA1632.1	RAB11FIP1	ENSG00000156675
chr8	80864800	80864813	ATF2	MA1632.1	ZNF704	ENSG00000164684
chr8	97775734	97775747	ATF2	MA1632.1	LAPTM4B	ENSG00000104341
chr8	124673587	124673600	ATF2	MA1632.1	MTSS1	ENSG00000170873
chr9	120931663	120931676	ATF2	MA1632.1	TRAF1	ENSG00000056558
chr9	120931706	120931719	ATF2	MA1632.1	TRAF1	ENSG00000056558
chr9	129488626	129488639	ATF2	MA1632.1	LINC00963	ENSG00000204054
chr9	129496081	129496094	ATF2	MA1632.1	LINC00963	ENSG00000204054
chr1	67333280	67333294	ATF4	MA0833.2	IL12RB2	ENSG00000081985
chr1	67684009	67684023	ATF4	MA0833.2	GADD45A	ENSG00000116717
chr1	165914387	165914401	ATF4	MA0833.2	UCK2	ENSG00000143179
chr10	17655693	17655707	ATF4	MA0833.2	STAM	ENSG00000136738
chr11	65425319	65425333	ATF4	MA0833.2	NEAT1	ENSG00000245532
chr11	65426296	65426310	ATF4	MA0833.2	NEAT1	ENSG00000245532
chr11	65426449	65426463	ATF4	MA0833.2	NEAT1	ENSG00000245532
chr11	83071916	83071930	ATF4	MA0833.2	RAB30	ENSG00000137502
chr12	12561193	12561207	ATF4	MA0833.2	DUSP16	ENSG00000111266
chr12	123115814	123115828	ATF4	MA0833.2	PITPNM2	ENSG00000090975
chr13	40485952	40485966	ATF4	MA0833.2	LINC00598	ENSG00000215483
chr13	75326744	75326758	ATF4	MA0833.2	TBC1D4	ENSG00000136111
chr15	52256673	52256687	ATF4	MA0833.2	MYO5C	ENSG00000128833
chr17	3683127	3683141	ATF4	MA0833.2	P2RX5	ENSG00000083454
chr17	81937378	81937392	ATF4	MA0833.2	PYCR1	ENSG00000183010
chr18	59900928	59900942	ATF4	MA0833.2	PMAIP1	ENSG00000141682
chr19	2476348	2476362	ATF4	MA0833.2	GADD45B	ENSG00000099860
chr2	74199209	74199223	ATF4	MA0833.2	MTHFD2	ENSG00000065911
chr2	178523128	178523142	ATF4	MA0833.2	TTN-AS1	ENSG00000237298
chr2	203871584	203871598	ATF4	MA0833.2	CTLA4	ENSG00000163599
chr21	15065938	15065952	ATF4	MA0833.2	NRIP1	ENSG00000180530
chr22	41941474	41941488	ATF4	MA0833.2	CENPM	ENSG00000100162
chr3	183286338	183286352	ATF4	MA0833.2	B3GNT5	ENSG00000176597
chr3	187745434	187745448	ATF4	MA0833.2	BCL6	ENSG00000113916
chr4	80182201	80182215	ATF4	MA0833.2	PRDM8	ENSG00000152784
chr7	97872465	97872479	ATF4	MA0833.2	ASNS	ENSG00000070669
chr7	131108112	131108126	ATF4	MA0833.2	LINC-PINT	ENSG00000231721
chr8	12754147	12754161	ATF4	MA0833.2	LONRF1	ENSG00000154359
chr9	89604670	89604684	ATF4	MA0833.2	GADD45G	ENSG00000130222
chr1	1208450	1208464	ATF6	MA1466.1	TNFRSF18	ENSG00000186891
chr1	8026423	8026437	ATF6	MA1466.1	ERRFI1	ENSG00000116285
chr1	12127709	12127723	ATF6	MA1466.1	TNFRSF8	ENSG00000120949
chr1	92476335	92476349	ATF6	MA1466.1	GFI1	ENSG00000162676
chr1	148952033	148952047	ATF6	MA1466.1	PDE4DIP	ENSG00000178104
chr1	153545259	153545273	ATF6	MA1466.1	S100A4	ENSG00000196154
chr1	185316297	185316311	ATF6	MA1466.1	IVNS1ABP	ENSG00000116679
chr10	126041725	126041739	ATF6	MA1466.1	ADAM12	ENSG00000148848
chr11	57649976	57649990	ATF6	MA1466.1	YPEL4	ENSG00000166793
chr11	65421333	65421347	ATF6	MA1466.1	NEAT1	ENSG00000245532
chr11	65426449	65426463	ATF6	MA1466.1	NEAT1	ENSG00000245532
chr12	104958395	104958409	ATF6	MA1466.1	SLC41A2	ENSG00000136052
chr14	35404547	35404561	ATF6	MA1466.1	NFKBIA	ENSG00000100906
chr15	67521351	67521365	ATF6	MA1466.1	IQCH-AS1	ENSG00000259673
chr16	11742841	11742855	ATF6	MA1466.1	TXNDC11	ENSG00000153066
chr16	81779259	81779273	ATF6	MA1466.1	PLCG2	ENSG00000197943
chr17	14309368	14309382	ATF6	MA1466.1		ENSG00000266709
chr17	45316943	45316957	ATF6	MA1466.1	MAP3K14	ENSG00000006062
chr17	68457461	68457475	ATF6	MA1466.1	WIPI1	ENSG00000070540
chr18	3594238	3594252	ATF6	MA1466.1	DLGAP1-AS1	ENSG00000177337
chr19	8343311	8343325	ATF6	MA1466.1	KANK3	ENSG00000186994
chr19	10416733	10416747	ATF6	MA1466.1	PDE4A	ENSG00000065989
chr19	44753495	44753509	ATF6	MA1466.1	BCL3	ENSG00000069399
chr2	60881168	60881182	ATF6	MA1466.1	REL	ENSG00000162924
chr2	218892805	218892819	ATF6	MA1466.1	WNT10A	ENSG00000135925
chr2	240565752	240565766	ATF6	MA1466.1	RNPEPL1	ENSG00000142327
chr2	240566070	240566084	ATF6	MA1466.1	RNPEPL1	ENSG00000142327
chr20	34704685	34704699	ATF6	MA1466.1	TP53INP2	ENSG00000078804
chr22	41781311	41781325	ATF6	MA1466.1	MEI1	ENSG00000167077
chr22	41941451	41941465	ATF6	MA1466.1	CENPM	ENSG00000100162
chr3	17742643	17742657	ATF6	MA1466.1	TBC1D5	ENSG00000131374
chr4	8229159	8229173	ATF6	MA1466.1	SH3TC1	ENSG00000125089
chr4	8229266	8229280	ATF6	MA1466.1	SH3TC1	ENSG00000125089
chr6	20403518	20403532	ATF6	MA1466.1	E2F3	ENSG00000112242
chr6	53548195	53548209	ATF6	MA1466.1	GCLC	ENSG00000001084
chr6	118559109	118559123	ATF6	MA1466.1	PLN	ENSG00000198523
chr6	144064144	144064158	ATF6	MA1466.1	PLAGL1	ENSG00000118495
chr7	131106707	131106721	ATF6	MA1466.1	LINC-PINT	ENSG00000231721
chr8	12754472	12754486	ATF6	MA1466.1	LONRF1	ENSG00000154359
chr8	12754566	12754580	ATF6	MA1466.1	LONRF1	ENSG00000154359
chr9	96450015	96450029	ATF6	MA1466.1	HABP4	ENSG00000130956
chr1	12173862	12173876	ATF7	MA0834.1	TNFRSF1B	ENSG00000028137
chr1	24744976	24744990	ATF7	MA0834.1	CLIC4	ENSG00000169504
chr10	102395627	102395641	ATF7	MA0834.1	NFKB2	ENSG00000077150
chr11	65426449	65426463	ATF7	MA0834.1	NEAT1	ENSG00000245532
chr11	83071916	83071930	ATF7	MA0834.1	RAB30	ENSG00000137502
chr11	117986343	117986357	ATF7	MA0834.1	IL10RA	ENSG00000110324
chr11	119317151	119317165	ATF7	MA0834.1	MCAM	ENSG00000076706
chr12	12562624	12562638	ATF7	MA0834.1	DUSP16	ENSG00000111266
chr12	12562652	12562666	ATF7	MA0834.1	DUSP16	ENSG00000111266
chr14	55271345	55271359	ATF7	MA0834.1	FBXO34	ENSG00000178974
chr16	27367779	27367793	ATF7	MA0834.1	IL4R	ENSG00000077238
chr16	27401969	27401983	ATF7	MA0834.1	IL21R	ENSG00000103522
chr16	68756449	68756463	ATF7	MA0834.1	CDH1	ENSG00000039068
chr17	43212081	43212095	ATF7	MA0834.1	TMEM106A	ENSG00000184988
chr19	10416733	10416747	ATF7	MA0834.1	PDE4A	ENSG00000065989
chr19	10416766	10416780	ATF7	MA0834.1	PDE4A	ENSG00000065989
chr19	45001352	45001366	ATF7	MA0834.1	RELB	ENSG00000104856
chr2	178523128	178523142	ATF7	MA0834.1	TTN-AS1	ENSG00000237298
chr2	218880441	218880455	ATF7	MA0834.1	WNT10A	ENSG00000135925
chr20	34704279	34704293	ATF7	MA0834.1	TP53INP2	ENSG00000078804
chr20	34704656	34704670	ATF7	MA0834.1	TP53INP2	ENSG00000078804
chr20	34704685	34704699	ATF7	MA0834.1	TP53INP2	ENSG00000078804
chr20	34709431	34709445	ATF7	MA0834.1	TP53INP2	ENSG00000078804
chr22	41940978	41940992	ATF7	MA0834.1	CENPM	ENSG00000100162
chr3	8501636	8501650	ATF7	MA0834.1	LMCD1	ENSG00000071282
chr3	29687046	29687060	ATF7	MA0834.1	RBMS3	ENSG00000144642
chr3	183286020	183286034	ATF7	MA0834.1	B3GNT5	ENSG00000176597
chr4	144646077	144646091	ATF7	MA0834.1	HHIP	ENSG00000164161
chr5	170312883	170312897	ATF7	MA0834.1		ENSG00000250274
chr7	8132136	8132150	ATF7	MA0834.1		ENSG00000227719
chr7	39733366	39733380	ATF7	MA0834.1	LINC00265	ENSG00000188185
chr7	104944550	104944564	ATF7	MA0834.1		ENSG00000237513
chr7	138002254	138002268	ATF7	MA0834.1	CREB3L2	ENSG00000182158
chr8	37882050	37882064	ATF7	MA0834.1	RAB11FIP1	ENSG00000156675
chr8	37892033	37892047	ATF7	MA0834.1	RAB11FIP1	ENSG00000156675
chr8	97775734	97775748	ATF7	MA0834.1	LAPTM4B	ENSG00000104341
chr8	124673586	124673600	ATF7	MA0834.1	MTSS1	ENSG00000170873
chr9	114505569	114505583	ATF7	MA0834.1	WHRN	ENSG00000095397
chr9	129496081	129496095	ATF7	MA0834.1	LINC00963	ENSG00000204054
chr1	1201579	1201592	BACH1	MA1633.1	TNFRSF18	ENSG00000186891
chr1	1208145	1208158	BACH1	MA1633.1	TNFRSF18	ENSG00000186891
chr1	15417682	15417695	BACH1	MA1633.1	EFHD2	ENSG00000142634
chr1	24192108	24192121	BACH1	MA1633.1	IFNLR1	ENSG00000185436
chr1	26787710	26787723	BACH1	MA1633.1	PIGV	ENSG00000060642
chr1	37479824	37479837	BACH1	MA1633.1	ZC3H12A	ENSG00000163874
chr1	67686069	67686082	BACH1	MA1633.1	GADD45A	ENSG00000116717
chr1	92486013	92486026	BACH1	MA1633.1	GFI1	ENSG00000162676
chr1	148952527	148952540	BACH1	MA1633.1	PDE4DIP	ENSG00000178104
chr1	156836201	156836214	BACH1	MA1633.1	NTRK1	ENSG00000198400
chr1	185318039	185318052	BACH1	MA1633.1	IVNS1ABP	ENSG00000116679
chr1	205284857	205284870	BACH1	MA1633.1	TMCC2	ENSG00000133069
chr1	223726880	223726893	BACH1	MA1633.1	CAPN2	ENSG00000162909
chr10	5977657	5977670	BACH1	MA1633.1	IL15RA	ENSG00000134470
chr10	17646152	17646165	BACH1	MA1633.1	STAM	ENSG00000136738
chr10	88990551	88990564	BACH1	MA1633.1	FAS	ENSG00000026103
chr10	97292996	97293009	BACH1	MA1633.1	ARHGAP19	ENSG00000213390
chr10	100009944	100009957	BACH1	MA1633.1	DNMBP	ENSG00000107554
chr10	102410709	102410722	BACH1	MA1633.1	PSD	ENSG00000059915
chr11	45103006	45103019	BACH1	MA1633.1	PRDM11	ENSG00000019485
chr11	57649943	57649956	BACH1	MA1633.1	YPEL4	ENSG00000166793
chr11	62556412	62556425	BACH1	MA1633.1	AHNAK	ENSG00000124942
chr11	62556728	62556741	BACH1	MA1633.1	AHNAK	ENSG00000124942
chr11	65418828	65418841	BACH1	MA1633.1	NEAT1	ENSG00000245532
chr11	117987265	117987278	BACH1	MA1633.1	IL10RA	ENSG00000110324
chr13	30396624	30396637	BACH1	MA1633.1	LINC00426	ENSG00000238121
chr14	35403624	35403637	BACH1	MA1633.1	NFKBIA	ENSG00000100906
chr14	75566528	75566541	BACH1	MA1633.1	FLVCR2	ENSG00000119686
chr14	91246264	91246277	BACH1	MA1633.1	GPR68	ENSG00000119714
chr16	27318611	27318624	BACH1	MA1633.1	IL4R	ENSG00000077238
chr16	27379124	27379137	BACH1	MA1633.1	IL21R	ENSG00000103522
chr16	27402232	27402245	BACH1	MA1633.1	IL21R	ENSG00000103522
chr16	68418399	68418412	BACH1	MA1633.1	SMPD3	ENSG00000103056
chr16	68448495	68448508	BACH1	MA1633.1	SMPD3	ENSG00000103056
chr17	68292200	68292213	BACH1	MA1633.1	ARSG	ENSG00000141337
chr18	45687056	45687069	BACH1	MA1633.1	SLC14A1	ENSG00000141469
chr18	75071132	75071145	BACH1	MA1633.1		ENSG00000278607
chr19	11346515	11346528	BACH1	MA1633.1	CCDC159	ENSG00000183401
chr19	12333808	12333821	BACH1	MA1633.1	ZNF563	ENSG00000188868
chr19	44747457	44747470	BACH1	MA1633.1	BCL3	ENSG00000069399
chr19	44747618	44747631	BACH1	MA1633.1	BCL3	ENSG00000069399
chr19	45001947	45001960	BACH1	MA1633.1	RELB	ENSG00000104856
chr2	240565880	240565893	BACH1	MA1633.1	RNPEPL1	ENSG00000142327
chr20	43736666	43736679	BACH1	MA1633.1	GTSF1L	ENSG00000124196
chr22	37149825	37149838	BACH1	MA1633.1	IL2RB	ENSG00000100385
chr3	14432410	14432423	BACH1	MA1633.1	SLC6A6	ENSG00000131389
chr3	14432439	14432452	BACH1	MA1633.1	SLC6A6	ENSG00000131389
chr3	32460572	32460585	BACH1	MA1633.1	CMTM7	ENSG00000153551
chr3	66469310	66469323	BACH1	MA1633.1	LRIG1	ENSG00000144749
chr3	66472809	66472822	BACH1	MA1633.1	LRIG1	ENSG00000144749
chr3	101518537	101518550	BACH1	MA1633.1	FAM172BP	ENSG00000175841
chr4	8228748	8228761	BACH1	MA1633.1	SH3TC1	ENSG00000125089
chr4	80173606	80173619	BACH1	MA1633.1	PRDM8	ENSG00000152784
chr4	121256484	121256497	BACH1	MA1633.1	TNIP3	ENSG00000050730
chr4	121256591	121256604	BACH1	MA1633.1	TNIP3	ENSG00000050730
chr4	139657921	139657934	BACH1	MA1633.1	MGST2	ENSG00000085871
chr4	173370080	173370093	BACH1	MA1633.1	SAP30-DT	ENSG00000272870
chr4	173370801	173370814	BACH1	MA1633.1	SAP30-DT	ENSG00000272870
chr5	95081698	95081711	BACH1	MA1633.1	MCTP1	ENSG00000175471
chr6	33075864	33075877	BACH1	MA1633.1	HLA-DPB1	ENSG00000223865
chr6	53548246	53548259	BACH1	MA1633.1	GCLC	ENSG00000001084
chr6	150600430	150600443	BACH1	MA1633.1	PLEKHG1	ENSG00000120278
chr7	1044231	1044244	BACH1	MA1633.1	GPR146	ENSG00000164849
chr7	26864814	26864827	BACH1	MA1633.1	SKAP2	ENSG00000005020
chr7	26864829	26864842	BACH1	MA1633.1	SKAP2	ENSG00000005020
chr7	55533471	55533484	BACH1	MA1633.1	VOPP1	ENSG00000154978
chr7	75738931	75738944	BACH1	MA1633.1	HIP1	ENSG00000127946
chr7	104945267	104945280	BACH1	MA1633.1		ENSG00000237513
chr9	89605120	89605133	BACH1	MA1633.1	GADD45G	ENSG00000130222
chr9	89701630	89701643	BACH1	MA1633.1		ENSG00000237372
chr9	93134845	93134858	BACH1	MA1633.1	NINJ1	ENSG00000131669
chr9	109416227	109416240	BACH1	MA1633.1	PTPN3	ENSG00000070159
chr9	109417241	109417254	BACH1	MA1633.1	PTPN3	ENSG00000070159
chr9	129488674	129488687	BACH1	MA1633.1	LINC00963	ENSG00000204054
chrX	154369084	154369097	BACH1	MA1633.1	FLNA	ENSG00000196924
chr1	1208141	1208160	BACH2	MA1101.2	TNFRSF18	ENSG00000186891
chr1	12127609	12127628	BACH2	MA1101.2	TNFRSF8	ENSG00000120949
chr1	12178775	12178794	BACH2	MA1101.2	TNFRSF1B	ENSG00000028137
chr1	15417678	15417697	BACH2	MA1101.2	EFHD2	ENSG00000142634
chr1	24192104	24192123	BACH2	MA1101.2	IFNLR1	ENSG00000185436
chr1	89126132	89126151	BACH2	MA1101.2	GBP2	ENSG00000162645
chr1	205284853	205284872	BACH2	MA1101.2	TMCC2	ENSG00000133069
chr1	223726876	223726895	BACH2	MA1101.2	CAPN2	ENSG00000162909
chr10	5977653	5977672	BACH2	MA1101.2	IL15RA	ENSG00000134470
chr10	17646150	17646169	BACH2	MA1101.2	STAM	ENSG00000136738
chr10	97292992	97293011	BACH2	MA1101.2	ARHGAP19	ENSG00000213390
chr10	99994513	99994532	BACH2	MA1101.2	DNMBP	ENSG00000107554
chr10	102394445	102394464	BACH2	MA1101.2	NFKB2	ENSG00000077150
chr10	102410707	102410726	BACH2	MA1101.2	PSD	ENSG00000059915
chr11	57649939	57649958	BACH2	MA1101.2	YPEL4	ENSG00000166793
chr11	62556408	62556427	BACH2	MA1101.2	AHNAK	ENSG00000124942
chr11	62556726	62556745	BACH2	MA1101.2	AHNAK	ENSG00000124942
chr11	83071738	83071757	BACH2	MA1101.2	RAB30	ENSG00000137502
chr11	102317257	102317276	BACH2	MA1101.2	BIRC3	ENSG00000023445
chr11	102317439	102317458	BACH2	MA1101.2	BIRC3	ENSG00000023445
chr11	107840944	107840963	BACH2	MA1101.2	SLC35F2	ENSG00000110660
chr12	11981338	11981357	BACH2	MA1101.2	BCL2L14	ENSG00000121380
chr16	8675248	8675267	BACH2	MA1101.2	ABAT	ENSG00000183044
chr16	27318609	27318628	BACH2	MA1101.2	IL4R	ENSG00000077238
chr16	88457044	88457063	BACH2	MA1101.2	ZFPM1	ENSG00000179588
chr18	3625026	3625045	BACH2	MA1101.2	DLGAP1-AS2	ENSG00000262001
chr19	32794550	32794569	BACH2	MA1101.2	TDRD12	ENSG00000173809
chr19	44747616	44747635	BACH2	MA1101.2	BCL3	ENSG00000069399
chr2	203871659	203871678	BACH2	MA1101.2	CTLA4	ENSG00000163599
chr2	240565876	240565895	BACH2	MA1101.2	RNPEPL1	ENSG00000142327
chr20	43751381	43751400	BACH2	MA1101.2	GTSF1L	ENSG00000124196
chr21	14534187	14534206	BACH2	MA1101.2	SAMSN1	ENSG00000155307
chr22	41941543	41941562	BACH2	MA1101.2	CENPM	ENSG00000100162
chr3	66469306	66469325	BACH2	MA1101.2	LRIG1	ENSG00000144749
chr3	183285915	183285934	BACH2	MA1101.2	B3GNT5	ENSG00000176597
chr4	8228746	8228765	BACH2	MA1101.2	SH3TC1	ENSG00000125089
chr4	139657919	139657938	BACH2	MA1101.2	MGST2	ENSG00000085871
chr4	173369746	173369765	BACH2	MA1101.2	SAP30-DT	ENSG00000272870
chr6	16685440	16685459	BACH2	MA1101.2	ATXN1	ENSG00000124788
chr6	33075860	33075879	BACH2	MA1101.2	HLA-DPB1	ENSG00000223865
chr6	53548242	53548261	BACH2	MA1101.2	GCLC	ENSG00000001084
chr6	129490648	129490667	BACH2	MA1101.2	LAMA2	ENSG00000196569
chr6	144151410	144151429	BACH2	MA1101.2	STX11	ENSG00000135604
chr6	149485122	149485141	BACH2	MA1101.2	ZC3H12D	ENSG00000178199
chr7	18639366	18639385	BACH2	MA1101.2	HDAC9	ENSG00000048052
chr8	80864975	80864994	BACH2	MA1101.2	ZNF704	ENSG00000164684
chr9	93134843	93134862	BACH2	MA1101.2	NINJ1	ENSG00000131669
chr9	109417237	109417256	BACH2	MA1101.2	PTPN3	ENSG00000070159
chr9	136882705	136882724	BACH2	MA1101.2	TRAF2	ENSG00000127191
chr1	1201581	1201592	BATF	MA1634.1	TNFRSF18	ENSG00000186891
chr1	1208145	1208156	BATF	MA1634.1	TNFRSF18	ENSG00000186891
chr1	15417682	15417693	BATF	MA1634.1	EFHD2	ENSG00000142634
chr1	24192108	24192119	BATF	MA1634.1	IFNLR1	ENSG00000185436
chr1	37479824	37479835	BATF	MA1634.1	ZC3H12A	ENSG00000163874
chr1	67686069	67686080	BATF	MA1634.1	GADD45A	ENSG00000116717
chr1	89126136	89126147	BATF	MA1634.1	GBP2	ENSG00000162645
chr1	156097107	156097118	BATF	MA1634.1	LMNA	ENSG00000160789
chr1	185318041	185318052	BATF	MA1634.1	IVNS1ABP	ENSG00000116679
chr1	205284857	205284868	BATF	MA1634.1	TMCC2	ENSG00000133069
chr1	223726855	223726866	BATF	MA1634.1	CAPN2	ENSG00000162909
chr1	223726880	223726891	BATF	MA1634.1	CAPN2	ENSG00000162909
chr10	5977657	5977668	BATF	MA1634.1	IL15RA	ENSG00000134470
chr10	17644007	17644018	BATF	MA1634.1	STAM	ENSG00000136738
chr10	17646154	17646165	BATF	MA1634.1	STAM	ENSG00000136738
chr10	97292777	97292788	BATF	MA1634.1	ARHGAP19	ENSG00000213390
chr10	97292996	97293007	BATF	MA1634.1	ARHGAP19	ENSG00000213390
chr10	100009944	100009955	BATF	MA1634.1	DNMBP	ENSG00000107554
chr10	102410711	102410722	BATF	MA1634.1	PSD	ENSG00000059915
chr11	45103008	45103019	BATF	MA1634.1	PRDM11	ENSG00000019485
chr11	57649943	57649954	BATF	MA1634.1	YPEL4	ENSG00000166793
chr11	62556412	62556423	BATF	MA1634.1	AHNAK	ENSG00000124942
chr11	62556730	62556741	BATF	MA1634.1	AHNAK	ENSG00000124942
chr11	65425430	65425441	BATF	MA1634.1	NEAT1	ENSG00000245532
chr11	83071742	83071753	BATF	MA1634.1	RAB30	ENSG00000137502
chr11	107840879	107840890	BATF	MA1634.1	SLC35F2	ENSG00000110660
chr11	107840948	107840959	BATF	MA1634.1	SLC35F2	ENSG00000110660
chr12	11981342	11981353	BATF	MA1634.1	BCL2L14	ENSG00000121380
chr12	123120011	123120022	BATF	MA1634.1	PITPNM2	ENSG00000090975
chr13	30396624	30396635	BATF	MA1634.1	LINC00426	ENSG00000238121
chr16	27318613	27318624	BATF	MA1634.1	IL4R	ENSG00000077238
chr16	68418278	68418289	BATF	MA1634.1	SMPD3	ENSG00000103056
chr16	68418401	68418412	BATF	MA1634.1	SMPD3	ENSG00000103056
chr16	68756493	68756504	BATF	MA1634.1	CDH1	ENSG00000039068
chr16	88457048	88457059	BATF	MA1634.1	ZFPM1	ENSG00000179588
chr17	43211838	43211849	BATF	MA1634.1	TMEM106A	ENSG00000184988
chr17	68292202	68292213	BATF	MA1634.1	ARSG	ENSG00000141337
chr18	3625030	3625041	BATF	MA1634.1	DLGAP1-AS2	ENSG00000262001
chr18	75071134	75071145	BATF	MA1634.1		ENSG00000278607
chr19	2474889	2474900	BATF	MA1634.1	GADD45B	ENSG00000099860
chr19	2476629	2476640	BATF	MA1634.1	GADD45B	ENSG00000099860
chr19	11346356	11346367	BATF	MA1634.1	CCDC159	ENSG00000183401
chr19	11346515	11346526	BATF	MA1634.1	CCDC159	ENSG00000183401
chr19	44747457	44747468	BATF	MA1634.1	BCL3	ENSG00000069399
chr19	44747620	44747631	BATF	MA1634.1	BCL3	ENSG00000069399
chr19	45001947	45001958	BATF	MA1634.1	RELB	ENSG00000104856
chr19	45002062	45002073	BATF	MA1634.1	RELB	ENSG00000104856
chr2	203871663	203871674	BATF	MA1634.1	CTLA4	ENSG00000163599
chr2	240565880	240565891	BATF	MA1634.1	RNPEPL1	ENSG00000142327
chr20	43751385	43751396	BATF	MA1634.1	GTSF1L	ENSG00000124196
chr20	43751465	43751476	BATF	MA1634.1	GTSF1L	ENSG00000124196
chr21	14534175	14534186	BATF	MA1634.1	SAMSN1	ENSG00000155307
chr21	14534191	14534202	BATF	MA1634.1	SAMSN1	ENSG00000155307
chr3	14432412	14432423	BATF	MA1634.1	SLC6A6	ENSG00000131389
chr3	14432441	14432452	BATF	MA1634.1	SLC6A6	ENSG00000131389
chr3	29687106	29687117	BATF	MA1634.1	RBMS3	ENSG00000144642
chr3	32460475	32460486	BATF	MA1634.1	CMTM7	ENSG00000153551
chr3	66469310	66469321	BATF	MA1634.1	LRIG1	ENSG00000144749
chr3	66472811	66472822	BATF	MA1634.1	LRIG1	ENSG00000144749
chr3	101518537	101518548	BATF	MA1634.1	FAM172BP	ENSG00000175841
chr3	183285919	183285930	BATF	MA1634.1	B3GNT5	ENSG00000176597
chr4	8228750	8228761	BATF	MA1634.1	SH3TC1	ENSG00000125089
chr4	121138180	121138191	BATF	MA1634.1	TNIP3	ENSG00000050730
chr4	121256484	121256495	BATF	MA1634.1	TNIP3	ENSG00000050730
chr4	121256591	121256602	BATF	MA1634.1	TNIP3	ENSG00000050730
chr4	139657923	139657934	BATF	MA1634.1	MGST2	ENSG00000085871
chr5	95081698	95081709	BATF	MA1634.1	MCTP1	ENSG00000175471
chr6	16685396	16685407	BATF	MA1634.1	ATXN1	ENSG00000124788
chr6	33075864	33075875	BATF	MA1634.1	HLA-DPB1	ENSG00000223865
chr6	44265737	44265748	BATF	MA1634.1	NFKBIE	ENSG00000146232
chr6	53548246	53548257	BATF	MA1634.1	GCLC	ENSG00000001084
chr6	129490652	129490663	BATF	MA1634.1	LAMA2	ENSG00000196569
chr6	144151414	144151425	BATF	MA1634.1	STX11	ENSG00000135604
chr6	149485126	149485137	BATF	MA1634.1	ZC3H12D	ENSG00000178199
chr7	1044231	1044242	BATF	MA1634.1	GPR146	ENSG00000164849
chr7	18639370	18639381	BATF	MA1634.1	HDAC9	ENSG00000048052
chr7	48088956	48088967	BATF	MA1634.1	UPP1	ENSG00000183696
chr7	55533471	55533482	BATF	MA1634.1	VOPP1	ENSG00000154978
chr7	55534480	55534491	BATF	MA1634.1	VOPP1	ENSG00000154978
chr7	55534562	55534573	BATF	MA1634.1	VOPP1	ENSG00000154978
chr8	80864979	80864990	BATF	MA1634.1	ZNF704	ENSG00000164684
chr9	93134847	93134858	BATF	MA1634.1	NINJ1	ENSG00000131669
chr9	109417241	109417252	BATF	MA1634.1	PTPN3	ENSG00000070159
chr9	129488676	129488687	BATF	MA1634.1	LINC00963	ENSG00000204054
chr9	136882709	136882720	BATF	MA1634.1	TRAF2	ENSG00000127191
chrX	154369086	154369097	BATF	MA1634.1	FLNA	ENSG00000196924
chr1	11654874	11654890	BCL6	MA0463.2	FBXO2	ENSG00000116661
chr1	67685495	67685511	BCL6	MA0463.2	GADD45A	ENSG00000116717
chr1	94927164	94927180	BCL6	MA0463.2	CNN3	ENSG00000117519
chr1	169623602	169623618	BCL6	MA0463.2	SELP	ENSG00000174175
chr1	181090156	181090172	BCL6	MA0463.2	IER5	ENSG00000162783
chr1	223133825	223133841	BCL6	MA0463.2	TLR5	ENSG00000187554
chr10	102410662	102410678	BCL6	MA0463.2	PSD	ENSG00000059915
chr11	65421499	65421515	BCL6	MA0463.2	NEAT1	ENSG00000245532
chr11	83071968	83071984	BCL6	MA0463.2	RAB30	ENSG00000137502
chr14	35403261	35403277	BCL6	MA0463.2	NFKBIA	ENSG00000100906
chr14	35403541	35403557	BCL6	MA0463.2	NFKBIA	ENSG00000100906
chr16	27367518	27367534	BCL6	MA0463.2	IL4R	ENSG00000077238
chr16	27367687	27367703	BCL6	MA0463.2	IL4R	ENSG00000077238
chr16	88456351	88456367	BCL6	MA0463.2	ZFPM1	ENSG00000179588
chr17	45317273	45317289	BCL6	MA0463.2	MAP3K14	ENSG00000006062
chr19	44747507	44747523	BCL6	MA0463.2	BCL3	ENSG00000069399
chr19	54463434	54463450	BCL6	MA0463.2	LENG9	ENSG00000275183
chr2	26503620	26503636	BCL6	MA0463.2	OTOF	ENSG00000115155
chr2	101252867	101252883	BCL6	MA0463.2	TBC1D8	ENSG00000204634
chr21	14534074	14534090	BCL6	MA0463.2	SAMSN1	ENSG00000155307
chr3	29282059	29282075	BCL6	MA0463.2	RBMS3	ENSG00000144642
chr3	72101130	72101146	BCL6	MA0463.2	LINC00877	ENSG00000241163
chr3	101849378	101849394	BCL6	MA0463.2	NFKBIZ	ENSG00000144802
chr3	187745421	187745437	BCL6	MA0463.2	BCL6	ENSG00000113916
chr4	80173555	80173571	BCL6	MA0463.2	PRDM8	ENSG00000152784
chr4	121139853	121139869	BCL6	MA0463.2	TNIP3	ENSG00000050730
chr5	150412579	150412595	BCL6	MA0463.2	CD74	ENSG00000019582
chr7	8132194	8132210	BCL6	MA0463.2		ENSG00000227719
chr8	12754304	12754320	BCL6	MA0463.2	LONRF1	ENSG00000154359
chr9	69834837	69834853	BCL6	MA0463.2	C9orf135	ENSG00000204711
chr9	89701529	89701545	BCL6	MA0463.2		ENSG00000237372
chr1	18902944	18902954	BHLHE40	MA0464.2	ALDH4A1	ENSG00000159423
chr1	236686369	236686379	BHLHE40	MA0464.2	ACTN2	ENSG00000077522
chr11	65418835	65418845	BHLHE40	MA0464.2	NEAT1	ENSG00000245532
chr11	117987252	117987262	BHLHE40	MA0464.2	IL10RA	ENSG00000110324
chr12	642782	642792	BHLHE40	MA0464.2	NINJ2-AS1	ENSG00000177406
chr12	12561455	12561465	BHLHE40	MA0464.2	DUSP16	ENSG00000111266
chr12	40106098	40106108	BHLHE40	MA0464.2	SLC2A13	ENSG00000151229
chr13	42040462	42040472	BHLHE40	MA0464.2	DGKH	ENSG00000102780
chr14	91246182	91246192	BHLHE40	MA0464.2	GPR68	ENSG00000119714
chr15	67521659	67521669	BHLHE40	MA0464.2	IQCH-AS1	ENSG00000259673
chr16	27367498	27367508	BHLHE40	MA0464.2	IL4R	ENSG00000077238
chr17	14309370	14309380	BHLHE40	MA0464.2		ENSG00000266709
chr17	28371361	28371371	BHLHE40	MA0464.2	SARM1	ENSG00000004139
chr19	45001317	45001327	BHLHE40	MA0464.2	RELB	ENSG00000104856
chr2	218880448	218880458	BHLHE40	MA0464.2	WNT10A	ENSG00000135925
chr22	20495876	20495886	BHLHE40	MA0464.2	KLHL22	ENSG00000099910
chr22	41947162	41947172	BHLHE40	MA0464.2	CENPM	ENSG00000100162
chr3	14432078	14432088	BHLHE40	MA0464.2	SLC6A6	ENSG00000131389
chr3	17742645	17742655	BHLHE40	MA0464.2	TBC1D5	ENSG00000131374
chr3	113947861	113947871	BHLHE40	MA0464.2	ZDHHC23	ENSG00000184307
chr5	124747490	124747500	BHLHE40	MA0464.2	ZNF608	ENSG00000168916
chr5	160467958	160467968	BHLHE40	MA0464.2	MIR3142HG	ENSG00000253522
chr6	31568816	31568826	BHLHE40	MA0464.2	LTA	ENSG00000226979
chr6	43229502	43229512	BHLHE40	MA0464.2	DNPH1	ENSG00000112667
chr6	44257345	44257355	BHLHE40	MA0464.2	SLC35B2	ENSG00000157593
chr6	44257366	44257376	BHLHE40	MA0464.2	SLC35B2	ENSG00000157593
chr6	53548197	53548207	BHLHE40	MA0464.2	GCLC	ENSG00000001084
chr7	1044546	1044556	BHLHE40	MA0464.2	GPR146	ENSG00000164849
chr7	6272675	6272685	BHLHE40	MA0464.2	CYTH3	ENSG00000008256
chr7	131105878	131105888	BHLHE40	MA0464.2	LINC-PINT	ENSG00000231721
chr7	131108179	131108189	BHLHE40	MA0464.2	LINC-PINT	ENSG00000231721
chr8	37899715	37899725	BHLHE40	MA0464.2	RAB11FIP1	ENSG00000156675
chr8	94949500	94949510	BHLHE40	MA0464.2	TP53INP1	ENSG00000164938
chrX	30653161	30653171	BHLHE40	MA0464.2	GK	ENSG00000198814
chr1	12178226	12178236	CEBPB	MA0466.2	TNFRSF1B	ENSG00000028137
chr1	18902721	18902731	CEBPB	MA0466.2	ALDH4A1	ENSG00000159423
chr1	205285001	205285011	CEBPB	MA0466.2	TMCC2	ENSG00000133069
chr10	110504196	110504206	CEBPB	MA0466.2	DUSP5	ENSG00000138166
chr11	65426376	65426386	CEBPB	MA0466.2	NEAT1	ENSG00000245532
chr11	117987333	117987343	CEBPB	MA0466.2	IL10RA	ENSG00000110324
chr12	12561195	12561205	CEBPB	MA0466.2	DUSP16	ENSG00000111266
chr12	123115816	123115826	CEBPB	MA0466.2	PITPNM2	ENSG00000090975
chr14	35403875	35403885	CEBPB	MA0466.2	NFKBIA	ENSG00000100906
chr14	35404100	35404110	CEBPB	MA0466.2	NFKBIA	ENSG00000100906
chr19	2476295	2476305	CEBPB	MA0466.2	GADD45B	ENSG00000099860
chr19	2478510	2478520	CEBPB	MA0466.2	GADD45B	ENSG00000099860
chr19	11346666	11346676	CEBPB	MA0466.2	CCDC159	ENSG00000183401
chr22	30265955	30265965	CEBPB	MA0466.2	OSM	ENSG00000099985
chr6	110179957	110179967	CEBPB	MA0466.2	WASF1	ENSG00000112290
chr8	12754124	12754134	CEBPB	MA0466.2	LONRF1	ENSG00000154359
chr8	12754149	12754159	CEBPB	MA0466.2	LONRF1	ENSG00000154359
chr9	5450500	5450510	CEBPB	MA0466.2	CD274	ENSG00000120217
chr1	12178226	12178236	CEBPE	MA0837.1	TNFRSF1B	ENSG00000028137
chr1	18902721	18902731	CEBPE	MA0837.1	ALDH4A1	ENSG00000159423
chr1	205285001	205285011	CEBPE	MA0837.1	TMCC2	ENSG00000133069
chr10	110504196	110504206	CEBPE	MA0837.1	DUSP5	ENSG00000138166
chr11	65426376	65426386	CEBPE	MA0837.1	NEAT1	ENSG00000245532
chr11	117987333	117987343	CEBPE	MA0837.1	IL10RA	ENSG00000110324
chr12	12561195	12561205	CEBPE	MA0837.1	DUSP16	ENSG00000111266
chr12	123115816	123115826	CEBPE	MA0837.1	PITPNM2	ENSG00000090975
chr14	35403875	35403885	CEBPE	MA0837.1	NFKBIA	ENSG00000100906
chr14	35404100	35404110	CEBPE	MA0837.1	NFKBIA	ENSG00000100906
chr19	2476295	2476305	CEBPE	MA0837.1	GADD45B	ENSG00000099860
chr19	2478510	2478520	CEBPE	MA0837.1	GADD45B	ENSG00000099860
chr19	11346666	11346676	CEBPE	MA0837.1	CCDC159	ENSG00000183401
chr22	30265955	30265965	CEBPE	MA0837.1	OSM	ENSG00000099985
chr6	110179957	110179967	CEBPE	MA0837.1	WASF1	ENSG00000112290
chr8	12754124	12754134	CEBPE	MA0837.1	LONRF1	ENSG00000154359
chr8	12754149	12754159	CEBPE	MA0837.1	LONRF1	ENSG00000154359
chr9	5450500	5450510	CEBPE	MA0837.1	CD274	ENSG00000120217
chr1	12178226	12178236	CEBPG	MA0838.1	TNFRSF1B	ENSG00000028137
chr1	18902721	18902731	CEBPG	MA0838.1	ALDH4A1	ENSG00000159423
chr11	110093227	110093237	CEBPG	MA0838.1	ZC3H12C	ENSG00000149289
chr12	12561195	12561205	CEBPG	MA0838.1	DUSP16	ENSG00000111266
chr12	123115816	123115826	CEBPG	MA0838.1	PITPNM2	ENSG00000090975
chr14	35403875	35403885	CEBPG	MA0838.1	NFKBIA	ENSG00000100906
chr19	2478510	2478520	CEBPG	MA0838.1	GADD45B	ENSG00000099860
chr19	45001186	45001196	CEBPG	MA0838.1	RELB	ENSG00000104856
chr22	30265955	30265965	CEBPG	MA0838.1	OSM	ENSG00000099985
chr6	41561032	41561042	CEBPG	MA0838.1	FOXP4	ENSG00000137166
chr6	110179957	110179967	CEBPG	MA0838.1	WASF1	ENSG00000112290
chr8	12754124	12754134	CEBPG	MA0838.1	LONRF1	ENSG00000154359
chr8	12754149	12754159	CEBPG	MA0838.1	LONRF1	ENSG00000154359
chr9	5450500	5450510	CEBPG	MA0838.1	CD274	ENSG00000120217
chr1	18902944	18902954	CLOCK	MA0819.1	ALDH4A1	ENSG00000159423
chr12	104958712	104958722	CLOCK	MA0819.1	SLC41A2	ENSG00000136052
chr14	91246182	91246192	CLOCK	MA0819.1	GPR68	ENSG00000119714
chr16	27367498	27367508	CLOCK	MA0819.1	IL4R	ENSG00000077238
chr19	54464160	54464170	CLOCK	MA0819.1	LENG9	ENSG00000275183
chr22	30265933	30265943	CLOCK	MA0819.1	OSM	ENSG00000099985
chr4	121256661	121256671	CLOCK	MA0819.1	TNIP3	ENSG00000050730
chr5	160467958	160467968	CLOCK	MA0819.1	MIR3142HG	ENSG00000253522
chr6	41546156	41546166	CLOCK	MA0819.1	FOXP4	ENSG00000137166
chr6	44223799	44223809	CLOCK	MA0819.1	SLC29A1	ENSG00000112759
chr6	52394325	52394335	CLOCK	MA0819.1	EFHC1	ENSG00000096093
chr8	27465784	27465794	CLOCK	MA0819.1	CHRNA2	ENSG00000120903
chr1	7940934	7940947	CREB1	MA0018.4	TNFRSF9	ENSG00000049249
chr1	12173862	12173875	CREB1	MA0018.4	TNFRSF1B	ENSG00000028137
chr1	12173880	12173893	CREB1	MA0018.4	TNFRSF1B	ENSG00000028137
chr1	24744976	24744989	CREB1	MA0018.4	CLIC4	ENSG00000169504
chr1	67333252	67333265	CREB1	MA0018.4	IL12RB2	ENSG00000081985
chr1	67683974	67683987	CREB1	MA0018.4	GADD45A	ENSG00000116717
chr10	17655812	17655825	CREB1	MA0018.4	STAM	ENSG00000136738
chr11	62551779	62551792	CREB1	MA0018.4	AHNAK	ENSG00000124942
chr11	65425319	65425332	CREB1	MA0018.4	NEAT1	ENSG00000245532
chr11	83071917	83071930	CREB1	MA0018.4	RAB30	ENSG00000137502
chr11	107840951	107840964	CREB1	MA0018.4	SLC35F2	ENSG00000110660
chr11	117986343	117986356	CREB1	MA0018.4	IL10RA	ENSG00000110324
chr11	119317152	119317165	CREB1	MA0018.4	MCAM	ENSG00000076706
chr11	130069837	130069850	CREB1	MA0018.4	APLP2	ENSG00000084234
chr12	12562624	12562637	CREB1	MA0018.4	DUSP16	ENSG00000111266
chr12	104720852	104720865	CREB1	MA0018.4	SLC41A2	ENSG00000136052
chr13	30371783	30371796	CREB1	MA0018.4	LINC00426	ENSG00000238121
chr14	55271345	55271358	CREB1	MA0018.4	FBXO34	ENSG00000178974
chr14	75543024	75543037	CREB1	MA0018.4	BATF	ENSG00000156127
chr14	91246223	91246236	CREB1	MA0018.4	GPR68	ENSG00000119714
chr16	8675313	8675326	CREB1	MA0018.4	ABAT	ENSG00000183044
chr16	27367780	27367793	CREB1	MA0018.4	IL4R	ENSG00000077238
chr16	27401969	27401982	CREB1	MA0018.4	IL21R	ENSG00000103522
chr16	68756450	68756463	CREB1	MA0018.4	CDH1	ENSG00000039068
chr17	43212081	43212094	CREB1	MA0018.4	TMEM106A	ENSG00000184988
chr18	3594048	3594061	CREB1	MA0018.4	DLGAP1-AS1	ENSG00000177337
chr19	10416767	10416780	CREB1	MA0018.4	PDE4A	ENSG00000065989
chr19	45001353	45001366	CREB1	MA0018.4	RELB	ENSG00000104856
chr2	191678075	191678088	CREB1	MA0018.4	NABP1	ENSG00000173559
chr2	218880442	218880455	CREB1	MA0018.4	WNT10A	ENSG00000135925
chr20	34704280	34704293	CREB1	MA0018.4	TP53INP2	ENSG00000078804
chr20	36501815	36501828	CREB1	MA0018.4	DLGAP4	ENSG00000080845
chr21	15065939	15065952	CREB1	MA0018.4	NRIP1	ENSG00000180530
chr22	30265977	30265990	CREB1	MA0018.4	OSM	ENSG00000099985
chr3	8501636	8501649	CREB1	MA0018.4	LMCD1	ENSG00000071282
chr3	29687046	29687059	CREB1	MA0018.4	RBMS3	ENSG00000144642
chr3	32433311	32433324	CREB1	MA0018.4	CMTM7	ENSG00000153551
chr3	101851255	101851268	CREB1	MA0018.4	NFKBIZ	ENSG00000144802
chr3	183285963	183285976	CREB1	MA0018.4	B3GNT5	ENSG00000176597
chr3	183286020	183286033	CREB1	MA0018.4	B3GNT5	ENSG00000176597
chr4	10671453	10671466	CREB1	MA0018.4	CLNK	ENSG00000109684
chr4	10671576	10671589	CREB1	MA0018.4	CLNK	ENSG00000109684
chr4	144646077	144646090	CREB1	MA0018.4	HHIP	ENSG00000164161
chr5	150411488	150411501	CREB1	MA0018.4	CD74	ENSG00000019582
chr5	170312884	170312897	CREB1	MA0018.4		ENSG00000250274
chr7	39733367	39733380	CREB1	MA0018.4	LINC00265	ENSG00000188185
chr7	104944550	104944563	CREB1	MA0018.4		ENSG00000237513
chr7	138002255	138002268	CREB1	MA0018.4	CREB3L2	ENSG00000182158
chr8	37882051	37882064	CREB1	MA0018.4	RAB11FIP1	ENSG00000156675
chr8	37892034	37892047	CREB1	MA0018.4	RAB11FIP1	ENSG00000156675
chr8	80864800	80864813	CREB1	MA0018.4	ZNF704	ENSG00000164684
chr8	97775735	97775748	CREB1	MA0018.4	LAPTM4B	ENSG00000104341
chr8	124673587	124673600	CREB1	MA0018.4	MTSS1	ENSG00000170873
chr9	120931663	120931676	CREB1	MA0018.4	TRAF1	ENSG00000056558
chr9	129488626	129488639	CREB1	MA0018.4	LINC00963	ENSG00000204054
chr9	136882865	136882878	CREB1	MA0018.4	TRAF2	ENSG00000127191
chr1	12173861	12173877	CREM	MA0609.2	TNFRSF1B	ENSG00000028137
chr1	12173879	12173895	CREM	MA0609.2	TNFRSF1B	ENSG00000028137
chr1	24744975	24744991	CREM	MA0609.2	CLIC4	ENSG00000169504
chr1	156097092	156097108	CREM	MA0609.2	LMNA	ENSG00000160789
chr10	102395626	102395642	CREM	MA0609.2	NFKB2	ENSG00000077150
chr11	65426448	65426464	CREM	MA0609.2	NEAT1	ENSG00000245532
chr11	83071915	83071931	CREM	MA0609.2	RAB30	ENSG00000137502
chr11	117986342	117986358	CREM	MA0609.2	IL10RA	ENSG00000110324
chr11	119317150	119317166	CREM	MA0609.2	MCAM	ENSG00000076706
chr12	11981192	11981208	CREM	MA0609.2	BCL2L14	ENSG00000121380
chr12	12562651	12562667	CREM	MA0609.2	DUSP16	ENSG00000111266
chr14	55271128	55271144	CREM	MA0609.2	FBXO34	ENSG00000178974
chr14	55271344	55271360	CREM	MA0609.2	FBXO34	ENSG00000178974
chr14	76768365	76768381	CREM	MA0609.2	VASH1	ENSG00000071246
chr16	27367778	27367794	CREM	MA0609.2	IL4R	ENSG00000077238
chr16	27401968	27401984	CREM	MA0609.2	IL21R	ENSG00000103522
chr16	68756448	68756464	CREM	MA0609.2	CDH1	ENSG00000039068
chr17	43212080	43212096	CREM	MA0609.2	TMEM106A	ENSG00000184988
chr18	3594047	3594063	CREM	MA0609.2	DLGAP1-AS1	ENSG00000177337
chr19	10416732	10416748	CREM	MA0609.2	PDE4A	ENSG00000065989
chr19	10416765	10416781	CREM	MA0609.2	PDE4A	ENSG00000065989
chr19	45001351	45001367	CREM	MA0609.2	RELB	ENSG00000104856
chr19	46634128	46634144	CREM	MA0609.2	GNG8	ENSG00000167414
chr19	54463613	54463629	CREM	MA0609.2	LENG9	ENSG00000275183
chr2	191678073	191678089	CREM	MA0609.2	NABP1	ENSG00000173559
chr2	218880440	218880456	CREM	MA0609.2	WNT10A	ENSG00000135925
chr20	34704278	34704294	CREM	MA0609.2	TP53INP2	ENSG00000078804
chr20	34704684	34704700	CREM	MA0609.2	TP53INP2	ENSG00000078804
chr20	36501814	36501830	CREM	MA0609.2	DLGAP4	ENSG00000080845
chr3	8501635	8501651	CREM	MA0609.2	LMCD1	ENSG00000071282
chr3	9249680	9249696	CREM	MA0609.2	SRGAP3	ENSG00000196220
chr3	183285961	183285977	CREM	MA0609.2	B3GNT5	ENSG00000176597
chr3	183286019	183286035	CREM	MA0609.2	B3GNT5	ENSG00000176597
chr3	187745760	187745776	CREM	MA0609.2	BCL6	ENSG00000113916
chr4	10671575	10671591	CREM	MA0609.2	CLNK	ENSG00000109684
chr4	121139829	121139845	CREM	MA0609.2	TNIP3	ENSG00000050730
chr4	139555285	139555301	CREM	MA0609.2	SETD7	ENSG00000145391
chr4	144646076	144646092	CREM	MA0609.2	HHIP	ENSG00000164161
chr5	150411486	150411502	CREM	MA0609.2	CD74	ENSG00000019582
chr5	170312882	170312898	CREM	MA0609.2		ENSG00000250274
chr6	144063867	144063883	CREM	MA0609.2	PLAGL1	ENSG00000118495
chr7	39733365	39733381	CREM	MA0609.2	LINC00265	ENSG00000188185
chr7	104944549	104944565	CREM	MA0609.2		ENSG00000237513
chr7	138002253	138002269	CREM	MA0609.2	CREB3L2	ENSG00000182158
chr8	37882049	37882065	CREM	MA0609.2	RAB11FIP1	ENSG00000156675
chr8	37892032	37892048	CREM	MA0609.2	RAB11FIP1	ENSG00000156675
chr8	80864798	80864814	CREM	MA0609.2	ZNF704	ENSG00000164684
chr8	97775733	97775749	CREM	MA0609.2	LAPTM4B	ENSG00000104341
chr9	96450014	96450030	CREM	MA0609.2	HABP4	ENSG00000130956
chr9	114505568	114505584	CREM	MA0609.2	WHRN	ENSG00000095397
chr9	120931661	120931677	CREM	MA0609.2	TRAF1	ENSG00000056558
chr1	3491388	3491407	CTCF	MA0139.1	MEGF6	ENSG00000162591
chr1	11642598	11642617	CTCF	MA0139.1	FBXO2	ENSG00000116661
chr1	11645851	11645870	CTCF	MA0139.1	FBXO2	ENSG00000116661
chr1	18907109	18907128	CTCF	MA0139.1	ALDH4A1	ENSG00000159423
chr1	26789335	26789354	CTCF	MA0139.1	PIGV	ENSG00000060642
chr1	37477303	37477322	CTCF	MA0139.1	ZC3H12A	ENSG00000163874
chr1	40315456	40315475	CTCF	MA0139.1	COL9A2	ENSG00000049089
chr1	63773924	63773943	CTCF	MA0139.1	ROR1	ENSG00000185483
chr1	67685189	67685208	CTCF	MA0139.1	GADD45A	ENSG00000116717
chr1	76154295	76154314	CTCF	MA0139.1	ST6GALNAC3	ENSG00000184005
chr1	155859400	155859419	CTCF	MA0139.1	SYT11	ENSG00000132718
chr1	156090877	156090896	CTCF	MA0139.1	LMNA	ENSG00000160789
chr1	156096779	156096798	CTCF	MA0139.1	LMNA	ENSG00000160789
chr1	156097379	156097398	CTCF	MA0139.1	LMNA	ENSG00000160789
chr1	156839063	156839082	CTCF	MA0139.1	NTRK1	ENSG00000198400
chr1	165914363	165914382	CTCF	MA0139.1	UCK2	ENSG00000143179
chr1	169106253	169106272	CTCF	MA0139.1	ATP1B1	ENSG00000143153
chr1	181090215	181090234	CTCF	MA0139.1	IER5	ENSG00000162783
chr1	185318062	185318081	CTCF	MA0139.1	IVNS1ABP	ENSG00000116679
chr1	205256340	205256359	CTCF	MA0139.1	TMCC2	ENSG00000133069
chr1	205273632	205273651	CTCF	MA0139.1	TMCC2	ENSG00000133069
chr1	205284821	205284840	CTCF	MA0139.1	TMCC2	ENSG00000133069
chr1	223123883	223123902	CTCF	MA0139.1	TLR5	ENSG00000187554
chr1	223133834	223133853	CTCF	MA0139.1	TLR5	ENSG00000187554
chr1	229558939	229558958	CTCF	MA0139.1	ABCB10	ENSG00000135776
chr1	245153156	245153175	CTCF	MA0139.1	KIF26B	ENSG00000162849
chr10	91389797	91389816	CTCF	MA0139.1	HECTD2	ENSG00000165338
chr10	96832186	96832205	CTCF	MA0139.1	LCOR	ENSG00000196233
chr10	97037523	97037542	CTCF	MA0139.1	SLIT1	ENSG00000187122
chr10	100010068	100010087	CTCF	MA0139.1	DNMBP	ENSG00000107554
chr10	102394066	102394085	CTCF	MA0139.1	NFKB2	ENSG00000077150
chr10	102399677	102399696	CTCF	MA0139.1	NFKB2	ENSG00000077150
chr10	102420740	102420759	CTCF	MA0139.1	PSD	ENSG00000059915
chr10	102421119	102421138	CTCF	MA0139.1	PSD	ENSG00000059915
chr10	110497778	110497797	CTCF	MA0139.1	DUSP5	ENSG00000138166
chr10	114304926	114304945	CTCF	MA0139.1	AFAP1L2	ENSG00000169129
chr11	723430	723449	CTCF	MA0139.1	EPS8L2	ENSG00000177106
chr11	2305502	2305521	CTCF	MA0139.1	TSPAN32	ENSG00000064201
chr11	45103283	45103302	CTCF	MA0139.1	PRDM11	ENSG00000019485
chr11	62551984	62552003	CTCF	MA0139.1	AHNAK	ENSG00000124942
chr11	62556554	62556573	CTCF	MA0139.1	AHNAK	ENSG00000124942
chr11	63768348	63768367	CTCF	MA0139.1	C11orf95	ENSG00000188070
chr11	65416490	65416509	CTCF	MA0139.1	NEAT1	ENSG00000245532
chr11	65416521	65416540	CTCF	MA0139.1	NEAT1	ENSG00000245532
chr11	65425358	65425377	CTCF	MA0139.1	NEAT1	ENSG00000245532
chr11	77127292	77127311	CTCF	MA0139.1	MYO7A	ENSG00000137474
chr11	95151677	95151696	CTCF	MA0139.1		ENSG00000245552
chr11	117947083	117947102	CTCF	MA0139.1	TMPRSS13	ENSG00000137747
chr11	117987465	117987484	CTCF	MA0139.1	IL10RA	ENSG00000110324
chr11	119315662	119315681	CTCF	MA0139.1	MCAM	ENSG00000076706
chr11	130069765	130069784	CTCF	MA0139.1	APLP2	ENSG00000084234
chr12	6779089	6779108	CTCF	MA0139.1	LAG3	ENSG00000089692
chr12	40107708	40107727	CTCF	MA0139.1	SLC2A13	ENSG00000151229
chr12	47905250	47905269	CTCF	MA0139.1	VDR	ENSG00000111424
chr12	76031647	76031666	CTCF	MA0139.1	PHLDA1	ENSG00000139289
chr12	110698422	110698441	CTCF	MA0139.1	HVCN1	ENSG00000122986
chr12	113135845	113135864	CTCF	MA0139.1	RASAL1	ENSG00000111344
chr12	113136293	113136312	CTCF	MA0139.1	RASAL1	ENSG00000111344
chr12	123075759	123075778	CTCF	MA0139.1	PITPNM2	ENSG00000090975
chr13	75326809	75326828	CTCF	MA0139.1	TBC1D4	ENSG00000136111
chr14	24090696	24090715	CTCF	MA0139.1	PCK2	ENSG00000100889
chr14	51651654	51651673	CTCF	MA0139.1	FRMD6	ENSG00000139926
chr14	51652069	51652088	CTCF	MA0139.1	FRMD6	ENSG00000139926
chr14	55271207	55271226	CTCF	MA0139.1	FBXO34	ENSG00000178974
chr14	55271274	55271293	CTCF	MA0139.1	FBXO34	ENSG00000178974
chr14	55354795	55354814	CTCF	MA0139.1	FBXO34	ENSG00000178974
chr14	63728238	63728257	CTCF	MA0139.1	SGPP1	ENSG00000126821
chr15	40857820	40857839	CTCF	MA0139.1	SPINT1	ENSG00000166145
chr15	40859305	40859324	CTCF	MA0139.1	SPINT1	ENSG00000166145
chr15	74438888	74438907	CTCF	MA0139.1	SEMA7A	ENSG00000138623
chr15	91853286	91853305	CTCF	MA0139.1	SLCO3A1	ENSG00000176463
chr16	8674482	8674501	CTCF	MA0139.1	ABAT	ENSG00000183044
chr16	27368301	27368320	CTCF	MA0139.1	IL4R	ENSG00000077238
chr16	88443178	88443197	CTCF	MA0139.1	ZFPM1	ENSG00000179588
chr16	88456218	88456237	CTCF	MA0139.1	ZFPM1	ENSG00000179588
chr16	88456295	88456314	CTCF	MA0139.1	ZFPM1	ENSG00000179588
chr17	1629200	1629219	CTCF	MA0139.1	SLC43A2	ENSG00000167703
chr17	2786445	2786464	CTCF	MA0139.1		ENSG00000132359
chr17	3683148	3683167	CTCF	MA0139.1	P2RX5	ENSG00000083454
chr17	16453399	16453418	CTCF	MA0139.1	LRRC75A	ENSG00000181350
chr17	45316946	45316965	CTCF	MA0139.1	MAP3K14	ENSG00000006062
chr17	50200662	50200681	CTCF	MA0139.1	COL1A1	ENSG00000108821
chr17	58417665	58417684	CTCF	MA0139.1	RNF43	ENSG00000108375
chr17	68259289	68259308	CTCF	MA0139.1	ARSG	ENSG00000141337
chr17	68436566	68436585	CTCF	MA0139.1	WIPI1	ENSG00000070540
chr17	68463157	68463176	CTCF	MA0139.1	WIPI1	ENSG00000070540
chr17	75131520	75131539	CTCF	MA0139.1	NT5C	ENSG00000125458
chr18	3594416	3594435	CTCF	MA0139.1	DLGAP1-AS1	ENSG00000177337
chr19	2097038	2097057	CTCF	MA0139.1	IZUMO4	ENSG00000099840
chr19	2474709	2474728	CTCF	MA0139.1	GADD45B	ENSG00000099860
chr19	2475485	2475504	CTCF	MA0139.1	GADD45B	ENSG00000099860
chr19	10096079	10096098	CTCF	MA0139.1	ANGPTL6	ENSG00000130812
chr19	10416655	10416674	CTCF	MA0139.1	PDE4A	ENSG00000065989
chr19	10416824	10416843	CTCF	MA0139.1	PDE4A	ENSG00000065989
chr19	10417043	10417062	CTCF	MA0139.1	PDE4A	ENSG00000065989
chr19	11346214	11346233	CTCF	MA0139.1	CCDC159	ENSG00000183401
chr19	42108662	42108681	CTCF	MA0139.1	POU2F2	ENSG00000028277
chr2	26503570	26503589	CTCF	MA0139.1	OTOF	ENSG00000115155
chr2	46987174	46987193	CTCF	MA0139.1	TTC7A	ENSG00000068724
chr2	46987238	46987257	CTCF	MA0139.1	TTC7A	ENSG00000068724
chr2	60881001	60881020	CTCF	MA0139.1	REL	ENSG00000162924
chr2	60881681	60881700	CTCF	MA0139.1	REL	ENSG00000162924
chr2	62196451	62196470	CTCF	MA0139.1	B3GNT2	ENSG00000170340
chr2	74198537	74198556	CTCF	MA0139.1	MTHFD2	ENSG00000065911
chr2	96142413	96142432	CTCF	MA0139.1	DUSP2	ENSG00000158050
chr2	99559253	99559272	CTCF	MA0139.1	AFF3	ENSG00000144218
chr2	166375746	166375765	CTCF	MA0139.1	SCN9A	ENSG00000169432
chr2	178523082	178523101	CTCF	MA0139.1	TTN-AS1	ENSG00000237298
chr2	201116657	201116676	CTCF	MA0139.1	CFLAR	ENSG00000003402
chr2	201118670	201118689	CTCF	MA0139.1	CFLAR	ENSG00000003402
chr2	218892758	218892777	CTCF	MA0139.1	WNT10A	ENSG00000135925
chr2	218896994	218897013	CTCF	MA0139.1	WNT10A	ENSG00000135925
chr2	218898398	218898417	CTCF	MA0139.1	WNT10A	ENSG00000135925
chr2	240565928	240565947	CTCF	MA0139.1	RNPEPL1	ENSG00000142327
chr2	240566517	240566536	CTCF	MA0139.1	RNPEPL1	ENSG00000142327
chr20	354637	354656	CTCF	MA0139.1	NRSN2	ENSG00000125841
chr20	25294611	25294630	CTCF	MA0139.1	PYGB	ENSG00000100994
chr20	31722941	31722960	CTCF	MA0139.1	BCL2L1	ENSG00000171552
chr20	31724030	31724049	CTCF	MA0139.1	BCL2L1	ENSG00000171552
chr20	34704245	34704264	CTCF	MA0139.1	TP53INP2	ENSG00000078804
chr20	36461512	36461531	CTCF	MA0139.1	DLGAP4	ENSG00000080845
chr20	43749918	43749937	CTCF	MA0139.1	GTSF1L	ENSG00000124196
chr20	43751481	43751500	CTCF	MA0139.1	GTSF1L	ENSG00000124196
chr20	57619555	57619574	CTCF	MA0139.1	ZBP1	ENSG00000124256
chr22	17830153	17830172	CTCF	MA0139.1	MICAL3	ENSG00000243156
chr22	36856507	36856526	CTCF	MA0139.1	NCF4	ENSG00000100365
chr22	41941449	41941468	CTCF	MA0139.1	CENPM	ENSG00000100162
chr22	44684907	44684926	CTCF	MA0139.1	PRR5	ENSG00000186654
chr3	14432148	14432167	CTCF	MA0139.1	SLC6A6	ENSG00000131389
chr3	14432421	14432440	CTCF	MA0139.1	SLC6A6	ENSG00000131389
chr3	28667836	28667855	CTCF	MA0139.1	RBMS3	ENSG00000144642
chr3	48656242	48656261	CTCF	MA0139.1	CELSR3	ENSG00000008300
chr3	56802296	56802315	CTCF	MA0139.1	ARHGEF3	ENSG00000163947
chr3	66407931	66407950	CTCF	MA0139.1	LRIG1	ENSG00000144749
chr3	72100774	72100793	CTCF	MA0139.1	LINC00877	ENSG00000241163
chr3	101849108	101849127	CTCF	MA0139.1	NFKBIZ	ENSG00000144802
chr3	105368775	105368794	CTCF	MA0139.1	ALCAM	ENSG00000170017
chr3	113947812	113947831	CTCF	MA0139.1	ZDHHC23	ENSG00000184307
chr3	114291019	114291038	CTCF	MA0139.1	TIGIT	ENSG00000181847
chr3	130893066	130893085	CTCF	MA0139.1	ATP2C1	ENSG00000017260
chr3	143120212	143120231	CTCF	MA0139.1	CHST2	ENSG00000175040
chr3	143121445	143121464	CTCF	MA0139.1	CHST2	ENSG00000175040
chr3	143121525	143121544	CTCF	MA0139.1	CHST2	ENSG00000175040
chr3	151086851	151086870	CTCF	MA0139.1	MED12L	ENSG00000144893
chr3	183429023	183429042	CTCF	MA0139.1	MCF2L2	ENSG00000053524
chr3	187740101	187740120	CTCF	MA0139.1	BCL6	ENSG00000113916
chr3	187745682	187745701	CTCF	MA0139.1	BCL6	ENSG00000113916
chr3	187748156	187748175	CTCF	MA0139.1	BCL6	ENSG00000113916
chr4	1009734	1009753	CTCF	MA0139.1	FGFRL1	ENSG00000127418
chr4	1009942	1009961	CTCF	MA0139.1	FGFRL1	ENSG00000127418
chr4	1011144	1011163	CTCF	MA0139.1	FGFRL1	ENSG00000127418
chr4	1810092	1810111	CTCF	MA0139.1	FGFR3	ENSG00000068078
chr4	8228762	8228781	CTCF	MA0139.1	SH3TC1	ENSG00000125089
chr4	8242348	8242367	CTCF	MA0139.1	SH3TC1	ENSG00000125089
chr4	80184227	80184246	CTCF	MA0139.1	PRDM8	ENSG00000152784
chr4	155758846	155758865	CTCF	MA0139.1	GUCY1B1	ENSG00000061918
chr5	10564175	10564194	CTCF	MA0139.1	ANKRD33B	ENSG00000164236
chr5	139392734	139392753	CTCF	MA0139.1	MZB1	ENSG00000170476
chr5	148731094	148731113	CTCF	MA0139.1	HTR4	ENSG00000164270
chr5	148731169	148731188	CTCF	MA0139.1	HTR4	ENSG00000164270
chr5	151758704	151758723	CTCF	MA0139.1	ATOX1	ENSG00000177556
chr5	177501136	177501155	CTCF	MA0139.1	PDLIM7	ENSG00000196923
chr6	20404743	20404762	CTCF	MA0139.1	E2F3	ENSG00000112242
chr6	31492094	31492113	CTCF	MA0139.1	MICB	ENSG00000204516
chr6	31598745	31598764	CTCF	MA0139.1	NCR3	ENSG00000204475
chr6	37692181	37692200	CTCF	MA0139.1	MDGA1	ENSG00000112139
chr6	39229661	39229680	CTCF	MA0139.1	KCNK5	ENSG00000164626
chr6	43229476	43229495	CTCF	MA0139.1	DNPH1	ENSG00000112667
chr6	44265031	44265050	CTCF	MA0139.1	NFKBIE	ENSG00000146232
chr6	52416715	52416734	CTCF	MA0139.1	EFHC1	ENSG00000096093
chr6	52420221	52420240	CTCF	MA0139.1	EFHC1	ENSG00000096093
chr6	89432989	89433008	CTCF	MA0139.1	ANKRD6	ENSG00000135299
chr6	89433077	89433096	CTCF	MA0139.1	ANKRD6	ENSG00000135299
chr6	110180085	110180104	CTCF	MA0139.1	WASF1	ENSG00000112290
chr6	131628397	131628416	CTCF	MA0139.1	ENPP3	ENSG00000154269
chr6	136792845	136792864	CTCF	MA0139.1	MAP3K5	ENSG00000197442
chr6	144064119	144064138	CTCF	MA0139.1	PLAGL1	ENSG00000118495
chr6	144151373	144151392	CTCF	MA0139.1	STX11	ENSG00000135604
chr6	149432167	149432186	CTCF	MA0139.1	ZC3H12D	ENSG00000178199
chr6	149484900	149484919	CTCF	MA0139.1	ZC3H12D	ENSG00000178199
chr6	149484951	149484970	CTCF	MA0139.1	ZC3H12D	ENSG00000178199
chr7	2403544	2403563	CTCF	MA0139.1	CHST12	ENSG00000136213
chr7	48110335	48110354	CTCF	MA0139.1	UPP1	ENSG00000183696
chr7	116526249	116526268	CTCF	MA0139.1	CAV1	ENSG00000105974
chr7	130961332	130961351	CTCF	MA0139.1	LINC-PINT	ENSG00000231721
chr7	138002318	138002337	CTCF	MA0139.1	CREB3L2	ENSG00000182158
chr7	138002483	138002502	CTCF	MA0139.1	CREB3L2	ENSG00000182158
chr8	27465769	27465788	CTCF	MA0139.1	CHRNA2	ENSG00000120903
chr8	140637542	140637561	CTCF	MA0139.1	ERICD	ENSG00000280303
chr9	89603158	89603177	CTCF	MA0139.1	GADD45G	ENSG00000130222
chr9	89743772	89743791	CTCF	MA0139.1		ENSG00000237372
chr9	121744507	121744526	CTCF	MA0139.1	DAB2IP	ENSG00000136848
chr9	129488792	129488811	CTCF	MA0139.1	LINC00963	ENSG00000204054
chr9	132236555	132236574	CTCF	MA0139.1	NTNG2	ENSG00000196358
chr9	136842539	136842558	CTCF	MA0139.1	AJM1	ENSG00000232434
chr9	136843950	136843969	CTCF	MA0139.1	AJM1	ENSG00000232434
chr9	137028358	137028377	CTCF	MA0139.1	ABCA2	ENSG00000107331
chr9	137029530	137029549	CTCF	MA0139.1	ABCA2	ENSG00000107331
chr9	137046696	137046715	CTCF	MA0139.1	NPDC1	ENSG00000107281
chrX	30652983	30653002	CTCF	MA0139.1	GK	ENSG00000198814
chrX	46759444	46759463	CTCF	MA0139.1	SLC9A7	ENSG00000065923
chrX	48917258	48917277	CTCF	MA0139.1	PIM2	ENSG00000102096
chrX	48917395	48917414	CTCF	MA0139.1	PIM2	ENSG00000102096
chrX	49200290	49200309	CTCF	MA0139.1	SYP	ENSG00000102003
chrX	130060669	130060688	CTCF	MA0139.1	ELF4	ENSG00000102034
chrX	130092424	130092443	CTCF	MA0139.1	ELF4	ENSG00000102034
chrX	130903247	130903266	CTCF	MA0139.1	ENOX2	ENSG00000165675
chrX	154369090	154369109	CTCF	MA0139.1	FLNA	ENSG00000196924
chr10	79446013	79446023	CUX1	MA0754.1	ZCCHC24	ENSG00000165424
chr21	33231706	33231716	CUX1	MA0754.1	IFNAR2	ENSG00000159110
chr9	136882875	136882885	CUX1	MA0754.1	TRAF2	ENSG00000127191
chrX	48919085	48919095	CUX1	MA0754.1	PIM2	ENSG00000102096
chr1	156097163	156097173	CUX2	MA0755.1	LMNA	ENSG00000160789
chr10	79446013	79446023	CUX2	MA0755.1	ZCCHC24	ENSG00000165424
chr21	33231706	33231716	CUX2	MA0755.1	IFNAR2	ENSG00000159110
chr9	136882875	136882885	CUX2	MA0755.1	TRAF2	ENSG00000127191
chrX	48919085	48919095	CUX2	MA0755.1	PIM2	ENSG00000102096
chr1	18902720	18902732	DBP	MA0639.1	ALDH4A1	ENSG00000159423
chr11	65426450	65426462	DBP	MA0639.1	NEAT1	ENSG00000245532
chr12	12561194	12561206	DBP	MA0639.1	DUSP16	ENSG00000111266
chr12	123115633	123115645	DBP	MA0639.1	PITPNM2	ENSG00000090975
chr12	123115815	123115827	DBP	MA0639.1	PITPNM2	ENSG00000090975
chr13	30371783	30371795	DBP	MA0639.1	LINC00426	ENSG00000238121
chr14	35404099	35404111	DBP	MA0639.1	NFKBIA	ENSG00000100906
chr14	75566479	75566491	DBP	MA0639.1	FLVCR2	ENSG00000119686
chr19	17539852	17539864	DBP	MA0639.1	NIBAN3	ENSG00000167483
chr21	15065939	15065951	DBP	MA0639.1	NRIP1	ENSG00000180530
chr3	101851255	101851267	DBP	MA0639.1	NFKBIZ	ENSG00000144802
chr3	187745829	187745841	DBP	MA0639.1	BCL6	ENSG00000113916
chr4	139555143	139555155	DBP	MA0639.1	SETD7	ENSG00000145391
chr6	16685530	16685542	DBP	MA0639.1	ATXN1	ENSG00000124788
chr7	131108118	131108130	DBP	MA0639.1	LINC-PINT	ENSG00000231721
chr8	12754123	12754135	DBP	MA0639.1	LONRF1	ENSG00000154359
chr8	12754148	12754160	DBP	MA0639.1	LONRF1	ENSG00000154359
chr8	27491676	27491688	DBP	MA0639.1	EPHX2	ENSG00000120915
chr10	96832369	96832381	E2F1	MA0024.3	LCOR	ENSG00000196233
chr11	45103281	45103293	E2F1	MA0024.3	PRDM11	ENSG00000019485
chr12	104958838	104958850	E2F1	MA0024.3	SLC41A2	ENSG00000136052
chr19	11346447	11346459	E2F1	MA0024.3	CCDC159	ENSG00000183401
chr22	41946928	41946940	E2F1	MA0024.3	CENPM	ENSG00000100162
chr3	196082282	196082294	E2F1	MA0024.3	TFRC	ENSG00000072274
chr4	80183740	80183752	E2F1	MA0024.3	PRDM8	ENSG00000152784
chr6	20401853	20401865	E2F1	MA0024.3	E2F3	ENSG00000112242
chr6	144150269	144150281	E2F1	MA0024.3	STX11	ENSG00000135604
chr6	144151568	144151580	E2F1	MA0024.3	STX11	ENSG00000135604
chr7	2403417	2403429	E2F1	MA0024.3	CHST12	ENSG00000136213
chr1	26788584	26788600	E2F2	MA0864.2	PIGV	ENSG00000060642
chr1	185317526	185317542	E2F2	MA0864.2	IVNS1ABP	ENSG00000116679
chr10	96832367	96832383	E2F2	MA0864.2	LCOR	ENSG00000196233
chr11	45103279	45103295	E2F2	MA0864.2	PRDM11	ENSG00000019485
chr11	117947079	117947095	E2F2	MA0864.2	TMPRSS13	ENSG00000137747
chr12	104958836	104958852	E2F2	MA0864.2	SLC41A2	ENSG00000136052
chr14	24171762	24171778	E2F2	MA0864.2	REC8	ENSG00000100918
chr19	2097333	2097349	E2F2	MA0864.2	IZUMO4	ENSG00000099840
chr19	11346445	11346461	E2F2	MA0864.2	CCDC159	ENSG00000183401
chr19	42108669	42108685	E2F2	MA0864.2	POU2F2	ENSG00000028277
chr2	178523127	178523143	E2F2	MA0864.2	TTN-AS1	ENSG00000237298
chr3	196082280	196082296	E2F2	MA0864.2	TFRC	ENSG00000072274
chr4	80183738	80183754	E2F2	MA0864.2	PRDM8	ENSG00000152784
chr4	80184234	80184250	E2F2	MA0864.2	PRDM8	ENSG00000152784
chr6	20401851	20401867	E2F2	MA0864.2	E2F3	ENSG00000112242
chr7	2403415	2403431	E2F2	MA0864.2	CHST12	ENSG00000136213
chr2	178523127	178523143	E2F3	MA0469.3	TTN-AS1	ENSG00000237298
chr8	124644164	124644180	E2F3	MA0469.3	MTSS1	ENSG00000170873
chr9	120931575	120931591	E2F3	MA0469.3	TRAF1	ENSG00000056558
chr1	185317527	185317541	E2F4	MA0470.2	IVNS1ABP	ENSG00000116679
chr10	79446180	79446194	E2F4	MA0470.2	ZCCHC24	ENSG00000165424
chr10	96832368	96832382	E2F4	MA0470.2	LCOR	ENSG00000196233
chr11	45103280	45103294	E2F4	MA0470.2	PRDM11	ENSG00000019485
chr11	117947080	117947094	E2F4	MA0470.2	TMPRSS13	ENSG00000137747
chr14	24171763	24171777	E2F4	MA0470.2	REC8	ENSG00000100918
chr19	2097334	2097348	E2F4	MA0470.2	IZUMO4	ENSG00000099840
chr19	11346446	11346460	E2F4	MA0470.2	CCDC159	ENSG00000183401
chr19	42108670	42108684	E2F4	MA0470.2	POU2F2	ENSG00000028277
chr2	178523128	178523142	E2F4	MA0470.2	TTN-AS1	ENSG00000237298
chr3	101827963	101827977	E2F4	MA0470.2	NFKBIZ	ENSG00000144802
chr3	196082281	196082295	E2F4	MA0470.2	TFRC	ENSG00000072274
chr4	173369916	173369930	E2F4	MA0470.2	SAP30-DT	ENSG00000272870
chr6	144064212	144064226	E2F4	MA0470.2	PLAGL1	ENSG00000118495
chr6	150600913	150600927	E2F4	MA0470.2	PLEKHG1	ENSG00000120278
chr7	2403416	2403430	E2F4	MA0470.2	CHST12	ENSG00000136213
chr1	1201683	1201696	E2F6	MA0471.2	TNFRSF18	ENSG00000186891
chr1	3531450	3531463	E2F6	MA0471.2	MEGF6	ENSG00000162591
chr1	8026368	8026381	E2F6	MA0471.2	ERRFI1	ENSG00000116285
chr1	18902474	18902487	E2F6	MA0471.2	ALDH4A1	ENSG00000159423
chr1	24745030	24745043	E2F6	MA0471.2	CLIC4	ENSG00000169504
chr1	26787802	26787815	E2F6	MA0471.2	PIGV	ENSG00000060642
chr1	26787917	26787930	E2F6	MA0471.2	PIGV	ENSG00000060642
chr1	26788065	26788078	E2F6	MA0471.2	PIGV	ENSG00000060642
chr1	26788177	26788190	E2F6	MA0471.2	PIGV	ENSG00000060642
chr1	40315556	40315569	E2F6	MA0471.2	COL9A2	ENSG00000049089
chr1	40316694	40316707	E2F6	MA0471.2	COL9A2	ENSG00000049089
chr1	67685290	67685303	E2F6	MA0471.2	GADD45A	ENSG00000116717
chr1	76074507	76074520	E2F6	MA0471.2	ST6GALNAC3	ENSG00000184005
chr1	92785236	92785249	E2F6	MA0471.2	EVI5	ENSG00000067208
chr1	94927210	94927223	E2F6	MA0471.2	CNN3	ENSG00000117519
chr1	116570435	116570448	E2F6	MA0471.2	CD58	ENSG00000116815
chr1	117605824	117605837	E2F6	MA0471.2	TENT5C	ENSG00000183508
chr1	117605988	117606001	E2F6	MA0471.2	TENT5C	ENSG00000183508
chr1	117606036	117606049	E2F6	MA0471.2	TENT5C	ENSG00000183508
chr1	148952113	148952126	E2F6	MA0471.2	PDE4DIP	ENSG00000178104
chr1	153545158	153545171	E2F6	MA0471.2	S100A4	ENSG00000196154
chr1	156104305	156104318	E2F6	MA0471.2	LMNA	ENSG00000160789
chr1	156106509	156106522	E2F6	MA0471.2	LMNA	ENSG00000160789
chr1	156127212	156127225	E2F6	MA0471.2	LMNA	ENSG00000160789
chr1	169105787	169105800	E2F6	MA0471.2	ATP1B1	ENSG00000143153
chr1	169106334	169106347	E2F6	MA0471.2	ATP1B1	ENSG00000143153
chr1	181088840	181088853	E2F6	MA0471.2	IER5	ENSG00000162783
chr1	181089948	181089961	E2F6	MA0471.2	IER5	ENSG00000162783
chr1	181090289	181090302	E2F6	MA0471.2	IER5	ENSG00000162783
chr1	181105228	181105241	E2F6	MA0471.2	IER5	ENSG00000162783
chr1	184974035	184974048	E2F6	MA0471.2	NIBAN1	ENSG00000135842
chr1	185316326	185316339	E2F6	MA0471.2	IVNS1ABP	ENSG00000116679
chr1	185316373	185316386	E2F6	MA0471.2	IVNS1ABP	ENSG00000116679
chr1	185316579	185316592	E2F6	MA0471.2	IVNS1ABP	ENSG00000116679
chr1	202348704	202348717	E2F6	MA0471.2	PPP1R12B	ENSG00000077157
chr1	205227904	205227917	E2F6	MA0471.2	TMCC2	ENSG00000133069
chr1	235866581	235866594	E2F6	MA0471.2	LYST	ENSG00000143669
chr1	235866975	235866988	E2F6	MA0471.2	LYST	ENSG00000143669
chr10	79445528	79445541	E2F6	MA0471.2	ZCCHC24	ENSG00000165424
chr10	97292661	97292674	E2F6	MA0471.2	ARHGAP19	ENSG00000213390
chr10	97292825	97292838	E2F6	MA0471.2	ARHGAP19	ENSG00000213390
chr10	102394339	102394352	E2F6	MA0471.2	NFKB2	ENSG00000077150
chr10	102394503	102394516	E2F6	MA0471.2	NFKB2	ENSG00000077150
chr10	102395595	102395608	E2F6	MA0471.2	NFKB2	ENSG00000077150
chr10	102395706	102395719	E2F6	MA0471.2	NFKB2	ENSG00000077150
chr10	102399667	102399680	E2F6	MA0471.2	NFKB2	ENSG00000077150
chr10	102399755	102399768	E2F6	MA0471.2	NFKB2	ENSG00000077150
chr10	102409331	102409344	E2F6	MA0471.2	PSD	ENSG00000059915
chr10	110497810	110497823	E2F6	MA0471.2	DUSP5	ENSG00000138166
chr10	126042219	126042232	E2F6	MA0471.2	ADAM12	ENSG00000148848
chr10	133378410	133378423	E2F6	MA0471.2	PAOX	ENSG00000148832
chr10	133378433	133378446	E2F6	MA0471.2	PAOX	ENSG00000148832
chr11	44950985	44950998	E2F6	MA0471.2	TP53I11	ENSG00000175274
chr11	44951000	44951013	E2F6	MA0471.2	TP53I11	ENSG00000175274
chr11	45102997	45103010	E2F6	MA0471.2	PRDM11	ENSG00000019485
chr11	62555551	62555564	E2F6	MA0471.2	AHNAK	ENSG00000124942
chr11	78417981	78417994	E2F6	MA0471.2	GAB2	ENSG00000033327
chr11	130069299	130069312	E2F6	MA0471.2	APLP2	ENSG00000084234
chr12	8914622	8914635	E2F6	MA0471.2	PHC1	ENSG00000111752
chr12	40105882	40105895	E2F6	MA0471.2	SLC2A13	ENSG00000151229
chr12	40106075	40106088	E2F6	MA0471.2	SLC2A13	ENSG00000151229
chr12	40106138	40106151	E2F6	MA0471.2	SLC2A13	ENSG00000151229
chr12	62192379	62192392	E2F6	MA0471.2	TAFA2	ENSG00000198673
chr12	104456889	104456902	E2F6	MA0471.2	CHST11	ENSG00000171310
chr12	104958320	104958333	E2F6	MA0471.2	SLC41A2	ENSG00000136052
chr12	113135766	113135779	E2F6	MA0471.2	RASAL1	ENSG00000111344
chr12	123076110	123076123	E2F6	MA0471.2	PITPNM2	ENSG00000090975
chr12	123115511	123115524	E2F6	MA0471.2	PITPNM2	ENSG00000090975
chr12	123115880	123115893	E2F6	MA0471.2	PITPNM2	ENSG00000090975
chr13	30394844	30394857	E2F6	MA0471.2	LINC00426	ENSG00000238121
chr13	42040599	42040612	E2F6	MA0471.2	DGKH	ENSG00000102780
chr13	42040686	42040699	E2F6	MA0471.2	DGKH	ENSG00000102780
chr13	43879632	43879645	E2F6	MA0471.2	CCDC122	ENSG00000151773
chr13	75482194	75482207	E2F6	MA0471.2	TBC1D4	ENSG00000136111
chr14	24094290	24094303	E2F6	MA0471.2	PCK2	ENSG00000100889
chr14	24094335	24094348	E2F6	MA0471.2	PCK2	ENSG00000100889
chr14	35404019	35404032	E2F6	MA0471.2	NFKBIA	ENSG00000100906
chr14	35404086	35404099	E2F6	MA0471.2	NFKBIA	ENSG00000100906
chr14	35404369	35404382	E2F6	MA0471.2	NFKBIA	ENSG00000100906
chr14	35404720	35404733	E2F6	MA0471.2	NFKBIA	ENSG00000100906
chr14	35416433	35416446	E2F6	MA0471.2	NFKBIA	ENSG00000100906
chr14	35417057	35417070	E2F6	MA0471.2	NFKBIA	ENSG00000100906
chr14	55271259	55271272	E2F6	MA0471.2	FBXO34	ENSG00000178974
chr14	55271454	55271467	E2F6	MA0471.2	FBXO34	ENSG00000178974
chr14	75542944	75542957	E2F6	MA0471.2	BATF	ENSG00000156127
chr14	100306695	100306708	E2F6	MA0471.2	SLC25A29	ENSG00000197119
chr15	91853311	91853324	E2F6	MA0471.2	SLCO3A1	ENSG00000176463
chr16	11743002	11743015	E2F6	MA0471.2	TXNDC11	ENSG00000153066
chr16	27402132	27402145	E2F6	MA0471.2	IL21R	ENSG00000103522
chr16	30472668	30472681	E2F6	MA0471.2	ITGAL	ENSG00000005844
chr16	68448816	68448829	E2F6	MA0471.2	SMPD3	ENSG00000103056
chr16	81779137	81779150	E2F6	MA0471.2	PLCG2	ENSG00000197943
chr16	88452989	88453002	E2F6	MA0471.2	ZFPM1	ENSG00000179588
chr16	88453222	88453235	E2F6	MA0471.2	ZFPM1	ENSG00000179588
chr16	88456930	88456943	E2F6	MA0471.2	ZFPM1	ENSG00000179588
chr17	1491373	1491386	E2F6	MA0471.2	MYO1C	ENSG00000197879
chr17	1628346	1628359	E2F6	MA0471.2	SLC43A2	ENSG00000167703
chr17	2786518	2786531	E2F6	MA0471.2		ENSG00000132359
chr17	3683215	3683228	E2F6	MA0471.2	P2RX5	ENSG00000083454
chr17	14300604	14300617	E2F6	MA0471.2	HS3ST3B1	ENSG00000125430
chr17	14300813	14300826	E2F6	MA0471.2	HS3ST3B1	ENSG00000125430
chr17	28371367	28371380	E2F6	MA0471.2	SARM1	ENSG00000004139
chr17	39864210	39864223	E2F6	MA0471.2	IKZF3	ENSG00000161405
chr17	45317237	45317250	E2F6	MA0471.2	MAP3K14	ENSG00000006062
chr17	45317565	45317578	E2F6	MA0471.2	MAP3K14	ENSG00000006062
chr17	50200376	50200389	E2F6	MA0471.2	COL1A1	ENSG00000108821
chr17	63932351	63932364	E2F6	MA0471.2	CD79B	ENSG00000007312
chr17	63932377	63932390	E2F6	MA0471.2	CD79B	ENSG00000007312
chr17	68457983	68457996	E2F6	MA0471.2	WIPI1	ENSG00000070540
chr17	77140578	77140591	E2F6	MA0471.2	SEC14L1	ENSG00000129657
chr17	77140850	77140863	E2F6	MA0471.2	SEC14L1	ENSG00000129657
chr17	77140964	77140977	E2F6	MA0471.2	SEC14L1	ENSG00000129657
chr18	45687688	45687701	E2F6	MA0471.2	SLC14A1	ENSG00000141469
chr18	59899844	59899857	E2F6	MA0471.2	PMAIP1	ENSG00000141682
chr19	2096103	2096116	E2F6	MA0471.2	IZUMO4	ENSG00000099840
chr19	2476819	2476832	E2F6	MA0471.2	GADD45B	ENSG00000099860
chr19	11346282	11346295	E2F6	MA0471.2	CCDC159	ENSG00000183401
chr19	11346337	11346350	E2F6	MA0471.2	CCDC159	ENSG00000183401
chr19	12333762	12333775	E2F6	MA0471.2	ZNF563	ENSG00000188868
chr19	44748577	44748590	E2F6	MA0471.2	BCL3	ENSG00000069399
chr19	44748640	44748653	E2F6	MA0471.2	BCL3	ENSG00000069399
chr19	45002123	45002136	E2F6	MA0471.2	RELB	ENSG00000104856
chr19	46636274	46636287	E2F6	MA0471.2	GNG8	ENSG00000167414
chr19	46788645	46788658	E2F6	MA0471.2	SLC1A5	ENSG00000105281
chr19	54464165	54464178	E2F6	MA0471.2	LENG9	ENSG00000275183
chr19	54465068	54465081	E2F6	MA0471.2	LENG9	ENSG00000275183
chr2	24919214	24919227	E2F6	MA0471.2	ADCY3	ENSG00000138031
chr2	26503541	26503554	E2F6	MA0471.2	OTOF	ENSG00000115155
chr2	26503592	26503605	E2F6	MA0471.2	OTOF	ENSG00000115155
chr2	60881185	60881198	E2F6	MA0471.2	REL	ENSG00000162924
chr2	60881535	60881548	E2F6	MA0471.2	REL	ENSG00000162924
chr2	60881690	60881703	E2F6	MA0471.2	REL	ENSG00000162924
chr2	62196304	62196317	E2F6	MA0471.2	B3GNT2	ENSG00000170340
chr2	62196445	62196458	E2F6	MA0471.2	B3GNT2	ENSG00000170340
chr2	74198608	74198621	E2F6	MA0471.2	MTHFD2	ENSG00000065911
chr2	96145386	96145399	E2F6	MA0471.2	DUSP2	ENSG00000158050
chr2	96145638	96145651	E2F6	MA0471.2	DUSP2	ENSG00000158050
chr2	101252931	101252944	E2F6	MA0471.2	TBC1D8	ENSG00000204634
chr2	174487174	174487187	E2F6	MA0471.2	GPR155	ENSG00000163328
chr2	174487226	174487239	E2F6	MA0471.2	GPR155	ENSG00000163328
chr2	174487294	174487307	E2F6	MA0471.2	GPR155	ENSG00000163328
chr2	191678009	191678022	E2F6	MA0471.2	NABP1	ENSG00000173559
chr2	218896709	218896722	E2F6	MA0471.2	WNT10A	ENSG00000135925
chr2	240566512	240566525	E2F6	MA0471.2	RNPEPL1	ENSG00000142327
chr2	241036173	241036186	E2F6	MA0471.2	SNED1	ENSG00000162804
chr20	833527	833540	E2F6	MA0471.2	FAM110A	ENSG00000125898
chr20	844515	844528	E2F6	MA0471.2	FAM110A	ENSG00000125898
chr20	25248050	25248063	E2F6	MA0471.2	PYGB	ENSG00000100994
chr20	32207891	32207904	E2F6	MA0471.2	PLAGL2	ENSG00000126003
chr20	34704497	34704510	E2F6	MA0471.2	TP53INP2	ENSG00000078804
chr20	34704617	34704630	E2F6	MA0471.2	TP53INP2	ENSG00000078804
chr20	34709140	34709153	E2F6	MA0471.2	TP53INP2	ENSG00000078804
chr20	34709332	34709345	E2F6	MA0471.2	TP53INP2	ENSG00000078804
chr20	34709368	34709381	E2F6	MA0471.2	TP53INP2	ENSG00000078804
chr20	36461111	36461124	E2F6	MA0471.2	DLGAP4	ENSG00000080845
chr20	48828050	48828063	E2F6	MA0471.2	PREX1	ENSG00000124126
chr21	15064836	15064849	E2F6	MA0471.2	NRIP1	ENSG00000180530
chr22	20495966	20495979	E2F6	MA0471.2	KLHL22	ENSG00000099910
chr22	25564547	25564560	E2F6	MA0471.2	GRK3	ENSG00000100077
chr22	28883147	28883160	E2F6	MA0471.2	ZNRF3	ENSG00000183579
chr22	28883419	28883432	E2F6	MA0471.2	ZNRF3	ENSG00000183579
chr22	28883523	28883536	E2F6	MA0471.2	ZNRF3	ENSG00000183579
chr22	37122336	37122349	E2F6	MA0471.2	TMPRSS6	ENSG00000187045
chr22	37149997	37150010	E2F6	MA0471.2	IL2RB	ENSG00000100385
chr22	41941380	41941393	E2F6	MA0471.2	CENPM	ENSG00000100162
chr22	41946895	41946908	E2F6	MA0471.2	CENPM	ENSG00000100162
chr22	42070704	42070717	E2F6	MA0471.2	NAGA	ENSG00000198951
chr22	42070948	42070961	E2F6	MA0471.2	NAGA	ENSG00000198951
chr22	44702139	44702152	E2F6	MA0471.2	PRR5	ENSG00000186654
chr3	3799311	3799324	E2F6	MA0471.2	LRRN1	ENSG00000175928
chr3	3799335	3799348	E2F6	MA0471.2	LRRN1	ENSG00000175928
chr3	4979238	4979251	E2F6	MA0471.2	BHLHE40	ENSG00000134107
chr3	17742381	17742394	E2F6	MA0471.2	TBC1D5	ENSG00000131374
chr3	17742612	17742625	E2F6	MA0471.2	TBC1D5	ENSG00000131374
chr3	17742679	17742692	E2F6	MA0471.2	TBC1D5	ENSG00000131374
chr3	32460396	32460409	E2F6	MA0471.2	CMTM7	ENSG00000153551
chr3	39328104	39328117	E2F6	MA0471.2	CCR8	ENSG00000179934
chr3	48656100	48656113	E2F6	MA0471.2	CELSR3	ENSG00000008300
chr3	48656196	48656209	E2F6	MA0471.2	CELSR3	ENSG00000008300
chr3	56801964	56801977	E2F6	MA0471.2	ARHGEF3	ENSG00000163947
chr3	56802307	56802320	E2F6	MA0471.2	ARHGEF3	ENSG00000163947
chr3	56916448	56916461	E2F6	MA0471.2	ARHGEF3	ENSG00000163947
chr3	66472800	66472813	E2F6	MA0471.2	LRIG1	ENSG00000144749
chr3	66501162	66501175	E2F6	MA0471.2	LRIG1	ENSG00000144749
chr3	66501299	66501312	E2F6	MA0471.2	LRIG1	ENSG00000144749
chr3	101849089	101849102	E2F6	MA0471.2	NFKBIZ	ENSG00000144802
chr3	101849102	101849115	E2F6	MA0471.2	NFKBIZ	ENSG00000144802
chr3	101850052	101850065	E2F6	MA0471.2	NFKBIZ	ENSG00000144802
chr3	105366851	105366864	E2F6	MA0471.2	ALCAM	ENSG00000170017
chr3	105368764	105368777	E2F6	MA0471.2	ALCAM	ENSG00000170017
chr3	113947872	113947885	E2F6	MA0471.2	ZDHHC23	ENSG00000184307
chr3	130894216	130894229	E2F6	MA0471.2	ATP2C1	ENSG00000017260
chr3	143119268	143119281	E2F6	MA0471.2	CHST2	ENSG00000175040
chr3	183162797	183162810	E2F6	MA0471.2	LAMP3	ENSG00000078081
chr3	196081733	196081746	E2F6	MA0471.2	TFRC	ENSG00000072274
chr3	196081919	196081932	E2F6	MA0471.2	TFRC	ENSG00000072274
chr3	196082209	196082222	E2F6	MA0471.2	TFRC	ENSG00000072274
chr4	8242393	8242406	E2F6	MA0471.2	SH3TC1	ENSG00000125089
chr4	80184285	80184298	E2F6	MA0471.2	PRDM8	ENSG00000152784
chr4	112285951	112285964	E2F6	MA0471.2	TIFA	ENSG00000145365
chr4	121072301	121072314	E2F6	MA0471.2	NDNF	ENSG00000173376
chr4	144646042	144646055	E2F6	MA0471.2	HHIP	ENSG00000164161
chr4	155758855	155758868	E2F6	MA0471.2	GUCY1B1	ENSG00000061918
chr4	155758899	155758912	E2F6	MA0471.2	GUCY1B1	ENSG00000061918
chr4	173169181	173169194	E2F6	MA0471.2		ENSG00000245213
chr4	173370855	173370868	E2F6	MA0471.2	SAP30-DT	ENSG00000272870
chr4	173371711	173371724	E2F6	MA0471.2	SAP30-DT	ENSG00000272870
chr5	127030732	127030745	E2F6	MA0471.2	MARCHF3	ENSG00000173926
chr5	127030748	127030761	E2F6	MA0471.2	MARCHF3	ENSG00000173926
chr5	139652046	139652059	E2F6	MA0471.2	CXXC5	ENSG00000171604
chr5	141651464	141651477	E2F6	MA0471.2	FCHSD1	ENSG00000197948
chr5	151758518	151758531	E2F6	MA0471.2	ATOX1	ENSG00000177556
chr5	157731702	157731715	E2F6	MA0471.2	THG1L	ENSG00000113272
chr6	16685322	16685335	E2F6	MA0471.2	ATXN1	ENSG00000124788
chr6	20401531	20401544	E2F6	MA0471.2	E2F3	ENSG00000112242
chr6	20401821	20401834	E2F6	MA0471.2	E2F3	ENSG00000112242
chr6	20402119	20402132	E2F6	MA0471.2	E2F3	ENSG00000112242
chr6	20403417	20403430	E2F6	MA0471.2	E2F3	ENSG00000112242
chr6	20403477	20403490	E2F6	MA0471.2	E2F3	ENSG00000112242
chr6	31572142	31572155	E2F6	MA0471.2	LTA	ENSG00000226979
chr6	39229385	39229398	E2F6	MA0471.2	KCNK5	ENSG00000164626
chr6	41546517	41546530	E2F6	MA0471.2	FOXP4	ENSG00000137166
chr6	41546557	41546570	E2F6	MA0471.2	FOXP4	ENSG00000137166
chr6	44223572	44223585	E2F6	MA0471.2	SLC29A1	ENSG00000112759
chr6	44257475	44257488	E2F6	MA0471.2	SLC35B2	ENSG00000157593
chr6	44257535	44257548	E2F6	MA0471.2	SLC35B2	ENSG00000157593
chr6	44263569	44263582	E2F6	MA0471.2	NFKBIE	ENSG00000146232
chr6	44265638	44265651	E2F6	MA0471.2	NFKBIE	ENSG00000146232
chr6	53545140	53545153	E2F6	MA0471.2	GCLC	ENSG00000001084
chr6	70413377	70413390	E2F6	MA0471.2	FAM135A	ENSG00000082269
chr6	70413601	70413614	E2F6	MA0471.2	FAM135A	ENSG00000082269
chr6	110179873	110179886	E2F6	MA0471.2	WASF1	ENSG00000112290
chr6	119349563	119349576	E2F6	MA0471.2	MAN1A1	ENSG00000111885
chr6	119349893	119349906	E2F6	MA0471.2	MAN1A1	ENSG00000111885
chr6	119349939	119349952	E2F6	MA0471.2	MAN1A1	ENSG00000111885
chr6	119349974	119349987	E2F6	MA0471.2	MAN1A1	ENSG00000111885
chr6	119350490	119350503	E2F6	MA0471.2	MAN1A1	ENSG00000111885
chr6	131628196	131628209	E2F6	MA0471.2	ENPP3	ENSG00000154269
chr6	136792424	136792437	E2F6	MA0471.2	MAP3K5	ENSG00000197442
chr6	144063805	144063818	E2F6	MA0471.2	PLAGL1	ENSG00000118495
chr6	144150392	144150405	E2F6	MA0471.2	STX11	ENSG00000135604
chr6	150599763	150599776	E2F6	MA0471.2	PLEKHG1	ENSG00000120278
chr6	150599962	150599975	E2F6	MA0471.2	PLEKHG1	ENSG00000120278
chr6	150600340	150600353	E2F6	MA0471.2	PLEKHG1	ENSG00000120278
chr6	150600697	150600710	E2F6	MA0471.2	PLEKHG1	ENSG00000120278
chr7	2508687	2508700	E2F6	MA0471.2	LFNG	ENSG00000106003
chr7	2519730	2519743	E2F6	MA0471.2	LFNG	ENSG00000106003
chr7	6272638	6272651	E2F6	MA0471.2	CYTH3	ENSG00000008256
chr7	7969293	7969306	E2F6	MA0471.2	GLCCI1	ENSG00000106415
chr7	26864716	26864729	E2F6	MA0471.2	SKAP2	ENSG00000005020
chr7	26864791	26864804	E2F6	MA0471.2	SKAP2	ENSG00000005020
chr7	55533757	55533770	E2F6	MA0471.2	VOPP1	ENSG00000154978
chr7	55572628	55572641	E2F6	MA0471.2	VOPP1	ENSG00000154978
chr7	74289411	74289424	E2F6	MA0471.2	CLIP2	ENSG00000106665
chr7	75739019	75739032	E2F6	MA0471.2	HIP1	ENSG00000127946
chr7	75739085	75739098	E2F6	MA0471.2	HIP1	ENSG00000127946
chr7	107891017	107891030	E2F6	MA0471.2	DLD	ENSG00000091140
chr7	128939198	128939211	E2F6	MA0471.2	IRF5	ENSG00000128604
chr7	131105865	131105878	E2F6	MA0471.2	LINC-PINT	ENSG00000231721
chr7	131106059	131106072	E2F6	MA0471.2	LINC-PINT	ENSG00000231721
chr7	138002184	138002197	E2F6	MA0471.2	CREB3L2	ENSG00000182158
chr8	12754094	12754107	E2F6	MA0471.2	LONRF1	ENSG00000154359
chr8	37882067	37882080	E2F6	MA0471.2	RAB11FIP1	ENSG00000156675
chr8	37882088	37882101	E2F6	MA0471.2	RAB11FIP1	ENSG00000156675
chr8	37899799	37899812	E2F6	MA0471.2	RAB11FIP1	ENSG00000156675
chr8	80893842	80893855	E2F6	MA0471.2	ZNF704	ENSG00000164684
chr8	90645784	90645797	E2F6	MA0471.2	TMEM64	ENSG00000180694
chr8	94949621	94949634	E2F6	MA0471.2	TP53INP1	ENSG00000164938
chr8	124637558	124637571	E2F6	MA0471.2	MTSS1	ENSG00000170873
chr9	89604386	89604399	E2F6	MA0471.2	GADD45G	ENSG00000130222
chr9	89605438	89605451	E2F6	MA0471.2	GADD45G	ENSG00000130222
chr9	89605608	89605621	E2F6	MA0471.2	GADD45G	ENSG00000130222
chr9	89743913	89743926	E2F6	MA0471.2		ENSG00000237372
chr9	93133997	93134010	E2F6	MA0471.2	NINJ1	ENSG00000131669
chr9	132241360	132241373	E2F6	MA0471.2	NTNG2	ENSG00000196358
chr9	132241519	132241532	E2F6	MA0471.2	NTNG2	ENSG00000196358
chr9	136842671	136842684	E2F6	MA0471.2	AJM1	ENSG00000232434
chr9	136886664	136886677	E2F6	MA0471.2	TRAF2	ENSG00000127191
chr9	136901834	136901847	E2F6	MA0471.2	TRAF2	ENSG00000127191
chrX	30652919	30652932	E2F6	MA0471.2	GK	ENSG00000198814
chrX	30652988	30653001	E2F6	MA0471.2	GK	ENSG00000198814
chrX	41923585	41923598	E2F6	MA0471.2	CASK	ENSG00000147044
chrX	49200196	49200209	E2F6	MA0471.2	SYP	ENSG00000102003
chrX	49269198	49269211	E2F6	MA0471.2	PPP1R3F	ENSG00000049769
chrX	49269500	49269513	E2F6	MA0471.2	PPP1R3F	ENSG00000049769
chrX	49269617	49269630	E2F6	MA0471.2	PPP1R3F	ENSG00000049769
chrX	49269796	49269809	E2F6	MA0471.2	PPP1R3F	ENSG00000049769
chrX	55488831	55488844	E2F6	MA0471.2	USP51	ENSG00000247746
chrX	130060646	130060659	E2F6	MA0471.2	ELF4	ENSG00000102034
chr1	1201317	1201331	EGR1	MA0162.4	TNFRSF18	ENSG00000186891
chr1	1201516	1201530	EGR1	MA0162.4	TNFRSF18	ENSG00000186891
chr1	12178133	12178147	EGR1	MA0162.4	TNFRSF1B	ENSG00000028137
chr1	18902499	18902513	EGR1	MA0162.4	ALDH4A1	ENSG00000159423
chr1	24744925	24744939	EGR1	MA0162.4	CLIC4	ENSG00000169504
chr1	24745244	24745258	EGR1	MA0162.4	CLIC4	ENSG00000169504
chr1	24745325	24745339	EGR1	MA0162.4	CLIC4	ENSG00000169504
chr1	37479791	37479805	EGR1	MA0162.4	ZC3H12A	ENSG00000163874
chr1	39955127	39955141	EGR1	MA0162.4	MFSD2A	ENSG00000168389
chr1	40316767	40316781	EGR1	MA0162.4	COL9A2	ENSG00000049089
chr1	63773906	63773920	EGR1	MA0162.4	ROR1	ENSG00000185483
chr1	67685418	67685432	EGR1	MA0162.4	GADD45A	ENSG00000116717
chr1	92485909	92485923	EGR1	MA0162.4	GFI1	ENSG00000162676
chr1	94927144	94927158	EGR1	MA0162.4	CNN3	ENSG00000117519
chr1	94927345	94927359	EGR1	MA0162.4	CNN3	ENSG00000117519
chr1	109113944	109113958	EGR1	MA0162.4	KIAA1324	ENSG00000116299
chr1	116570431	116570445	EGR1	MA0162.4	CD58	ENSG00000116815
chr1	117605563	117605577	EGR1	MA0162.4	TENT5C	ENSG00000183508
chr1	117605996	117606010	EGR1	MA0162.4	TENT5C	ENSG00000183508
chr1	117606026	117606040	EGR1	MA0162.4	TENT5C	ENSG00000183508
chr1	117606102	117606116	EGR1	MA0162.4	TENT5C	ENSG00000183508
chr1	148952554	148952568	EGR1	MA0162.4	PDE4DIP	ENSG00000178104
chr1	156106461	156106475	EGR1	MA0162.4	LMNA	ENSG00000160789
chr1	156106612	156106626	EGR1	MA0162.4	LMNA	ENSG00000160789
chr1	156106634	156106648	EGR1	MA0162.4	LMNA	ENSG00000160789
chr1	156127200	156127214	EGR1	MA0162.4	LMNA	ENSG00000160789
chr1	156127263	156127277	EGR1	MA0162.4	LMNA	ENSG00000160789
chr1	156836253	156836267	EGR1	MA0162.4	NTRK1	ENSG00000198400
chr1	181105711	181105725	EGR1	MA0162.4	IER5	ENSG00000162783
chr1	184974011	184974025	EGR1	MA0162.4	NIBAN1	ENSG00000135842
chr1	184974116	184974130	EGR1	MA0162.4	NIBAN1	ENSG00000135842
chr1	184974160	184974174	EGR1	MA0162.4	NIBAN1	ENSG00000135842
chr1	185316210	185316224	EGR1	MA0162.4	IVNS1ABP	ENSG00000116679
chr1	185316253	185316267	EGR1	MA0162.4	IVNS1ABP	ENSG00000116679
chr1	229558812	229558826	EGR1	MA0162.4	ABCB10	ENSG00000135776
chr1	235866928	235866942	EGR1	MA0162.4	LYST	ENSG00000143669
chr1	245649368	245649382	EGR1	MA0162.4	KIF26B	ENSG00000162849
chr10	5976289	5976303	EGR1	MA0162.4	IL15RA	ENSG00000134470
chr10	70887924	70887938	EGR1	MA0162.4	PCBD1	ENSG00000166228
chr10	70887939	70887953	EGR1	MA0162.4	PCBD1	ENSG00000166228
chr10	79445794	79445808	EGR1	MA0162.4	ZCCHC24	ENSG00000165424
chr10	79445935	79445949	EGR1	MA0162.4	ZCCHC24	ENSG00000165424
chr10	91410187	91410201	EGR1	MA0162.4	HECTD2	ENSG00000165338
chr10	91410487	91410501	EGR1	MA0162.4	HECTD2	ENSG00000165338
chr10	96832175	96832189	EGR1	MA0162.4	LCOR	ENSG00000196233
chr10	96832224	96832238	EGR1	MA0162.4	LCOR	ENSG00000196233
chr10	96832253	96832267	EGR1	MA0162.4	LCOR	ENSG00000196233
chr10	96832811	96832825	EGR1	MA0162.4	LCOR	ENSG00000196233
chr10	96832830	96832844	EGR1	MA0162.4	LCOR	ENSG00000196233
chr10	97292664	97292678	EGR1	MA0162.4	ARHGAP19	ENSG00000213390
chr10	102394876	102394890	EGR1	MA0162.4	NFKB2	ENSG00000077150
chr10	102394948	102394962	EGR1	MA0162.4	NFKB2	ENSG00000077150
chr10	102395645	102395659	EGR1	MA0162.4	NFKB2	ENSG00000077150
chr10	102409415	102409429	EGR1	MA0162.4	PSD	ENSG00000059915
chr10	102420786	102420800	EGR1	MA0162.4	PSD	ENSG00000059915
chr10	110497515	110497529	EGR1	MA0162.4	DUSP5	ENSG00000138166
chr10	110497764	110497778	EGR1	MA0162.4	DUSP5	ENSG00000138166
chr10	114304988	114305002	EGR1	MA0162.4	AFAP1L2	ENSG00000169129
chr10	133357766	133357780	EGR1	MA0162.4	FUOM	ENSG00000148803
chr10	133358018	133358032	EGR1	MA0162.4	FUOM	ENSG00000148803
chr11	9664005	9664019	EGR1	MA0162.4	SWAP70	ENSG00000133789
chr11	44950939	44950953	EGR1	MA0162.4	TP53I11	ENSG00000175274
chr11	62545510	62545524	EGR1	MA0162.4	AHNAK	ENSG00000124942
chr11	65416469	65416483	EGR1	MA0162.4	NEAT1	ENSG00000245532
chr11	65421525	65421539	EGR1	MA0162.4	NEAT1	ENSG00000245532
chr11	65425409	65425423	EGR1	MA0162.4	NEAT1	ENSG00000245532
chr11	66546239	66546253	EGR1	MA0162.4	ZDHHC24	ENSG00000174165
chr11	78417888	78417902	EGR1	MA0162.4	GAB2	ENSG00000033327
chr11	78417974	78417988	EGR1	MA0162.4	GAB2	ENSG00000033327
chr11	95231126	95231140	EGR1	MA0162.4	SESN3	ENSG00000149212
chr11	118876959	118876973	EGR1	MA0162.4	CXCR5	ENSG00000160683
chr11	119317165	119317179	EGR1	MA0162.4	MCAM	ENSG00000076706
chr11	130069630	130069644	EGR1	MA0162.4	APLP2	ENSG00000084234
chr11	130069663	130069677	EGR1	MA0162.4	APLP2	ENSG00000084234
chr12	7108534	7108548	EGR1	MA0162.4	C1RL-AS1	ENSG00000205885
chr12	8914677	8914691	EGR1	MA0162.4	PHC1	ENSG00000111752
chr12	40106035	40106049	EGR1	MA0162.4	SLC2A13	ENSG00000151229
chr12	40106141	40106155	EGR1	MA0162.4	SLC2A13	ENSG00000151229
chr12	53268450	53268464	EGR1	MA0162.4	ESPL1	ENSG00000135476
chr12	68933228	68933242	EGR1	MA0162.4	CPM	ENSG00000135678
chr12	103495620	103495634	EGR1	MA0162.4	C12orf42	ENSG00000179088
chr12	104958331	104958345	EGR1	MA0162.4	SLC41A2	ENSG00000136052
chr12	104958740	104958754	EGR1	MA0162.4	SLC41A2	ENSG00000136052
chr12	113136034	113136048	EGR1	MA0162.4	RASAL1	ENSG00000111344
chr12	123151172	123151186	EGR1	MA0162.4	PITPNM2	ENSG00000090975
chr13	42040682	42040696	EGR1	MA0162.4	DGKH	ENSG00000102780
chr13	67230390	67230404	EGR1	MA0162.4	PCDH9	ENSG00000184226
chr13	67230424	67230438	EGR1	MA0162.4	PCDH9	ENSG00000184226
chr13	67230597	67230611	EGR1	MA0162.4	PCDH9	ENSG00000184226
chr13	75482190	75482204	EGR1	MA0162.4	TBC1D4	ENSG00000136111
chr14	24094255	24094269	EGR1	MA0162.4	PCK2	ENSG00000100889
chr14	35404135	35404149	EGR1	MA0162.4	NFKBIA	ENSG00000100906
chr14	35404166	35404180	EGR1	MA0162.4	NFKBIA	ENSG00000100906
chr14	35404346	35404360	EGR1	MA0162.4	NFKBIA	ENSG00000100906
chr14	100306515	100306529	EGR1	MA0162.4	SLC25A29	ENSG00000197119
chr15	67521608	67521622	EGR1	MA0162.4	IQCH-AS1	ENSG00000259673
chr15	91853209	91853223	EGR1	MA0162.4	SLCO3A1	ENSG00000176463
chr16	8674438	8674452	EGR1	MA0162.4	ABAT	ENSG00000183044
chr16	27402119	27402133	EGR1	MA0162.4	IL21R	ENSG00000103522
chr16	81779315	81779329	EGR1	MA0162.4	PLCG2	ENSG00000197943
chr16	88452624	88452638	EGR1	MA0162.4	ZFPM1	ENSG00000179588
chr16	88452746	88452760	EGR1	MA0162.4	ZFPM1	ENSG00000179588
chr16	88452947	88452961	EGR1	MA0162.4	ZFPM1	ENSG00000179588
chr16	88453077	88453091	EGR1	MA0162.4	ZFPM1	ENSG00000179588
chr16	88453133	88453147	EGR1	MA0162.4	ZFPM1	ENSG00000179588
chr16	88453213	88453227	EGR1	MA0162.4	ZFPM1	ENSG00000179588
chr16	88457102	88457116	EGR1	MA0162.4	ZFPM1	ENSG00000179588
chr17	1473926	1473940	EGR1	MA0162.4	MYO1C	ENSG00000197879
chr17	1628349	1628363	EGR1	MA0162.4	SLC43A2	ENSG00000167703
chr17	1628945	1628959	EGR1	MA0162.4	SLC43A2	ENSG00000167703
chr17	2786537	2786551	EGR1	MA0162.4		ENSG00000132359
chr17	2814771	2814785	EGR1	MA0162.4		ENSG00000132359
chr17	14300751	14300765	EGR1	MA0162.4	HS3ST3B1	ENSG00000125430
chr17	14301041	14301055	EGR1	MA0162.4	HS3ST3B1	ENSG00000125430
chr17	14309558	14309572	EGR1	MA0162.4		ENSG00000266709
chr17	45317185	45317199	EGR1	MA0162.4	MAP3K14	ENSG00000006062
chr17	50200408	50200422	EGR1	MA0162.4	COL1A1	ENSG00000108821
chr17	68457475	68457489	EGR1	MA0162.4	WIPI1	ENSG00000070540
chr17	77140761	77140775	EGR1	MA0162.4	SEC14L1	ENSG00000129657
chr17	77140853	77140867	EGR1	MA0162.4	SEC14L1	ENSG00000129657
chr17	77140877	77140891	EGR1	MA0162.4	SEC14L1	ENSG00000129657
chr17	77140909	77140923	EGR1	MA0162.4	SEC14L1	ENSG00000129657
chr17	81937301	81937315	EGR1	MA0162.4	PYCR1	ENSG00000183010
chr18	59899847	59899861	EGR1	MA0162.4	PMAIP1	ENSG00000141682
chr19	2096728	2096742	EGR1	MA0162.4	IZUMO4	ENSG00000099840
chr19	2096831	2096845	EGR1	MA0162.4	IZUMO4	ENSG00000099840
chr19	2097376	2097390	EGR1	MA0162.4	IZUMO4	ENSG00000099840
chr19	2474868	2474882	EGR1	MA0162.4	GADD45B	ENSG00000099860
chr19	2475337	2475351	EGR1	MA0162.4	GADD45B	ENSG00000099860
chr19	2475363	2475377	EGR1	MA0162.4	GADD45B	ENSG00000099860
chr19	2475964	2475978	EGR1	MA0162.4	GADD45B	ENSG00000099860
chr19	2476655	2476669	EGR1	MA0162.4	GADD45B	ENSG00000099860
chr19	10416802	10416816	EGR1	MA0162.4	PDE4A	ENSG00000065989
chr19	11346208	11346222	EGR1	MA0162.4	CCDC159	ENSG00000183401
chr19	11346701	11346715	EGR1	MA0162.4	CCDC159	ENSG00000183401
chr19	17539944	17539958	EGR1	MA0162.4	NIBAN3	ENSG00000167483
chr19	44748541	44748555	EGR1	MA0162.4	BCL3	ENSG00000069399
chr19	44748636	44748650	EGR1	MA0162.4	BCL3	ENSG00000069399
chr19	45001304	45001318	EGR1	MA0162.4	RELB	ENSG00000104856
chr19	45001418	45001432	EGR1	MA0162.4	RELB	ENSG00000104856
chr19	45001903	45001917	EGR1	MA0162.4	RELB	ENSG00000104856
chr19	45002100	45002114	EGR1	MA0162.4	RELB	ENSG00000104856
chr19	46636218	46636232	EGR1	MA0162.4	GNG8	ENSG00000167414
chr2	24917310	24917324	EGR1	MA0162.4	ADCY3	ENSG00000138031
chr2	46941036	46941050	EGR1	MA0162.4	TTC7A	ENSG00000068724
chr2	46941147	46941161	EGR1	MA0162.4	TTC7A	ENSG00000068724
chr2	46941479	46941493	EGR1	MA0162.4	TTC7A	ENSG00000068724
chr2	46987141	46987155	EGR1	MA0162.4	TTC7A	ENSG00000068724
chr2	60881036	60881050	EGR1	MA0162.4	REL	ENSG00000162924
chr2	60881406	60881420	EGR1	MA0162.4	REL	ENSG00000162924
chr2	60881474	60881488	EGR1	MA0162.4	REL	ENSG00000162924
chr2	62195900	62195914	EGR1	MA0162.4	B3GNT2	ENSG00000170340
chr2	96145531	96145545	EGR1	MA0162.4	DUSP2	ENSG00000158050
chr2	100104872	100104886	EGR1	MA0162.4	AFF3	ENSG00000144218
chr2	101151508	101151522	EGR1	MA0162.4	TBC1D8	ENSG00000204634
chr2	174487084	174487098	EGR1	MA0162.4	GPR155	ENSG00000163328
chr2	174487297	174487311	EGR1	MA0162.4	GPR155	ENSG00000163328
chr2	191677904	191677918	EGR1	MA0162.4	NABP1	ENSG00000173559
chr2	191678116	191678130	EGR1	MA0162.4	NABP1	ENSG00000173559
chr2	218880574	218880588	EGR1	MA0162.4	WNT10A	ENSG00000135925
chr2	218897131	218897145	EGR1	MA0162.4	WNT10A	ENSG00000135925
chr2	240566281	240566295	EGR1	MA0162.4	RNPEPL1	ENSG00000142327
chr2	240566617	240566631	EGR1	MA0162.4	RNPEPL1	ENSG00000142327
chr20	844527	844541	EGR1	MA0162.4	FAM110A	ENSG00000125898
chr20	844836	844850	EGR1	MA0162.4	FAM110A	ENSG00000125898
chr20	32207837	32207851	EGR1	MA0162.4	PLAGL2	ENSG00000126003
chr20	34709531	34709545	EGR1	MA0162.4	TP53INP2	ENSG00000078804
chr20	36461198	36461212	EGR1	MA0162.4	DLGAP4	ENSG00000080845
chr20	36461236	36461250	EGR1	MA0162.4	DLGAP4	ENSG00000080845
chr20	43751174	43751188	EGR1	MA0162.4	GTSF1L	ENSG00000124196
chr20	48828015	48828029	EGR1	MA0162.4	PREX1	ENSG00000124126
chr20	48828056	48828070	EGR1	MA0162.4	PREX1	ENSG00000124126
chr20	49713917	49713931	EGR1	MA0162.4	B4GALT5	ENSG00000158470
chr21	15064910	15064924	EGR1	MA0162.4	NRIP1	ENSG00000180530
chr22	20495859	20495873	EGR1	MA0162.4	KLHL22	ENSG00000099910
chr22	20495951	20495965	EGR1	MA0162.4	KLHL22	ENSG00000099910
chr22	25564812	25564826	EGR1	MA0162.4	GRK3	ENSG00000100077
chr22	28883205	28883219	EGR1	MA0162.4	ZNRF3	ENSG00000183579
chr22	28883310	28883324	EGR1	MA0162.4	ZNRF3	ENSG00000183579
chr22	37150208	37150222	EGR1	MA0162.4	IL2RB	ENSG00000100385
chr22	41946898	41946912	EGR1	MA0162.4	CENPM	ENSG00000100162
chr22	44668488	44668502	EGR1	MA0162.4	PRR5	ENSG00000186654
chr22	44668655	44668669	EGR1	MA0162.4	PRR5	ENSG00000186654
chr22	44701896	44701910	EGR1	MA0162.4	PRR5	ENSG00000186654
chr22	44702090	44702104	EGR1	MA0162.4	PRR5	ENSG00000186654
chr22	44702124	44702138	EGR1	MA0162.4	PRR5	ENSG00000186654
chr3	3799307	3799321	EGR1	MA0162.4	LRRN1	ENSG00000175928
chr3	14402818	14402832	EGR1	MA0162.4	SLC6A6	ENSG00000131389
chr3	33097242	33097256	EGR1	MA0162.4	GLB1	ENSG00000170266
chr3	48656093	48656107	EGR1	MA0162.4	CELSR3	ENSG00000008300
chr3	56783985	56783999	EGR1	MA0162.4	ARHGEF3	ENSG00000163947
chr3	56801960	56801974	EGR1	MA0162.4	ARHGEF3	ENSG00000163947
chr3	56802000	56802014	EGR1	MA0162.4	ARHGEF3	ENSG00000163947
chr3	56802149	56802163	EGR1	MA0162.4	ARHGEF3	ENSG00000163947
chr3	66501062	66501076	EGR1	MA0162.4	LRIG1	ENSG00000144749
chr3	66501080	66501094	EGR1	MA0162.4	LRIG1	ENSG00000144749
chr3	66501264	66501278	EGR1	MA0162.4	LRIG1	ENSG00000144749
chr3	101827916	101827930	EGR1	MA0162.4	NFKBIZ	ENSG00000144802
chr3	101849891	101849905	EGR1	MA0162.4	NFKBIZ	ENSG00000144802
chr3	105368760	105368774	EGR1	MA0162.4	ALCAM	ENSG00000170017
chr3	113947890	113947904	EGR1	MA0162.4	ZDHHC23	ENSG00000184307
chr3	130893739	130893753	EGR1	MA0162.4	ATP2C1	ENSG00000017260
chr3	187740058	187740072	EGR1	MA0162.4	BCL6	ENSG00000113916
chr3	187740219	187740233	EGR1	MA0162.4	BCL6	ENSG00000113916
chr3	196082129	196082143	EGR1	MA0162.4	TFRC	ENSG00000072274
chr4	1010458	1010472	EGR1	MA0162.4	FGFRL1	ENSG00000127418
chr4	1011352	1011366	EGR1	MA0162.4	FGFRL1	ENSG00000127418
chr4	1011403	1011417	EGR1	MA0162.4	FGFRL1	ENSG00000127418
chr4	1011486	1011500	EGR1	MA0162.4	FGFRL1	ENSG00000127418
chr4	1055918	1055932	EGR1	MA0162.4	RNF212	ENSG00000178222
chr4	80183714	80183728	EGR1	MA0162.4	PRDM8	ENSG00000152784
chr4	80183747	80183761	EGR1	MA0162.4	PRDM8	ENSG00000152784
chr4	80183815	80183829	EGR1	MA0162.4	PRDM8	ENSG00000152784
chr4	80184288	80184302	EGR1	MA0162.4	PRDM8	ENSG00000152784
chr4	144646029	144646043	EGR1	MA0162.4	HHIP	ENSG00000164161
chr4	144646057	144646071	EGR1	MA0162.4	HHIP	ENSG00000164161
chr4	155758851	155758865	EGR1	MA0162.4	GUCY1B1	ENSG00000061918
chr4	173370866	173370880	EGR1	MA0162.4	SAP30-DT	ENSG00000272870
chr4	173371318	173371332	EGR1	MA0162.4	SAP30-DT	ENSG00000272870
chr4	185143314	185143328	EGR1	MA0162.4	SLC25A4	ENSG00000151729
chr5	126988114	126988128	EGR1	MA0162.4	MARCHF3	ENSG00000173926
chr5	138439009	138439023	EGR1	MA0162.4	REEP2	ENSG00000132563
chr5	141651467	141651481	EGR1	MA0162.4	FCHSD1	ENSG00000197948
chr5	151758671	151758685	EGR1	MA0162.4	ATOX1	ENSG00000177556
chr5	151759096	151759110	EGR1	MA0162.4	ATOX1	ENSG00000177556
chr5	177497603	177497617	EGR1	MA0162.4	PDLIM7	ENSG00000196923
chr5	177497639	177497653	EGR1	MA0162.4	PDLIM7	ENSG00000196923
chr6	2903352	2903366	EGR1	MA0162.4	SERPINB9	ENSG00000170542
chr6	14117756	14117770	EGR1	MA0162.4	CD83	ENSG00000112149
chr6	14117895	14117909	EGR1	MA0162.4	CD83	ENSG00000112149
chr6	16685430	16685444	EGR1	MA0162.4	ATXN1	ENSG00000124788
chr6	20401527	20401541	EGR1	MA0162.4	E2F3	ENSG00000112242
chr6	41546553	41546567	EGR1	MA0162.4	FOXP4	ENSG00000137166
chr6	43229461	43229475	EGR1	MA0162.4	DNPH1	ENSG00000112667
chr6	44223487	44223501	EGR1	MA0162.4	SLC29A1	ENSG00000112759
chr6	44257610	44257624	EGR1	MA0162.4	SLC35B2	ENSG00000157593
chr6	44265630	44265644	EGR1	MA0162.4	NFKBIE	ENSG00000146232
chr6	53548217	53548231	EGR1	MA0162.4	GCLC	ENSG00000001084
chr6	70413412	70413426	EGR1	MA0162.4	FAM135A	ENSG00000082269
chr6	109009553	109009567	EGR1	MA0162.4	SESN1	ENSG00000080546
chr6	110179106	110179120	EGR1	MA0162.4	WASF1	ENSG00000112290
chr6	110179249	110179263	EGR1	MA0162.4	WASF1	ENSG00000112290
chr6	110179891	110179905	EGR1	MA0162.4	WASF1	ENSG00000112290
chr6	110180074	110180088	EGR1	MA0162.4	WASF1	ENSG00000112290
chr6	119349559	119349573	EGR1	MA0162.4	MAN1A1	ENSG00000111885
chr6	119349857	119349871	EGR1	MA0162.4	MAN1A1	ENSG00000111885
chr6	119350493	119350507	EGR1	MA0162.4	MAN1A1	ENSG00000111885
chr6	136792270	136792284	EGR1	MA0162.4	MAP3K5	ENSG00000197442
chr6	150600529	150600543	EGR1	MA0162.4	PLEKHG1	ENSG00000120278
chr6	150600976	150600990	EGR1	MA0162.4	PLEKHG1	ENSG00000120278
chr7	1044571	1044585	EGR1	MA0162.4	GPR146	ENSG00000164849
chr7	2403566	2403580	EGR1	MA0162.4	CHST12	ENSG00000136213
chr7	2508861	2508875	EGR1	MA0162.4	LFNG	ENSG00000106003
chr7	2519715	2519729	EGR1	MA0162.4	LFNG	ENSG00000106003
chr7	6272703	6272717	EGR1	MA0162.4	CYTH3	ENSG00000008256
chr7	7969251	7969265	EGR1	MA0162.4	GLCCI1	ENSG00000106415
chr7	7969472	7969486	EGR1	MA0162.4	GLCCI1	ENSG00000106415
chr7	18639257	18639271	EGR1	MA0162.4	HDAC9	ENSG00000048052
chr7	26864752	26864766	EGR1	MA0162.4	SKAP2	ENSG00000005020
chr7	39733478	39733492	EGR1	MA0162.4	LINC00265	ENSG00000188185
chr7	44979049	44979063	EGR1	MA0162.4	MYO1G	ENSG00000136286
chr7	48089104	48089118	EGR1	MA0162.4	UPP1	ENSG00000183696
chr7	75739092	75739106	EGR1	MA0162.4	HIP1	ENSG00000127946
chr7	75739295	75739309	EGR1	MA0162.4	HIP1	ENSG00000127946
chr7	75994549	75994563	EGR1	MA0162.4	TMEM120A	ENSG00000189077
chr7	75994638	75994652	EGR1	MA0162.4	TMEM120A	ENSG00000189077
chr7	76009271	76009285	EGR1	MA0162.4	TMEM120A	ENSG00000189077
chr7	104945208	104945222	EGR1	MA0162.4		ENSG00000237513
chr7	116526266	116526280	EGR1	MA0162.4	CAV1	ENSG00000105974
chr7	131105868	131105882	EGR1	MA0162.4	LINC-PINT	ENSG00000231721
chr7	131105961	131105975	EGR1	MA0162.4	LINC-PINT	ENSG00000231721
chr7	131105983	131105997	EGR1	MA0162.4	LINC-PINT	ENSG00000231721
chr7	131106055	131106069	EGR1	MA0162.4	LINC-PINT	ENSG00000231721
chr7	131106190	131106204	EGR1	MA0162.4	LINC-PINT	ENSG00000231721
chr7	138002219	138002233	EGR1	MA0162.4	CREB3L2	ENSG00000182158
chr8	12754536	12754550	EGR1	MA0162.4	LONRF1	ENSG00000154359
chr8	37899535	37899549	EGR1	MA0162.4	RAB11FIP1	ENSG00000156675
chr8	81280546	81280560	EGR1	MA0162.4	FABP5	ENSG00000164687
chr8	81280578	81280592	EGR1	MA0162.4	FABP5	ENSG00000164687
chr8	90645751	90645765	EGR1	MA0162.4	TMEM64	ENSG00000180694
chr8	90645787	90645801	EGR1	MA0162.4	TMEM64	ENSG00000180694
chr8	90646144	90646158	EGR1	MA0162.4	TMEM64	ENSG00000180694
chr8	97775772	97775786	EGR1	MA0162.4	LAPTM4B	ENSG00000104341
chr9	89701672	89701686	EGR1	MA0162.4		ENSG00000237372
chr9	93134606	93134620	EGR1	MA0162.4	NINJ1	ENSG00000131669
chr9	96450132	96450146	EGR1	MA0162.4	HABP4	ENSG00000130956
chr9	120931607	120931621	EGR1	MA0162.4	TRAF1	ENSG00000056558
chr9	127569128	127569142	EGR1	MA0162.4	NIBAN2	ENSG00000136830
chr9	127569269	127569283	EGR1	MA0162.4	NIBAN2	ENSG00000136830
chr9	129488686	129488700	EGR1	MA0162.4	LINC00963	ENSG00000204054
chr9	129496105	129496119	EGR1	MA0162.4	LINC00963	ENSG00000204054
chr9	132241060	132241074	EGR1	MA0162.4	NTNG2	ENSG00000196358
chr9	132241103	132241117	EGR1	MA0162.4	NTNG2	ENSG00000196358
chr9	132241207	132241221	EGR1	MA0162.4	NTNG2	ENSG00000196358
chr9	132241356	132241370	EGR1	MA0162.4	NTNG2	ENSG00000196358
chr9	136843977	136843991	EGR1	MA0162.4	AJM1	ENSG00000232434
chr9	136886660	136886674	EGR1	MA0162.4	TRAF2	ENSG00000127191
chr9	136886683	136886697	EGR1	MA0162.4	TRAF2	ENSG00000127191
chr9	136901873	136901887	EGR1	MA0162.4	TRAF2	ENSG00000127191
chr9	137028323	137028337	EGR1	MA0162.4	ABCA2	ENSG00000107331
chr9	137028376	137028390	EGR1	MA0162.4	ABCA2	ENSG00000107331
chrX	30653289	30653303	EGR1	MA0162.4	GK	ENSG00000198814
chrX	41923548	41923562	EGR1	MA0162.4	CASK	ENSG00000147044
chrX	41923581	41923595	EGR1	MA0162.4	CASK	ENSG00000147044
chrX	41923722	41923736	EGR1	MA0162.4	CASK	ENSG00000147044
chrX	46759225	46759239	EGR1	MA0162.4	SLC9A7	ENSG00000065923
chrX	49269632	49269646	EGR1	MA0162.4	PPP1R3F	ENSG00000049769
chr1	1201518	1201529	EGR2	MA0472.2	TNFRSF18	ENSG00000186891
chr1	1201546	1201557	EGR2	MA0472.2	TNFRSF18	ENSG00000186891
chr1	12204268	12204279	EGR2	MA0472.2	TNFRSF1B	ENSG00000028137
chr1	37479793	37479804	EGR2	MA0472.2	ZC3H12A	ENSG00000163874
chr1	40316768	40316779	EGR2	MA0472.2	COL9A2	ENSG00000049089
chr1	92485928	92485939	EGR2	MA0472.2	GFI1	ENSG00000162676
chr1	94927146	94927157	EGR2	MA0472.2	CNN3	ENSG00000117519
chr1	116571031	116571042	EGR2	MA0472.2	CD58	ENSG00000116815
chr1	117605564	117605575	EGR2	MA0472.2	TENT5C	ENSG00000183508
chr1	117606104	117606115	EGR2	MA0472.2	TENT5C	ENSG00000183508
chr1	156106463	156106474	EGR2	MA0472.2	LMNA	ENSG00000160789
chr1	156106614	156106625	EGR2	MA0472.2	LMNA	ENSG00000160789
chr1	181105713	181105724	EGR2	MA0472.2	IER5	ENSG00000162783
chr1	184974012	184974023	EGR2	MA0472.2	NIBAN1	ENSG00000135842
chr1	185316726	185316737	EGR2	MA0472.2	IVNS1ABP	ENSG00000116679
chr1	229558814	229558825	EGR2	MA0472.2	ABCB10	ENSG00000135776
chr10	70887926	70887937	EGR2	MA0472.2	PCBD1	ENSG00000166228
chr10	79445796	79445807	EGR2	MA0472.2	ZCCHC24	ENSG00000165424
chr10	79445921	79445932	EGR2	MA0472.2	ZCCHC24	ENSG00000165424
chr10	96832225	96832236	EGR2	MA0472.2	LCOR	ENSG00000196233
chr10	96832312	96832323	EGR2	MA0472.2	LCOR	ENSG00000196233
chr10	102409416	102409427	EGR2	MA0472.2	PSD	ENSG00000059915
chr10	133357767	133357778	EGR2	MA0472.2	FUOM	ENSG00000148803
chr11	44950941	44950952	EGR2	MA0472.2	TP53I11	ENSG00000175274
chr11	65416470	65416481	EGR2	MA0472.2	NEAT1	ENSG00000245532
chr11	95231128	95231139	EGR2	MA0472.2	SESN3	ENSG00000149212
chr11	118876960	118876971	EGR2	MA0472.2	CXCR5	ENSG00000160683
chr11	130069632	130069643	EGR2	MA0472.2	APLP2	ENSG00000084234
chr11	130069664	130069675	EGR2	MA0472.2	APLP2	ENSG00000084234
chr12	53268451	53268462	EGR2	MA0472.2	ESPL1	ENSG00000135476
chr12	57229588	57229599	EGR2	MA0472.2	SHMT2	ENSG00000182199
chr12	103495621	103495632	EGR2	MA0472.2	C12orf42	ENSG00000179088
chr12	104958333	104958344	EGR2	MA0472.2	SLC41A2	ENSG00000136052
chr12	104958741	104958752	EGR2	MA0472.2	SLC41A2	ENSG00000136052
chr12	113136276	113136287	EGR2	MA0472.2	RASAL1	ENSG00000111344
chr13	42040683	42040694	EGR2	MA0472.2	DGKH	ENSG00000102780
chr13	67230598	67230609	EGR2	MA0472.2	PCDH9	ENSG00000184226
chr14	24094257	24094268	EGR2	MA0472.2	PCK2	ENSG00000100889
chr15	67521610	67521621	EGR2	MA0472.2	IQCH-AS1	ENSG00000259673
chr16	27367600	27367611	EGR2	MA0472.2	IL4R	ENSG00000077238
chr16	27402293	27402304	EGR2	MA0472.2	IL21R	ENSG00000103522
chr16	88452625	88452636	EGR2	MA0472.2	ZFPM1	ENSG00000179588
chr16	88452747	88452758	EGR2	MA0472.2	ZFPM1	ENSG00000179588
chr16	88453134	88453145	EGR2	MA0472.2	ZFPM1	ENSG00000179588
chr17	1473928	1473939	EGR2	MA0472.2	MYO1C	ENSG00000197879
chr17	1628518	1628529	EGR2	MA0472.2	SLC43A2	ENSG00000167703
chr17	2814772	2814783	EGR2	MA0472.2		ENSG00000132359
chr17	14301043	14301054	EGR2	MA0472.2	HS3ST3B1	ENSG00000125430
chr17	14309560	14309571	EGR2	MA0472.2		ENSG00000266709
chr17	45317187	45317198	EGR2	MA0472.2	MAP3K14	ENSG00000006062
chr17	45317456	45317467	EGR2	MA0472.2	MAP3K14	ENSG00000006062
chr17	50200409	50200420	EGR2	MA0472.2	COL1A1	ENSG00000108821
chr17	77140763	77140774	EGR2	MA0472.2	SEC14L1	ENSG00000129657
chr17	77140855	77140866	EGR2	MA0472.2	SEC14L1	ENSG00000129657
chr17	77140879	77140890	EGR2	MA0472.2	SEC14L1	ENSG00000129657
chr19	2475338	2475349	EGR2	MA0472.2	GADD45B	ENSG00000099860
chr19	2475365	2475376	EGR2	MA0472.2	GADD45B	ENSG00000099860
chr19	2475966	2475977	EGR2	MA0472.2	GADD45B	ENSG00000099860
chr19	8343310	8343321	EGR2	MA0472.2	KANK3	ENSG00000186994
chr19	10416803	10416814	EGR2	MA0472.2	PDE4A	ENSG00000065989
chr19	11346210	11346221	EGR2	MA0472.2	CCDC159	ENSG00000183401
chr19	45001306	45001317	EGR2	MA0472.2	RELB	ENSG00000104856
chr19	45001420	45001431	EGR2	MA0472.2	RELB	ENSG00000104856
chr19	46619903	46619914	EGR2	MA0472.2	PTGIR	ENSG00000160013
chr19	46634253	46634264	EGR2	MA0472.2	GNG8	ENSG00000167414
chr2	24917311	24917322	EGR2	MA0472.2	ADCY3	ENSG00000138031
chr2	46941037	46941048	EGR2	MA0472.2	TTC7A	ENSG00000068724
chr2	46941149	46941160	EGR2	MA0472.2	TTC7A	ENSG00000068724
chr2	60881407	60881418	EGR2	MA0472.2	REL	ENSG00000162924
chr2	60881476	60881487	EGR2	MA0472.2	REL	ENSG00000162924
chr2	96145533	96145544	EGR2	MA0472.2	DUSP2	ENSG00000158050
chr2	174487086	174487097	EGR2	MA0472.2	GPR155	ENSG00000163328
chr2	191678117	191678128	EGR2	MA0472.2	NABP1	ENSG00000173559
chr2	218880576	218880587	EGR2	MA0472.2	WNT10A	ENSG00000135925
chr2	241858969	241858980	EGR2	MA0472.2	PDCD1	ENSG00000188389
chr20	844838	844849	EGR2	MA0472.2	FAM110A	ENSG00000125898
chr20	32207838	32207849	EGR2	MA0472.2	PLAGL2	ENSG00000126003
chr20	49713918	49713929	EGR2	MA0472.2	B4GALT5	ENSG00000158470
chr22	20495952	20495963	EGR2	MA0472.2	KLHL22	ENSG00000099910
chr22	28883206	28883217	EGR2	MA0472.2	ZNRF3	ENSG00000183579
chr22	28883311	28883322	EGR2	MA0472.2	ZNRF3	ENSG00000183579
chr22	37150067	37150078	EGR2	MA0472.2	IL2RB	ENSG00000100385
chr22	41946900	41946911	EGR2	MA0472.2	CENPM	ENSG00000100162
chr3	3799308	3799319	EGR2	MA0472.2	LRRN1	ENSG00000175928
chr3	17742369	17742380	EGR2	MA0472.2	TBC1D5	ENSG00000131374
chr3	56801961	56801972	EGR2	MA0472.2	ARHGEF3	ENSG00000163947
chr3	56802151	56802162	EGR2	MA0472.2	ARHGEF3	ENSG00000163947
chr3	56802163	56802174	EGR2	MA0472.2	ARHGEF3	ENSG00000163947
chr3	101827845	101827856	EGR2	MA0472.2	NFKBIZ	ENSG00000144802
chr3	105368761	105368772	EGR2	MA0472.2	ALCAM	ENSG00000170017
chr3	130893724	130893735	EGR2	MA0472.2	ATP2C1	ENSG00000017260
chr3	130893740	130893751	EGR2	MA0472.2	ATP2C1	ENSG00000017260
chr4	1011404	1011415	EGR2	MA0472.2	FGFRL1	ENSG00000127418
chr4	1011487	1011498	EGR2	MA0472.2	FGFRL1	ENSG00000127418
chr4	1055920	1055931	EGR2	MA0472.2	RNF212	ENSG00000178222
chr4	80183716	80183727	EGR2	MA0472.2	PRDM8	ENSG00000152784
chr4	80183749	80183760	EGR2	MA0472.2	PRDM8	ENSG00000152784
chr4	80184290	80184301	EGR2	MA0472.2	PRDM8	ENSG00000152784
chr4	155758852	155758863	EGR2	MA0472.2	GUCY1B1	ENSG00000061918
chr4	173371319	173371330	EGR2	MA0472.2	SAP30-DT	ENSG00000272870
chr4	185143315	185143326	EGR2	MA0472.2	SLC25A4	ENSG00000151729
chr6	2903354	2903365	EGR2	MA0472.2	SERPINB9	ENSG00000170542
chr6	39229482	39229493	EGR2	MA0472.2	KCNK5	ENSG00000164626
chr6	109009624	109009635	EGR2	MA0472.2	SESN1	ENSG00000080546
chr6	110179893	110179904	EGR2	MA0472.2	WASF1	ENSG00000112290
chr6	119349560	119349571	EGR2	MA0472.2	MAN1A1	ENSG00000111885
chr6	119349858	119349869	EGR2	MA0472.2	MAN1A1	ENSG00000111885
chr7	2508863	2508874	EGR2	MA0472.2	LFNG	ENSG00000106003
chr7	18639258	18639269	EGR2	MA0472.2	HDAC9	ENSG00000048052
chr7	39733480	39733491	EGR2	MA0472.2	LINC00265	ENSG00000188185
chr7	44979051	44979062	EGR2	MA0472.2	MYO1G	ENSG00000136286
chr7	75739094	75739105	EGR2	MA0472.2	HIP1	ENSG00000127946
chr7	75739303	75739314	EGR2	MA0472.2	HIP1	ENSG00000127946
chr7	104945209	104945220	EGR2	MA0472.2		ENSG00000237513
chr7	131105962	131105973	EGR2	MA0472.2	LINC-PINT	ENSG00000231721
chr7	131106191	131106202	EGR2	MA0472.2	LINC-PINT	ENSG00000231721
chr7	138002221	138002232	EGR2	MA0472.2	CREB3L2	ENSG00000182158
chr8	81280548	81280559	EGR2	MA0472.2	FABP5	ENSG00000164687
chr8	90645753	90645764	EGR2	MA0472.2	TMEM64	ENSG00000180694
chr9	93134608	93134619	EGR2	MA0472.2	NINJ1	ENSG00000131669
chr9	96450133	96450144	EGR2	MA0472.2	HABP4	ENSG00000130956
chr9	127569130	127569141	EGR2	MA0472.2	NIBAN2	ENSG00000136830
chr9	129496106	129496117	EGR2	MA0472.2	LINC00963	ENSG00000204054
chr9	132241061	132241072	EGR2	MA0472.2	NTNG2	ENSG00000196358
chr9	136886661	136886672	EGR2	MA0472.2	TRAF2	ENSG00000127191
chr9	136886684	136886695	EGR2	MA0472.2	TRAF2	ENSG00000127191
chr9	137028325	137028336	EGR2	MA0472.2	ABCA2	ENSG00000107331
chrX	41923724	41923735	EGR2	MA0472.2	CASK	ENSG00000147044
chrX	46759227	46759238	EGR2	MA0472.2	SLC9A7	ENSG00000065923
chrX	49269416	49269427	EGR2	MA0472.2	PPP1R3F	ENSG00000049769
chrX	49269634	49269645	EGR2	MA0472.2	PPP1R3F	ENSG00000049769
chr1	1000201	1000216	EGR3	MA0732.1	HES4	ENSG00000188290
chr1	1201317	1201332	EGR3	MA0732.1	TNFRSF18	ENSG00000186891
chr1	1201516	1201531	EGR3	MA0732.1	TNFRSF18	ENSG00000186891
chr1	12178133	12178148	EGR3	MA0732.1	TNFRSF1B	ENSG00000028137
chr1	12204266	12204281	EGR3	MA0732.1	TNFRSF1B	ENSG00000028137
chr1	24745244	24745259	EGR3	MA0732.1	CLIC4	ENSG00000169504
chr1	37479791	37479806	EGR3	MA0732.1	ZC3H12A	ENSG00000163874
chr1	40316766	40316781	EGR3	MA0732.1	COL9A2	ENSG00000049089
chr1	92485909	92485924	EGR3	MA0732.1	GFI1	ENSG00000162676
chr1	92485926	92485941	EGR3	MA0732.1	GFI1	ENSG00000162676
chr1	94927144	94927159	EGR3	MA0732.1	CNN3	ENSG00000117519
chr1	116570430	116570445	EGR3	MA0732.1	CD58	ENSG00000116815
chr1	116571029	116571044	EGR3	MA0732.1	CD58	ENSG00000116815
chr1	117605562	117605577	EGR3	MA0732.1	TENT5C	ENSG00000183508
chr1	117606232	117606247	EGR3	MA0732.1	TENT5C	ENSG00000183508
chr1	156106461	156106476	EGR3	MA0732.1	LMNA	ENSG00000160789
chr1	156106612	156106627	EGR3	MA0732.1	LMNA	ENSG00000160789
chr1	181105711	181105726	EGR3	MA0732.1	IER5	ENSG00000162783
chr1	182604484	182604499	EGR3	MA0732.1	RGS16	ENSG00000143333
chr1	184974010	184974025	EGR3	MA0732.1	NIBAN1	ENSG00000135842
chr1	184974159	184974174	EGR3	MA0732.1	NIBAN1	ENSG00000135842
chr1	185316253	185316268	EGR3	MA0732.1	IVNS1ABP	ENSG00000116679
chr1	185316724	185316739	EGR3	MA0732.1	IVNS1ABP	ENSG00000116679
chr1	229558812	229558827	EGR3	MA0732.1	ABCB10	ENSG00000135776
chr1	235866928	235866943	EGR3	MA0732.1	LYST	ENSG00000143669
chr10	5976288	5976303	EGR3	MA0732.1	IL15RA	ENSG00000134470
chr10	70887924	70887939	EGR3	MA0732.1	PCBD1	ENSG00000166228
chr10	79445794	79445809	EGR3	MA0732.1	ZCCHC24	ENSG00000165424
chr10	96832175	96832190	EGR3	MA0732.1	LCOR	ENSG00000196233
chr10	96832223	96832238	EGR3	MA0732.1	LCOR	ENSG00000196233
chr10	96832310	96832325	EGR3	MA0732.1	LCOR	ENSG00000196233
chr10	96832810	96832825	EGR3	MA0732.1	LCOR	ENSG00000196233
chr10	97292664	97292679	EGR3	MA0732.1	ARHGAP19	ENSG00000213390
chr10	102395611	102395626	EGR3	MA0732.1	NFKB2	ENSG00000077150
chr10	133357765	133357780	EGR3	MA0732.1	FUOM	ENSG00000148803
chr11	44950939	44950954	EGR3	MA0732.1	TP53I11	ENSG00000175274
chr11	62542956	62542971	EGR3	MA0732.1	AHNAK	ENSG00000124942
chr11	62546815	62546830	EGR3	MA0732.1	AHNAK	ENSG00000124942
chr11	65416468	65416483	EGR3	MA0732.1	NEAT1	ENSG00000245532
chr11	65416594	65416609	EGR3	MA0732.1	NEAT1	ENSG00000245532
chr11	78417627	78417642	EGR3	MA0732.1	GAB2	ENSG00000033327
chr11	95231126	95231141	EGR3	MA0732.1	SESN3	ENSG00000149212
chr11	107840922	107840937	EGR3	MA0732.1	SLC35F2	ENSG00000110660
chr11	118876958	118876973	EGR3	MA0732.1	CXCR5	ENSG00000160683
chr11	119317164	119317179	EGR3	MA0732.1	MCAM	ENSG00000076706
chr11	130069630	130069645	EGR3	MA0732.1	APLP2	ENSG00000084234
chr11	130069662	130069677	EGR3	MA0732.1	APLP2	ENSG00000084234
chr12	40106141	40106156	EGR3	MA0732.1	SLC2A13	ENSG00000151229
chr12	53268449	53268464	EGR3	MA0732.1	ESPL1	ENSG00000135476
chr12	68933228	68933243	EGR3	MA0732.1	CPM	ENSG00000135678
chr12	104456869	104456884	EGR3	MA0732.1	CHST11	ENSG00000171310
chr12	104958331	104958346	EGR3	MA0732.1	SLC41A2	ENSG00000136052
chr12	104958739	104958754	EGR3	MA0732.1	SLC41A2	ENSG00000136052
chr12	113136034	113136049	EGR3	MA0732.1	RASAL1	ENSG00000111344
chr12	113136274	113136289	EGR3	MA0732.1	RASAL1	ENSG00000111344
chr13	42040681	42040696	EGR3	MA0732.1	DGKH	ENSG00000102780
chr14	24094255	24094270	EGR3	MA0732.1	PCK2	ENSG00000100889
chr14	35402510	35402525	EGR3	MA0732.1	NFKBIA	ENSG00000100906
chr15	67521608	67521623	EGR3	MA0732.1	IQCH-AS1	ENSG00000259673
chr16	11742519	11742534	EGR3	MA0732.1	TXNDC11	ENSG00000153066
chr16	27367579	27367594	EGR3	MA0732.1	IL4R	ENSG00000077238
chr16	27402118	27402133	EGR3	MA0732.1	IL21R	ENSG00000103522
chr16	68448864	68448879	EGR3	MA0732.1	SMPD3	ENSG00000103056
chr16	81779314	81779329	EGR3	MA0732.1	PLCG2	ENSG00000197943
chr16	88452623	88452638	EGR3	MA0732.1	ZFPM1	ENSG00000179588
chr16	88452745	88452760	EGR3	MA0732.1	ZFPM1	ENSG00000179588
chr16	88452946	88452961	EGR3	MA0732.1	ZFPM1	ENSG00000179588
chr16	88453132	88453147	EGR3	MA0732.1	ZFPM1	ENSG00000179588
chr16	88457102	88457117	EGR3	MA0732.1	ZFPM1	ENSG00000179588
chr17	1473926	1473941	EGR3	MA0732.1	MYO1C	ENSG00000197879
chr17	2814770	2814785	EGR3	MA0732.1		ENSG00000132359
chr17	14309558	14309573	EGR3	MA0732.1		ENSG00000266709
chr17	45317185	45317200	EGR3	MA0732.1	MAP3K14	ENSG00000006062
chr17	50200407	50200422	EGR3	MA0732.1	COL1A1	ENSG00000108821
chr17	77140761	77140776	EGR3	MA0732.1	SEC14L1	ENSG00000129657
chr17	77140853	77140868	EGR3	MA0732.1	SEC14L1	ENSG00000129657
chr19	2475336	2475351	EGR3	MA0732.1	GADD45B	ENSG00000099860
chr19	2475363	2475378	EGR3	MA0732.1	GADD45B	ENSG00000099860
chr19	2475964	2475979	EGR3	MA0732.1	GADD45B	ENSG00000099860
chr19	10096454	10096469	EGR3	MA0732.1	ANGPTL6	ENSG00000130812
chr19	10416801	10416816	EGR3	MA0732.1	PDE4A	ENSG00000065989
chr19	11346208	11346223	EGR3	MA0732.1	CCDC159	ENSG00000183401
chr19	11346701	11346716	EGR3	MA0732.1	CCDC159	ENSG00000183401
chr19	12333646	12333661	EGR3	MA0732.1	ZNF563	ENSG00000188868
chr19	45001304	45001319	EGR3	MA0732.1	RELB	ENSG00000104856
chr19	45001324	45001339	EGR3	MA0732.1	RELB	ENSG00000104856
chr19	45001418	45001433	EGR3	MA0732.1	RELB	ENSG00000104856
chr19	45001790	45001805	EGR3	MA0732.1	RELB	ENSG00000104856
chr19	45001902	45001917	EGR3	MA0732.1	RELB	ENSG00000104856
chr19	45002099	45002114	EGR3	MA0732.1	RELB	ENSG00000104856
chr19	46619901	46619916	EGR3	MA0732.1	PTGIR	ENSG00000160013
chr19	46634334	46634349	EGR3	MA0732.1	GNG8	ENSG00000167414
chr2	24917309	24917324	EGR3	MA0732.1	ADCY3	ENSG00000138031
chr2	46941035	46941050	EGR3	MA0732.1	TTC7A	ENSG00000068724
chr2	46941147	46941162	EGR3	MA0732.1	TTC7A	ENSG00000068724
chr2	46987140	46987155	EGR3	MA0732.1	TTC7A	ENSG00000068724
chr2	60881035	60881050	EGR3	MA0732.1	REL	ENSG00000162924
chr2	60881474	60881489	EGR3	MA0732.1	REL	ENSG00000162924
chr2	62195899	62195914	EGR3	MA0732.1	B3GNT2	ENSG00000170340
chr2	96145531	96145546	EGR3	MA0732.1	DUSP2	ENSG00000158050
chr2	100104871	100104886	EGR3	MA0732.1	AFF3	ENSG00000144218
chr2	135820158	135820173	EGR3	MA0732.1	LCT-AS1	ENSG00000226806
chr2	174487084	174487099	EGR3	MA0732.1	GPR155	ENSG00000163328
chr2	191677903	191677918	EGR3	MA0732.1	NABP1	ENSG00000173559
chr2	191677938	191677953	EGR3	MA0732.1	NABP1	ENSG00000173559
chr2	191678115	191678130	EGR3	MA0732.1	NABP1	ENSG00000173559
chr2	218880478	218880493	EGR3	MA0732.1	WNT10A	ENSG00000135925
chr2	218880574	218880589	EGR3	MA0732.1	WNT10A	ENSG00000135925
chr2	218897131	218897146	EGR3	MA0732.1	WNT10A	ENSG00000135925
chr20	844836	844851	EGR3	MA0732.1	FAM110A	ENSG00000125898
chr20	32207836	32207851	EGR3	MA0732.1	PLAGL2	ENSG00000126003
chr20	34704706	34704721	EGR3	MA0732.1	TP53INP2	ENSG00000078804
chr20	49713916	49713931	EGR3	MA0732.1	B4GALT5	ENSG00000158470
chr22	20495950	20495965	EGR3	MA0732.1	KLHL22	ENSG00000099910
chr22	25564811	25564826	EGR3	MA0732.1	GRK3	ENSG00000100077
chr22	28883204	28883219	EGR3	MA0732.1	ZNRF3	ENSG00000183579
chr22	28883309	28883324	EGR3	MA0732.1	ZNRF3	ENSG00000183579
chr22	37150208	37150223	EGR3	MA0732.1	IL2RB	ENSG00000100385
chr22	41946898	41946913	EGR3	MA0732.1	CENPM	ENSG00000100162
chr22	44702090	44702105	EGR3	MA0732.1	PRR5	ENSG00000186654
chr3	3799306	3799321	EGR3	MA0732.1	LRRN1	ENSG00000175928
chr3	14402817	14402832	EGR3	MA0732.1	SLC6A6	ENSG00000131389
chr3	56802149	56802164	EGR3	MA0732.1	ARHGEF3	ENSG00000163947
chr3	66501264	66501279	EGR3	MA0732.1	LRIG1	ENSG00000144749
chr3	66501454	66501469	EGR3	MA0732.1	LRIG1	ENSG00000144749
chr3	101827843	101827858	EGR3	MA0732.1	NFKBIZ	ENSG00000144802
chr3	101827916	101827931	EGR3	MA0732.1	NFKBIZ	ENSG00000144802
chr3	101849922	101849937	EGR3	MA0732.1	NFKBIZ	ENSG00000144802
chr3	105368759	105368774	EGR3	MA0732.1	ALCAM	ENSG00000170017
chr3	130893738	130893753	EGR3	MA0732.1	ATP2C1	ENSG00000017260
chr4	1011351	1011366	EGR3	MA0732.1	FGFRL1	ENSG00000127418
chr4	1011402	1011417	EGR3	MA0732.1	FGFRL1	ENSG00000127418
chr4	1011485	1011500	EGR3	MA0732.1	FGFRL1	ENSG00000127418
chr4	1055918	1055933	EGR3	MA0732.1	RNF212	ENSG00000178222
chr4	48270092	48270107	EGR3	MA0732.1	TEC	ENSG00000135605
chr4	80183747	80183762	EGR3	MA0732.1	PRDM8	ENSG00000152784
chr4	80183815	80183830	EGR3	MA0732.1	PRDM8	ENSG00000152784
chr4	80184288	80184303	EGR3	MA0732.1	PRDM8	ENSG00000152784
chr4	155758850	155758865	EGR3	MA0732.1	GUCY1B1	ENSG00000061918
chr4	173369827	173369842	EGR3	MA0732.1	SAP30-DT	ENSG00000272870
chr4	173370909	173370924	EGR3	MA0732.1	SAP30-DT	ENSG00000272870
chr4	173371317	173371332	EGR3	MA0732.1	SAP30-DT	ENSG00000272870
chr4	185143313	185143328	EGR3	MA0732.1	SLC25A4	ENSG00000151729
chr5	177497603	177497618	EGR3	MA0732.1	PDLIM7	ENSG00000196923
chr6	2903352	2903367	EGR3	MA0732.1	SERPINB9	ENSG00000170542
chr6	39229480	39229495	EGR3	MA0732.1	KCNK5	ENSG00000164626
chr6	43229461	43229476	EGR3	MA0732.1	DNPH1	ENSG00000112667
chr6	44257610	44257625	EGR3	MA0732.1	SLC35B2	ENSG00000157593
chr6	53548217	53548232	EGR3	MA0732.1	GCLC	ENSG00000001084
chr6	109009483	109009498	EGR3	MA0732.1	SESN1	ENSG00000080546
chr6	109009552	109009567	EGR3	MA0732.1	SESN1	ENSG00000080546
chr6	110179248	110179263	EGR3	MA0732.1	WASF1	ENSG00000112290
chr6	110179891	110179906	EGR3	MA0732.1	WASF1	ENSG00000112290
chr6	110180049	110180064	EGR3	MA0732.1	WASF1	ENSG00000112290
chr6	110180085	110180100	EGR3	MA0732.1	WASF1	ENSG00000112290
chr6	119349558	119349573	EGR3	MA0732.1	MAN1A1	ENSG00000111885
chr6	119349856	119349871	EGR3	MA0732.1	MAN1A1	ENSG00000111885
chr6	119350493	119350508	EGR3	MA0732.1	MAN1A1	ENSG00000111885
chr7	2508861	2508876	EGR3	MA0732.1	LFNG	ENSG00000106003
chr7	2519714	2519729	EGR3	MA0732.1	LFNG	ENSG00000106003
chr7	18639256	18639271	EGR3	MA0732.1	HDAC9	ENSG00000048052
chr7	39733478	39733493	EGR3	MA0732.1	LINC00265	ENSG00000188185
chr7	44979049	44979064	EGR3	MA0732.1	MYO1G	ENSG00000136286
chr7	48089070	48089085	EGR3	MA0732.1	UPP1	ENSG00000183696
chr7	48089103	48089118	EGR3	MA0732.1	UPP1	ENSG00000183696
chr7	75739092	75739107	EGR3	MA0732.1	HIP1	ENSG00000127946
chr7	75739301	75739316	EGR3	MA0732.1	HIP1	ENSG00000127946
chr7	104945207	104945222	EGR3	MA0732.1		ENSG00000237513
chr7	131105960	131105975	EGR3	MA0732.1	LINC-PINT	ENSG00000231721
chr7	131106189	131106204	EGR3	MA0732.1	LINC-PINT	ENSG00000231721
chr7	138002219	138002234	EGR3	MA0732.1	CREB3L2	ENSG00000182158
chr8	37899535	37899550	EGR3	MA0732.1	RAB11FIP1	ENSG00000156675
chr8	81280546	81280561	EGR3	MA0732.1	FABP5	ENSG00000164687
chr8	90645751	90645766	EGR3	MA0732.1	TMEM64	ENSG00000180694
chr9	89701483	89701498	EGR3	MA0732.1		ENSG00000237372
chr9	96450131	96450146	EGR3	MA0732.1	HABP4	ENSG00000130956
chr9	127569128	127569143	EGR3	MA0732.1	NIBAN2	ENSG00000136830
chr9	129488778	129488793	EGR3	MA0732.1	LINC00963	ENSG00000204054
chr9	136843977	136843992	EGR3	MA0732.1	AJM1	ENSG00000232434
chr9	136886659	136886674	EGR3	MA0732.1	TRAF2	ENSG00000127191
chr9	136886682	136886697	EGR3	MA0732.1	TRAF2	ENSG00000127191
chr9	137028323	137028338	EGR3	MA0732.1	ABCA2	ENSG00000107331
chrX	41923722	41923737	EGR3	MA0732.1	CASK	ENSG00000147044
chrX	46759225	46759240	EGR3	MA0732.1	SLC9A7	ENSG00000065923
chrX	46759421	46759436	EGR3	MA0732.1	SLC9A7	ENSG00000065923
chrX	49269414	49269429	EGR3	MA0732.1	PPP1R3F	ENSG00000049769
chrX	49269632	49269647	EGR3	MA0732.1	PPP1R3F	ENSG00000049769
chr1	12178155	12178169	ELF1	MA0473.3	TNFRSF1B	ENSG00000028137
chr1	15417649	15417663	ELF1	MA0473.3	EFHD2	ENSG00000142634
chr1	15417711	15417725	ELF1	MA0473.3	EFHD2	ENSG00000142634
chr1	37477441	37477455	ELF1	MA0473.3	ZC3H12A	ENSG00000163874
chr1	67686046	67686060	ELF1	MA0473.3	GADD45A	ENSG00000116717
chr1	92476567	92476581	ELF1	MA0473.3	GFI1	ENSG00000162676
chr1	92486149	92486163	ELF1	MA0473.3	GFI1	ENSG00000162676
chr1	156096998	156097012	ELF1	MA0473.3	LMNA	ENSG00000160789
chr1	156097176	156097190	ELF1	MA0473.3	LMNA	ENSG00000160789
chr1	156106277	156106291	ELF1	MA0473.3	LMNA	ENSG00000160789
chr1	156127180	156127194	ELF1	MA0473.3	LMNA	ENSG00000160789
chr1	167090824	167090838	ELF1	MA0473.3	GPA33	ENSG00000143167
chr1	181089766	181089780	ELF1	MA0473.3	IER5	ENSG00000162783
chr1	181105094	181105108	ELF1	MA0473.3	IER5	ENSG00000162783
chr1	205288319	205288333	ELF1	MA0473.3	TMCC2	ENSG00000133069
chr1	205288447	205288461	ELF1	MA0473.3	TMCC2	ENSG00000133069
chr1	223726928	223726942	ELF1	MA0473.3	CAPN2	ENSG00000162909
chr1	235868135	235868149	ELF1	MA0473.3	LYST	ENSG00000143669
chr1	235868260	235868274	ELF1	MA0473.3	LYST	ENSG00000143669
chr10	17646159	17646173	ELF1	MA0473.3	STAM	ENSG00000136738
chr10	96833062	96833076	ELF1	MA0473.3	LCOR	ENSG00000196233
chr10	110497721	110497735	ELF1	MA0473.3	DUSP5	ENSG00000138166
chr10	114304933	114304947	ELF1	MA0473.3	AFAP1L2	ENSG00000169129
chr10	126041818	126041832	ELF1	MA0473.3	ADAM12	ENSG00000148848
chr10	126041918	126041932	ELF1	MA0473.3	ADAM12	ENSG00000148848
chr11	62555452	62555466	ELF1	MA0473.3	AHNAK	ENSG00000124942
chr11	62555693	62555707	ELF1	MA0473.3	AHNAK	ENSG00000124942
chr11	62556716	62556730	ELF1	MA0473.3	AHNAK	ENSG00000124942
chr11	62556737	62556751	ELF1	MA0473.3	AHNAK	ENSG00000124942
chr11	65419143	65419157	ELF1	MA0473.3	NEAT1	ENSG00000245532
chr11	102317318	102317332	ELF1	MA0473.3	BIRC3	ENSG00000023445
chr11	102317932	102317946	ELF1	MA0473.3	BIRC3	ENSG00000023445
chr11	118876909	118876923	ELF1	MA0473.3	CXCR5	ENSG00000160683
chr11	118877000	118877014	ELF1	MA0473.3	CXCR5	ENSG00000160683
chr12	642830	642844	ELF1	MA0473.3	NINJ2-AS1	ENSG00000177406
chr12	8914691	8914705	ELF1	MA0473.3	PHC1	ENSG00000111752
chr12	8949654	8949668	ELF1	MA0473.3	M6PR	ENSG00000003056
chr12	104720798	104720812	ELF1	MA0473.3	SLC41A2	ENSG00000136052
chr13	40485855	40485869	ELF1	MA0473.3	LINC00598	ENSG00000215483
chr13	40486004	40486018	ELF1	MA0473.3	LINC00598	ENSG00000215483
chr14	55354858	55354872	ELF1	MA0473.3	FBXO34	ENSG00000178974
chr15	43133713	43133727	ELF1	MA0473.3	TMEM62	ENSG00000137842
chr15	88897517	88897531	ELF1	MA0473.3	HAPLN3	ENSG00000140511
chr15	88897543	88897557	ELF1	MA0473.3	HAPLN3	ENSG00000140511
chr16	11783686	11783700	ELF1	MA0473.3	ZC3H7A	ENSG00000122299
chr16	27318494	27318508	ELF1	MA0473.3	IL4R	ENSG00000077238
chr16	27368275	27368289	ELF1	MA0473.3	IL4R	ENSG00000077238
chr16	27401928	27401942	ELF1	MA0473.3	IL21R	ENSG00000103522
chr16	30472591	30472605	ELF1	MA0473.3	ITGAL	ENSG00000005844
chr16	30472616	30472630	ELF1	MA0473.3	ITGAL	ENSG00000005844
chr16	47461243	47461257	ELF1	MA0473.3	PHKB	ENSG00000102893
chr16	68418105	68418119	ELF1	MA0473.3	SMPD3	ENSG00000103056
chr16	88443153	88443167	ELF1	MA0473.3	ZFPM1	ENSG00000179588
chr16	88452964	88452978	ELF1	MA0473.3	ZFPM1	ENSG00000179588
chr17	1628454	1628468	ELF1	MA0473.3	SLC43A2	ENSG00000167703
chr17	14301068	14301082	ELF1	MA0473.3	HS3ST3B1	ENSG00000125430
chr17	43211972	43211986	ELF1	MA0473.3	TMEM106A	ENSG00000184988
chr17	45317532	45317546	ELF1	MA0473.3	MAP3K14	ENSG00000006062
chr17	63932374	63932388	ELF1	MA0473.3	CD79B	ENSG00000007312
chr17	68292240	68292254	ELF1	MA0473.3	ARSG	ENSG00000141337
chr17	74738384	74738398	ELF1	MA0473.3	RAB37	ENSG00000172794
chr18	45687464	45687478	ELF1	MA0473.3	SLC14A1	ENSG00000141469
chr18	75071185	75071199	ELF1	MA0473.3		ENSG00000278607
chr18	75071409	75071423	ELF1	MA0473.3		ENSG00000278607
chr18	75071446	75071460	ELF1	MA0473.3		ENSG00000278607
chr19	2476160	2476174	ELF1	MA0473.3	GADD45B	ENSG00000099860
chr19	2478856	2478870	ELF1	MA0473.3	GADD45B	ENSG00000099860
chr19	3178701	3178715	ELF1	MA0473.3	S1PR4	ENSG00000125910
chr19	10417064	10417078	ELF1	MA0473.3	PDE4A	ENSG00000065989
chr19	41875470	41875484	ELF1	MA0473.3	CD79A	ENSG00000105369
chr19	42199275	42199289	ELF1	MA0473.3	POU2F2	ENSG00000028277
chr19	45002125	45002139	ELF1	MA0473.3	RELB	ENSG00000104856
chr19	46618897	46618911	ELF1	MA0473.3	PTGIR	ENSG00000160013
chr19	46619910	46619924	ELF1	MA0473.3	PTGIR	ENSG00000160013
chr2	46941498	46941512	ELF1	MA0473.3	TTC7A	ENSG00000068724
chr2	62200338	62200352	ELF1	MA0473.3	B3GNT2	ENSG00000170340
chr2	96145364	96145378	ELF1	MA0473.3	DUSP2	ENSG00000158050
chr2	101252775	101252789	ELF1	MA0473.3	TBC1D8	ENSG00000204634
chr2	138501700	138501714	ELF1	MA0473.3	SPOPL	ENSG00000144228
chr2	174487384	174487398	ELF1	MA0473.3	GPR155	ENSG00000163328
chr2	191617801	191617815	ELF1	MA0473.3	NABP1	ENSG00000173559
chr2	218880545	218880559	ELF1	MA0473.3	WNT10A	ENSG00000135925
chr2	240568481	240568495	ELF1	MA0473.3	RNPEPL1	ENSG00000142327
chr20	833662	833676	ELF1	MA0473.3	FAM110A	ENSG00000125898
chr20	31723349	31723363	ELF1	MA0473.3	BCL2L1	ENSG00000171552
chr20	31723943	31723957	ELF1	MA0473.3	BCL2L1	ENSG00000171552
chr20	57628176	57628190	ELF1	MA0473.3	ZBP1	ENSG00000124256
chr21	15441321	15441335	ELF1	MA0473.3		ENSG00000229425
chr21	42393342	42393356	ELF1	MA0473.3	TMPRSS3	ENSG00000160183
chr22	37122333	37122347	ELF1	MA0473.3	TMPRSS6	ENSG00000187045
chr22	37149954	37149968	ELF1	MA0473.3	IL2RB	ENSG00000100385
chr22	41781340	41781354	ELF1	MA0473.3	MEI1	ENSG00000167077
chr22	42071131	42071145	ELF1	MA0473.3	NAGA	ENSG00000198951
chr3	4519192	4519206	ELF1	MA0473.3	ITPR1	ENSG00000150995
chr3	14432422	14432436	ELF1	MA0473.3	SLC6A6	ENSG00000131389
chr3	32371512	32371526	ELF1	MA0473.3	CMTM7	ENSG00000153551
chr3	32458102	32458116	ELF1	MA0473.3	CMTM7	ENSG00000153551
chr3	56758730	56758744	ELF1	MA0473.3	ARHGEF3	ENSG00000163947
chr3	66394341	66394355	ELF1	MA0473.3	LRIG1	ENSG00000144749
chr3	66472747	66472761	ELF1	MA0473.3	LRIG1	ENSG00000144749
chr3	72100729	72100743	ELF1	MA0473.3	LINC00877	ENSG00000241163
chr3	72101049	72101063	ELF1	MA0473.3	LINC00877	ENSG00000241163
chr3	105369580	105369594	ELF1	MA0473.3	ALCAM	ENSG00000170017
chr3	130893918	130893932	ELF1	MA0473.3	ATP2C1	ENSG00000017260
chr3	142724176	142724190	ELF1	MA0473.3	TRPC1	ENSG00000144935
chr3	183285952	183285966	ELF1	MA0473.3	B3GNT5	ENSG00000176597
chr3	183286147	183286161	ELF1	MA0473.3	B3GNT5	ENSG00000176597
chr3	196082159	196082173	ELF1	MA0473.3	TFRC	ENSG00000072274
chr4	1056058	1056072	ELF1	MA0473.3	RNF212	ENSG00000178222
chr4	80173569	80173583	ELF1	MA0473.3	PRDM8	ENSG00000152784
chr4	80182218	80182232	ELF1	MA0473.3	PRDM8	ENSG00000152784
chr4	89294629	89294643	ELF1	MA0473.3	GPRIN3	ENSG00000185477
chr4	89307776	89307790	ELF1	MA0473.3	GPRIN3	ENSG00000185477
chr4	121139757	121139771	ELF1	MA0473.3	TNIP3	ENSG00000050730
chr4	121256566	121256580	ELF1	MA0473.3	TNIP3	ENSG00000050730
chr4	139555398	139555412	ELF1	MA0473.3	SETD7	ENSG00000145391
chr4	173369966	173369980	ELF1	MA0473.3	SAP30-DT	ENSG00000272870
chr5	10564176	10564190	ELF1	MA0473.3	ANKRD33B	ENSG00000164236
chr5	126852436	126852450	ELF1	MA0473.3	MARCHF3	ENSG00000173926
chr5	139390148	139390162	ELF1	MA0473.3	MZB1	ENSG00000170476
chr5	150412901	150412915	ELF1	MA0473.3	CD74	ENSG00000019582
chr5	151759027	151759041	ELF1	MA0473.3	ATOX1	ENSG00000177556
chr5	157731392	157731406	ELF1	MA0473.3	THG1L	ENSG00000113272
chr5	160468091	160468105	ELF1	MA0473.3	MIR3142HG	ENSG00000253522
chr5	177497324	177497338	ELF1	MA0473.3	PDLIM7	ENSG00000196923
chr6	20403610	20403624	ELF1	MA0473.3	E2F3	ENSG00000112242
chr6	31572246	31572260	ELF1	MA0473.3	LTA	ENSG00000226979
chr6	32685780	32685794	ELF1	MA0473.3	HLA-DQB1	ENSG00000179344
chr6	41560973	41560987	ELF1	MA0473.3	FOXP4	ENSG00000137166
chr6	44265796	44265810	ELF1	MA0473.3	NFKBIE	ENSG00000146232
chr6	110180128	110180142	ELF1	MA0473.3	WASF1	ENSG00000112290
chr6	119349488	119349502	ELF1	MA0473.3	MAN1A1	ENSG00000111885
chr6	129490665	129490679	ELF1	MA0473.3	LAMA2	ENSG00000196569
chr6	131628424	131628438	ELF1	MA0473.3	ENPP3	ENSG00000154269
chr6	136792599	136792613	ELF1	MA0473.3	MAP3K5	ENSG00000197442
chr6	144150255	144150269	ELF1	MA0473.3	STX11	ENSG00000135604
chr6	144151083	144151097	ELF1	MA0473.3	STX11	ENSG00000135604
chr6	144151335	144151349	ELF1	MA0473.3	STX11	ENSG00000135604
chr6	149484981	149484995	ELF1	MA0473.3	ZC3H12D	ENSG00000178199
chr7	8126050	8126064	ELF1	MA0473.3		ENSG00000227719
chr7	39733559	39733573	ELF1	MA0473.3	LINC00265	ENSG00000188185
chr7	44979094	44979108	ELF1	MA0473.3	MYO1G	ENSG00000136286
chr7	55533589	55533603	ELF1	MA0473.3	VOPP1	ENSG00000154978
chr7	104945120	104945134	ELF1	MA0473.3		ENSG00000237513
chr7	128939195	128939209	ELF1	MA0473.3	IRF5	ENSG00000128604
chr7	138002336	138002350	ELF1	MA0473.3	CREB3L2	ENSG00000182158
chr8	12754321	12754335	ELF1	MA0473.3	LONRF1	ENSG00000154359
chr8	80893815	80893829	ELF1	MA0473.3	ZNF704	ENSG00000164684
chr8	124564789	124564803	ELF1	MA0473.3	MTSS1	ENSG00000170873
chr8	124660564	124660578	ELF1	MA0473.3	MTSS1	ENSG00000170873
chr8	124688055	124688069	ELF1	MA0473.3	MTSS1	ENSG00000170873
chr9	89701419	89701433	ELF1	MA0473.3		ENSG00000237372
chr9	114505562	114505576	ELF1	MA0473.3	WHRN	ENSG00000095397
chr9	120931685	120931699	ELF1	MA0473.3	TRAF1	ENSG00000056558
chr9	121744543	121744557	ELF1	MA0473.3	DAB2IP	ENSG00000136848
chr9	129496272	129496286	ELF1	MA0473.3	LINC00963	ENSG00000204054
chrX	130092265	130092279	ELF1	MA0473.3	ELF4	ENSG00000102034
chr1	39955663	39955675	ELF2	MA1483.1	MFSD2A	ENSG00000168389
chr1	156106279	156106291	ELF2	MA1483.1	LMNA	ENSG00000160789
chr1	167090824	167090836	ELF2	MA1483.1	GPA33	ENSG00000143167
chr1	185317597	185317609	ELF2	MA1483.1	IVNS1ABP	ENSG00000116679
chr10	17646161	17646173	ELF2	MA1483.1	STAM	ENSG00000136738
chr10	96832016	96832028	ELF2	MA1483.1	LCOR	ENSG00000196233
chr10	126041918	126041930	ELF2	MA1483.1	ADAM12	ENSG00000148848
[truncated: 26,138 more rows]
